# Supplementary material for: Rates and predictors of ACE inhibitor discontinuation subsequent to elevated serum creatinine: a retrospective cohort study
Source: PubMed Central journal article supplement — BMJ Open. 2014 Aug 13;4(8):e005181. doi: 10.1136/bmjopen-2014-005181 (PMC4139635; doi:10.1136/bmjopen-2014-005181), 2014-08-13
Supplement: bmjopen-2014-005181.draft_revisions.pdf [file bmjopen-2014-005181.draft_revisions.pdf]

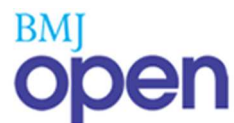

**Rates and Predictors of Angiotensin-Converting Enzyme Inhibitor Discontinuation Subsequent to Elevated Serum Creatinine**

|                                 |                                                                                                                                 |
|---------------------------------|---------------------------------------------------------------------------------------------------------------------------------|
| Journal:                        | <i>BMJ Open</i>                                                                                                                 |
| Manuscript ID:                  | bmjopen-2014-005181                                                                                                             |
| Article Type:                   | Research                                                                                                                        |
| Date Submitted by the Author:   | 04-Mar-2014                                                                                                                     |
| Complete List of Authors:       | Jackevicius, Cynthia; Western University of Health Sciences,<br>Wong, Joyce<br>Aroustamian, Irina<br>Gee, Manyee<br>Mody, Freny |
| <b>Primary Subject Heading</b>: | General practice / Family practice                                                                                              |
| Secondary Subject Heading:      | Pharmacology and therapeutics                                                                                                   |
| Keywords:                       | INTERNAL MEDICINE, Adverse events < THERAPEUTICS, Chronic renal failure < NEPHROLOGY                                            |
|                                 |                                                                                                                                 |

SCHOLARONE™  
Manuscripts

# Rates and Predictors of Angiotensin-Converting Enzyme Inhibitor Discontinuation

## Subsequent to Elevated Serum Creatinine: A Cohort Study

Cynthia A. Jackevicius, BScPhm, MSc, PharmD<sup>1, 2, 3, 4</sup>, Joyce Wong, PharmD<sup>1</sup>, Irina Aroustamian, PharmD<sup>1</sup>, Manyee Gee, PhD<sup>2</sup>, Freny Vaghaiwalla Mody, MD FACC<sup>2, 6</sup>

Department of Pharmacy Practice and Administration, Western University of Health Sciences<sup>1</sup>, Department of Medicine & Pharmacy, Veteran Affairs Greater Los Angeles Healthcare System<sup>2</sup>, Institute of Health Policy, Management and Evaluation, Faculty of Medicine, University of Toronto<sup>3</sup>, Institute for Clinical Evaluative Sciences<sup>4</sup>, University Health Network<sup>5</sup>, David Geffen School of Medicine, University of California Los Angeles<sup>6</sup>

Corresponding author:

Freny Vaghaiwalla Mody, MD

VA Greater Los Angeles Healthcare System & David Geffen School of Medicine at UCLA

Phone: 310-268-3839 Fax: 310-268-4391 Email: freny.mody@va.gov

Running Title: Predictors of ACEI Discontinuation

Word count: 2602

**Key Words:** ACE inhibitors, serum creatinine, renal dysfunction, drug utilization, chronic kidney disease

## Abstract

Background: Angiotensin-converting enzyme inhibitors (ACEI) are underutilized despite cardiovascular benefits, in part due to concerns of elevations in serum creatinine (SCr). We evaluated rates and predictors of ACEI discontinuation after SCr elevation post-ACEI initiation since limited data are available that examine this issue.

Methods: In this retrospective, cohort study, we estimated the rates and factors associated with ACEI discontinuation subsequent to SCr elevation after ACEI initiation, and for patients with baseline SCr > 2mg/dL, the change in SCr associated with chronic use. All patients initiating ACEI from January 1/02 to December 31/04 with 3 months SCr were included, and divided into 3 groups (SCr < 1.5, 1.5-2.0 and > 2.0). Predictors were identified using multivariate logistic regression modeling.

Results: At 3 months follow-up, the mean increase in SCr post-ACEI initiation was 26%, ranging from -0.01 mg/dL to 0.42 mg/dL varying according to level of baseline renal function. ACEI discontinuation was highest in patients with elevated baseline SCr (11.5%) compared with those with SCr > 1.5 (5.4%) and those with SCr 1.5-2.0 (7.4%). Patients that were male, or with heart failure were less likely to discontinue ACEI after an elevation of serum creatinine post-ACEI initiation, while those taking NSAIDs, diuretics and beta-blockers were more likely to discontinue ACEI.

Conclusion: Serum creatinine increases < 30% on average within 3 months of ACEI initiation, with subsequent discontinuation rates varying by baseline SCr. Elevation in SCr was not associated with ACEI discontinuation rates. Despite an acute increase in SCr, chronic ACEI use was associated with a decrease in SCr in most patients with SCr > 2mg/dL.

## Article Summary

### Strengths and Limitations of this Study

- To date, no studies have evaluated both the acute elevation in serum creatinine post-ACE inhibitor initiation and the predictors of subsequent discontinuation following an elevated serum creatinine.
- This study confirmed the mean increase in serum creatinine after ACE inhibitor initiation is 26%, varying with baseline renal function.
- Factors other than elevation in serum creatinine were associated with ACE inhibitor discontinuation, including, female sex, absence of heart failure, and use of NSAIDs, diuretics or beta-blockers.

## Introduction

Current guidelines recommend angiotensin-converting enzyme inhibitors (ACEIs) as the standard of therapy for post-myocardial infarction, chronic heart failure (CHF), and diabetes due to the substantial endothelial, cardiovascular and renal protection.<sup>1-4</sup> Furthermore, ACEIs have also been shown to be a beneficial therapy for hypertension.<sup>5</sup> The renal protective mechanism of ACEIs vary, ranging from improving vascular endothelium function to vasodilatation effects.<sup>6</sup> Despite evidence from numerous trials showing the benefits of improved morbidity and mortality by ACEIs, these drugs are still underutilized.<sup>1-4, 7-10</sup> Clinicians are reluctant to start and continue with adequate dosing of ACEIs primarily due to concerns of elevations in serum creatinine (SCr), particularly in patients with CKD despite evidence that this group of patients benefits from ACEI.<sup>10,11</sup> The most probable cause of an acute elevation in SCr post-ACEI initiation is the decrease in vasoconstriction in the efferent arterioles resulting in pressure reduction in the glomerular apparatus and decreased glomerular filtration rate (GFR).<sup>6</sup> However, homeostasis of hemodynamics occurs with long-term use with gradual return and improvement in GFR.<sup>7</sup> Even with concerns of an acute rise in SCr, ACEIs provide long-term benefits with some data suggesting an improvement in renal function with decrease in SCr with long-term use.<sup>7,11,12</sup> In heart failure (HF) patients, RCTs estimate that between 2.4% and 16% of patients experience an acute increase in SCr of > 0.5mg/dL after ACEI initiation, with improvement with chronic use.<sup>8-9</sup> In a practice-based setting, Bakris and colleagues demonstrated a mean increase in SCr of 30% in a hypertensive population using ACEIs with the increase stabilizing within 2 months after ACEI initiation. This rise in SCr is reversible upon discontinuation and is less likely to occur beyond 4 weeks of initiation.<sup>13,14</sup> HF patients suffer a more pronounced increase in SCr with ACEIs due to a reduction of blood flow to the kidneys from reduced cardiac output, diuretic

1  
2  
3 use, and vasodilation effect. Although the acute increase in SCr seen in HF patients ranges from  
4  
5 75% to 200% from baseline after ACEI initiation, this elevation was suggested as being  
6  
7 acceptable since ACEIs have proven benefits in decreasing mortality in this population.<sup>8,15</sup>  
8  
9

10 The frequency of the discontinuation rate of ACEI and the determinant factors associated  
11  
12 with discontinuation in the real world setting has not been fully characterized. The  
13  
14 CONSENSUS II HF trial reported a discontinuation rate of 4.6% with enalapril subsequent to the  
15  
16 rise of SCr, while a meta-analysis of randomized controlled trials of HF patients found an ACEI  
17  
18 discontinuation rate of 13.8%, of which only 0.4% was attributed to an increase in SCr.<sup>7,16</sup>  
19  
20  
21

22 To date, no studies have evaluated both the acute elevation in SCr post-ACEI initiation  
23  
24 and the predictors of subsequent discontinuation following an elevated SCr. Assessment of these  
25  
26 patterns may provide insight into clinician decision making in a real world setting. The objective  
27  
28 of our study was to assess the rates and predictors of ACEI discontinuation following an increase  
29  
30 in SCr post-ACEI initiation, each according to baseline renal function.  
31  
32  
33  
34  
35  
36  
37  
38  
39  
40  
41  
42  
43  
44  
45  
46  
47  
48  
49  
50  
51  
52  
53  
54  
55  
56  
57  
58  
59  
60

## Methods

We conducted a retrospective observational cohort study of all outpatients initiating an ACEI between 2002 and 2004 at the Veterans Affairs Greater Los Angeles Healthcare system (VAGLAHS). The Veterans Health Information System and Technology Architecture (VISTA) database was used to gather patient information (demographics, medication use, allergies, comorbidities, and lab results).

Initiation of ACEI was defined as the dispensing of an outpatient prescription for an ACEI with no previous record of ACEI use in the past 6 months. The following ACEI information was collected: initiation date, discontinuation date, adverse drug reactions (ADR), dosage, dosing frequency and the total daily dose. To determine the prevalence of a change in SCr, SCr was recorded at baseline (within 6 months of ACEI initiation) and 3-months (10-14 weeks) post-initiation. A 0.5mg/dL increase and 30% increase in SCr was considered to be clinically important since several studies have used this as a reference point to define a decrease in renal function.<sup>5-6,14</sup> Discontinuation of ACEI was defined as no refills within 90 days after the last filled prescription which allowed a lenient grace period for patients obtaining late refills. Patients were stratified into three baseline SCr groups (group 1: SCr <1.5mg/dL; group 2: 1.6-2.0mg/dL; and group 3: >2.0mg/dL) for analysis. We assessed above and below 0.5mg/dL and 30% to determine the threshold at which discontinuation occurred and to analyze possible differences in threshold by group. For those patients with a baseline SCr >2mg/dL and continued on an ACEI, SCr was recorded at 1-year to detect any changes post-initiation. Comorbidities (defined by ICD-9 codes: 425-cardiomyopathy, 428-congestive heart failure, 250-diabetes, 410-414-coronary artery disease, 274-gout, 401-hypertension) and concurrent use of NSAIDs, diuretics, and beta-blockers were documented to determine potential factors associated with an

1  
2  
3 increase in SCr and the discontinuation of ACEIs. Concomitant medication use was defined as  
4 having an active prescription within 1 month of the index date of ACEI prescription through the  
5  
6  
7  
8 time of discontinuation.  
9

10 The endpoints of this study were: the proportion of patients with a significant increase in  
11  
12 SCr post-ACEI initiation at 3-months follow-up defined as  $>0.5\text{mg/dL}$  or  $>30\%$  of baseline by  
13  
14 group; the proportion of patients with ACEI discontinued following a rise in SCr by group; the  
15  
16 threshold of increase in SCr associated with ACEI discontinuation, stratified by baseline SCr  
17  
18 groups; factors (patient characteristics, comorbidities, and concurrent medications) that may be  
19  
20 associated with discontinuation of ACEIs; and the change in SCr in patients with baseline SCr  
21  
22  $>2\text{mg/dL}$  and continued on ACEIs for 1 year.  
23  
24  
25  
26

27 Continuous baseline characteristics were expressed as the mean  $\pm$ SD or median; and  
28  
29 categorical baseline characteristics were expressed as a proportion . Chi square test was used to  
30  
31 compare the discontinuation rate after detecting a rise in SCr post-ACEI use between groups and  
32  
33 to compare the threshold of increase in SCr prior to discontinuation between groups. A multiple  
34  
35 logistic regression model was constructed to identify the factors associated with SCr elevation  
36  
37 subsequent to ACEI initiation and ACEI discontinuation. The univariate model included patient  
38  
39 characteristics (i.e., age, gender), comorbidities (i.e., diabetes, hypertension, coronary artery  
40  
41 disease, chronic heart failure, systolic blood pressure (SBP) $<100\text{mmHg}$ , gout), concomitant  
42  
43 NSAID use, diuretic use (i.e. thiazide, loop,  $\text{K}^+$  sparing), beta-blocker use, and significant SCr  
44  
45 elevation defined as  $>0.5\text{mg/dL}$  or  $>30\%$  of baseline. Variables with  $p < 0.2$  from the univariate  
46  
47 model were placed in a multiple logistic regression model using stepwise selection. Odds ratio  
48  
49 with 95% confidence interval were estimated from the regression model. A p-value  $< 0.05$  was  
50  
51 considered statistically significant. All results were analyzed using SAS [Version 8.2, SAS  
52  
53  
54  
55  
56  
57  
58  
59  
60



1  
2  
3 Institute, Cary, NC]. This was a non-funded study approved by the institutional review board at  
4  
5  
6 VAGLAHS and Western University of Health Sciences.  
7  
8  
9  
10  
11  
12  
13  
14  
15  
16  
17  
18  
19  
20  
21  
22  
23  
24  
25  
26  
27  
28  
29  
30  
31  
32  
33  
34  
35  
36  
37  
38  
39  
40  
41  
42  
43  
44  
45  
46  
47  
48  
49  
50  
51  
52  
53  
54  
55  
56  
57  
58  
59  
60

For peer review only

## Results

A total of 3,039 patients were initiated on an ACEI between January 2002 and December 2004 and had a SCr measured within 6 months prior to and 3 months after initiating an ACEI. (Figure 1) The average age was 65.0 years and 97.6% were male with a baseline SCr of 1.28 $\pm$ 0.86 mg/dL. Patients were stratified into three groups based on baseline SCr: Group 1 consisted of 2,497 patients with a SCr of <1.5 mg/dL (mean of 1.05 $\pm$  0.19); group 2 had 377 patients with a SCr of 1.5-2.0 mg/dL (mean of 1.67  $\pm$ 0.16); and group 3 had 165 patients with a SCr of >2.0 mg/dL (mean of 3.75 $\pm$ 2.44). (Figure 1) Hypertension (44.2%) and diabetes (28.5%) were the most frequently documented comorbidities, and the most common concomitant medications were diuretics and beta-blockers. (Table 1)

On average, patients had a follow-up SCr available at a median of 3.8 months post-ACEI initiation. The mean changes in SCr at 3 months follow-up were 0.05  $\pm$ 0.30 mg/dL, -0.01 $\pm$ 0.31 mg/dL, and 0.42  $\pm$ 2.20 mg/dL respectively, by group. There was no change in median SCr at 3 months follow-up for all three groups. Counting only those patients with an increase in SCr for all 3 groups, the average percent increase in SCr prior to ACEI discontinuation was 25.98%  $\pm$ 41.72 with a median of 13.49%.

At 3 months, the discontinuation rate of ACEI with or without concomitant SCr rise of >0.5mg/dL was highest in group 3 (11.5%), followed by group 2 (7.4%) and group 1 (5.4%) ( $p$ <0.001) (Figure 1). In the multiple logistic regression model the variables significantly associated with a greater likelihood of ACEI discontinuation were the use of NSAIDs, diuretics, and beta-blockers. (Table 2) Of note, a significant increase in SCr (defined as >0.5mg/dl or >30 %) was not associated with ACEI discontinuation. ( $p$ =0.498 in the univariate model). A history of CHF, SBP of <100mmHg at baseline and male sex were significantly associated with a reduced

1  
2  
3 likelihood of ACEI discontinuation.  
4

5 Changes in SCr were further evaluated based on absolute and percent change. Table 3  
6 depicts the change in SCr subsequent to ACEI discontinuation, at the threshold of 0.5mg/dL and  
7 30% increase in SCr. Group 3 had the highest mean increase in SCr as both absolute and percent  
8 change. A majority of the patients who experienced an increase in SCr had a change less than  
9 both 30% increase and 0.5mg/dL increase prior to discontinuation. Thus, most ACEI  
10 discontinuation did not occur following a clinically significant increase in SCr (>30% or  
11 >0.5mg/dL above baseline).  
12  
13  
14  
15  
16  
17  
18  
19  
20  
21

22 Of the 165 patients with a baseline SCr >2.0mg/dL (mean 3.75+/-2.44), only 50 patients  
23 (30.3%) were continued on an ACEI at 1 year. Of the 405 patients who discontinued ACEI, 165  
24 patients discontinued within 90 days of a SCr result. A total of 69 of the 165 (41.8%) patients  
25 experienced a decrease in SCr prior to discontinuation (average decrease was 1.04 +/- 1.77) and  
26 76 (46.0%) of the patients experienced an increase (average increase was 1.86+/-0.87) and 20  
27 (12.1%) patients experienced no change from baseline prior to discontinuation. Of the 50  
28 patients who continued on ACEIs, only 35 patients had a follow-up in SCr at 1 year and their  
29 mean decrease in SCr was -0.24 +/-0.56 with a median decrease of -0.01mg/dL. Of these 35  
30 patients, one (2.86%) had a larger increase in SCr (from 2.5 to 9.1 mg/dL) as compared with the  
31 remaining patients in the group (Figure 2). Excluding this subject as an outlier with a rise in SCr  
32 at 1 year that is unlikely due to ACEI, resulted in a mean decrease in SCr at 1 year in group 3 of -  
33 0.44+/-1.96 with a median of -0.01mg/dL. While the majority (54.28%) of patients in Group 3  
34 experienced a clinically significant absolute (>0.5 mg/dL) increase in SCr of 0.98+/-1.58  
35 compared with a baseline of 3.75+/-2.44, the 27% relative increase was not above the generally  
36 accepted threshold of >30%. Forty percent of this group experienced a decrease in SCr of  
37  
38  
39  
40  
41  
42  
43  
44  
45  
46  
47  
48  
49  
50  
51  
52  
53  
54  
55  
56  
57  
58  
59  
60

1  
2  
3 1.19+/-2.26 compared to baseline 3.75+/-2.44 and 5.7% had no change in SCr at 1-year follow-  
4  
5 up. The average magnitude of decrease in SCr was greater than the average magnitude of  
6  
7 increase in SCr with long term use of ACEI (1.19+/-2.26 mg/dL decrease versus 0.98 +/-  
8  
9 1.58mg/dL increase, p<0.001) in patients with SCr>2 mg/dL.  
10  
11  
12  
13  
14  
15  
16  
17  
18  
19  
20  
21  
22  
23  
24  
25  
26  
27  
28  
29  
30  
31  
32  
33  
34  
35  
36  
37  
38  
39  
40  
41  
42  
43  
44  
45  
46  
47  
48  
49  
50  
51  
52  
53  
54  
55  
56  
57  
58  
59  
60

For peer review only

## Discussion

In our study, which had a large hypertensive population, we showed an increase in SCr of approximately 26% post-ACEI initiation. Previous studies have documented similar acute increases in SCr of 30% in hypertensive patients and up to 200% in HF patients.<sup>13,14</sup> It has been suggested that ACEI discontinuation be considered if an increase in SCr exceeds 30% with ACEI use since renal function may be compromised beyond this increase and the benefits of ACEI may not outweigh the risks.<sup>13</sup> Our study showed that the majority of ACEI discontinuation occurred with an increase of less than 30% in SCr, thus suggesting that the threshold of concern for renal deterioration is lower in clinical practice or other factors may be more likely associated with discontinuation.

According to previous trials, a change in SCr of >0.5mg/dL may also be considered clinically significant.<sup>8,9</sup> The majority of the patients that discontinued ACEI in our study experienced a <0.5mg/dL change in SCr. Our study further suggested that on average, SCr was not greatly affected by ACEI since all three groups had no change in median SCr over 3 months. Thus, the discontinuation of ACEI in our population was most likely attributed to drug intolerances, such as, cough, other comorbidities, and concomitant medications, rather than the change in SCr. Only 6% of patients in the lower baseline SCr group suffered from documented cough or nausea leading to the discontinuation of ACEI. The adjusted regression analysis demonstrated that concomitant use of NSAIDs, diuretics, and beta-blockers were factors associated with a higher likelihood of ACEI discontinuation. This may be anticipated since both NSAIDs and diuretics have been documented to decrease renal function and exacerbate SCr elevations when used concomitantly with ACEI.<sup>12</sup> However, this may have led to the discontinuation of ACEI at a lower threshold of SCr increase. If discontinuation of ACEI was

1  
2  
3 indeed at a lower threshold than that traditionally accepted (SCr rise >0.5 or 30%), improved  
4 awareness for clinicians of the short duration of an acute rise in SCr when initiating ACEI, and  
5  
6 dose reduction or reassessment of need for concomitant NSAIDs or diuretics may be beneficial  
7  
8 strategies. This may confer better clinical outcomes for patients, particularly diabetic patients  
9  
10 who would benefit from the nephroprotective actions of ACEI. Contrary to previous findings,  
11  
12 beta-blockers were associated with a higher likelihood of discontinuation with concomitant use  
13  
14 of ACEI in our study rather than exerting a renoprotective effect with ACEI use.<sup>14</sup> Male sex,  
15  
16 CHF history, and SBP of <100mmHg were also associated with a lower chance of ACEI  
17  
18 discontinuation. We postulated that patients with CHF and SBP <100mmHg were more likely to  
19  
20 be maintained on an ACEI since HF studies have documented benefits of ACEI in decreasing  
21  
22 morbidity and mortality.<sup>1,7-8</sup>  
23  
24  
25  
26  
27  
28

29 In patients with baseline SCr >2 mg/dL, our study showed that SCr can increase,  
30  
31 decrease, or remain unchanged with long term ACEI use. Even though the majority of these  
32  
33 patients experienced an acute increase in SCr, our results support ACEI use in renal impaired  
34  
35 patients since the median change in SCr decreased and in the long term, the magnitude of  
36  
37 decrease was much more impressive than the magnitude of increase. Our study is consistent  
38  
39 with the prospective findings by Hou et al, that found despite the acute increase in SCr, long  
40  
41 term improvement in SCr occurs in many patients with impaired renal function at baseline.<sup>11</sup>  
42  
43 The use of ACEI is warranted in this group of patients, along with close monitoring of renal  
44  
45 function and electrolytes since benefits were documented in this study as well as in previous  
46  
47 studies.<sup>11-12</sup>  
48  
49  
50  
51  
52

53 Limitations of our study include its retrospective study design with potential for  
54  
55 confounding.<sup>20</sup> In addition, the electronic medical records may not be complete and accurate as  
56  
57  
58  
59  
60

1  
2  
3 is a limitation of any study relying on retrospective documentation. Finally, the sample size of  
4  
5 patients with SCr >2 mg/dL was small both pre- and post-follow-up of SCr. However, the large  
6  
7 population-based sample increases the generalizability of the findings.  
8  
9

10 Many clinicians may be reluctant to prescribe ACEIs to all eligible patients due to  
11  
12 concerns of an elevation in SCr. Based on this real world study, the magnitude of increase in  
13  
14 SCr post-ACEI initiation was lower than the commonly used threshold of 30%. Comorbidities  
15  
16 and concomitant medications that may increase SCr or a low threshold of concern for SCr  
17  
18 elevations may be more likely associated with ACEI discontinuation rather than a clinically  
19  
20 meaningful rise in SCr. The importance of monitoring should be emphasized to detect any  
21  
22 drastic increase in SCr >30% and to manage potential adverse drug reactions. Identification of  
23  
24 other factors that may increase SCr, such as, NSAID use, diuretic use, and volume depletion  
25  
26 should be considered before an ACEI is discontinued. Education may be required to change  
27  
28 practice patterns in patients with impaired baseline renal function in order to confer the clinical  
29  
30 benefit of chronic ACEI nephroprotection.  
31  
32  
33  
34  
35  
36  
37  
38  
39  
40  
41  
42  
43  
44  
45  
46  
47  
48  
49  
50  
51  
52  
53  
54  
55  
56  
57  
58  
59  
60

**Author Contributions:**

Jackevicius: Concept/design, data interpretation, critical revision of article, approval of article, statistics

Wong: Design, data analysis/interpretation, drafting article, approval of article, statistics

Aroustamian: Data analysis, critical revision of article, approval of article, statistics

Gee: Data collection/interpretation, critical revision of article, approval of article

Mody: Concept/design, data interpretation, critical revision of article, approval of article

**Funding:** None.

**Data Sharing:** No additional data available.

**Acknowledgments:** None.



**Table 1. Baseline characteristics of cohort (n= 3,039)**

| Characteristic                                       | Value*                                      |
|------------------------------------------------------|---------------------------------------------|
| Age (years, mean+/-SD, median)                       | 65 +/-12, 65                                |
| Gender (n, %)                                        |                                             |
| Male                                                 | 2966 97.6%                                  |
| Ethnicity (n, %)                                     |                                             |
| African American                                     | 414 13.6%                                   |
| Caucasian                                            | 670 22.0%                                   |
| Hispanic                                             | 44 1.45%                                    |
| Other                                                | 341 11.2%                                   |
| Not documented                                       | 1570 51.7%                                  |
| Baseline serum creatinine (mg/dL, mean+/-SD, median) | Mean+/-SD, Median                           |
| Overall (n=3,039)                                    | Overall: Overall: 1.28 +/- 0.86, 1.10       |
| Group 1 : < 1.5mg/dL (n=2,497)                       | Group 1 : < 1.5mg/dL = 1.05 +/-0.19, 1.03   |
| Group 2 : 1.5-2.0 mg/dL (n=377)                      | Group 2 : 1.5-2.0 mg/dL = 1.67 +/-0.16, 1.6 |
| Group 3 : > 2 mg/dL (n=165)                          | Group 3 : > 2 mg/dL = 3.75+/-2.44, 2.7      |

---

| Co-morbidities (n, %)   | n    | %      |
|-------------------------|------|--------|
| Diabetes Mellitus       | 866  | 28.5 % |
| Hypertension            | 1343 | 44.2 % |
| Chronic Heart Failure   | 177  | 5.8 %  |
| Coronary Artery Disease | 445  | 14.6 % |
| Gout                    | 69   | 2.3 %  |
| SBP <100 mmHg           | 88   | 2.9 %  |
| Concomitant Use of:     |      |        |
| NSAIDs                  | 1053 | 34.6 % |
| Diuretics (total)       | 1771 | 58.3 % |
| Loops                   | 773  | 25.4 % |
| Thiazides               | 1264 | 41.6 % |
| K- sparing              | 239  | 7.9 %  |
| Beta-blockers           | 1601 | 52.7 % |

---

\*Values are reported as mean +/- SD; median unless otherwise noted

**Table 2. Multivariate odds ratios for discontinuation of angiotensin-converting enzyme inhibitors subsequent to elevation of SCr post-ACEI initiation**

| Co morbidities          | Multivariate<br>Odds Ratio<br>(95% CI) | P value |
|-------------------------|----------------------------------------|---------|
| Age                     | 1.00(1.00-1.00)*                       | 0.452   |
| Gender (Male)           | 0.74 (0.57-0.97)                       | 0.028   |
| Coronary Artery Disease | 0.89 (0.79-1.01)                       | 0.061   |
| Chronic Heart Failure   | 0.79 (0.63-0.99)                       | 0.041   |
| SBP <100mmHg            | 0.55 (0.40-0.76)                       | <0.001  |
| Concomitant use of:     |                                        |         |
| NSAIDs                  | 1.23(1.13-1.34)                        | <0.001  |
| Diuretics               | 1.07( 0.87-1.31)                       | <0.001  |
| Thiazides               | 1.18 (0.98-1.42)                       | 0.084   |
| Loops                   | 0.99 (0.84-1.18)                       | 0.925   |
| Beta-blockers           | 1.17( 1.08-1.27)                       | <0.001  |

\* Values rounded from 0.999( 0.995-1.002)

**Table 3. Distribution in magnitude of elevation of serum creatinine in patients who discontinued angiotensin-converting enzyme inhibitors within 90 days post-initiation**

| Threshold of increase in SCr | Group 1<br>< 1.5mg/dL<br>n=135            | Group 2<br>1.5-2mg/dL<br>n=28          | Group 3<br>> 2mg/dL<br>n=19              | P value |
|------------------------------|-------------------------------------------|----------------------------------------|------------------------------------------|---------|
| ≤ 0.5mg/dL increase          | 124 (91.85)<br>0.17 +/-0.11; 0.10         | 25(89.29)<br>0.18+/- 0.8; 0.17         | 8 (42.10)<br>0.27+/- 0.14; 0.3           | <0.001  |
| > 0.5mg/dL increase          | 11 (8.15)<br>1.23 +/- 0.99; 0.80          | 3 (10.71)<br>0.87 +/-0.25; 0.9         | 11 (57.90)<br>2.95 +/- 2.93; 1.7         | <0.001  |
| ≤ 30% increase               | 114 (84.45)<br>14.15%+/- 6.85%;<br>11.11% | 25 (89.29)<br>10.22%+/- 4.6%;<br>9.25% | 12 (63.15)<br>12.82%+/-6.64%;<br>12.99%  | 0.01    |
| > 30% increase               | 21 (15.55)<br>89.25%+/-81.07%;<br>46.67%  | 3 (10.71)<br>45.83% +/- 8.78%;<br>45%  | 7 (36.85)<br>100.32%+/-69.10%;<br>88.23% | <0.001  |

\*Values are n (%) and mean+/- SD; median

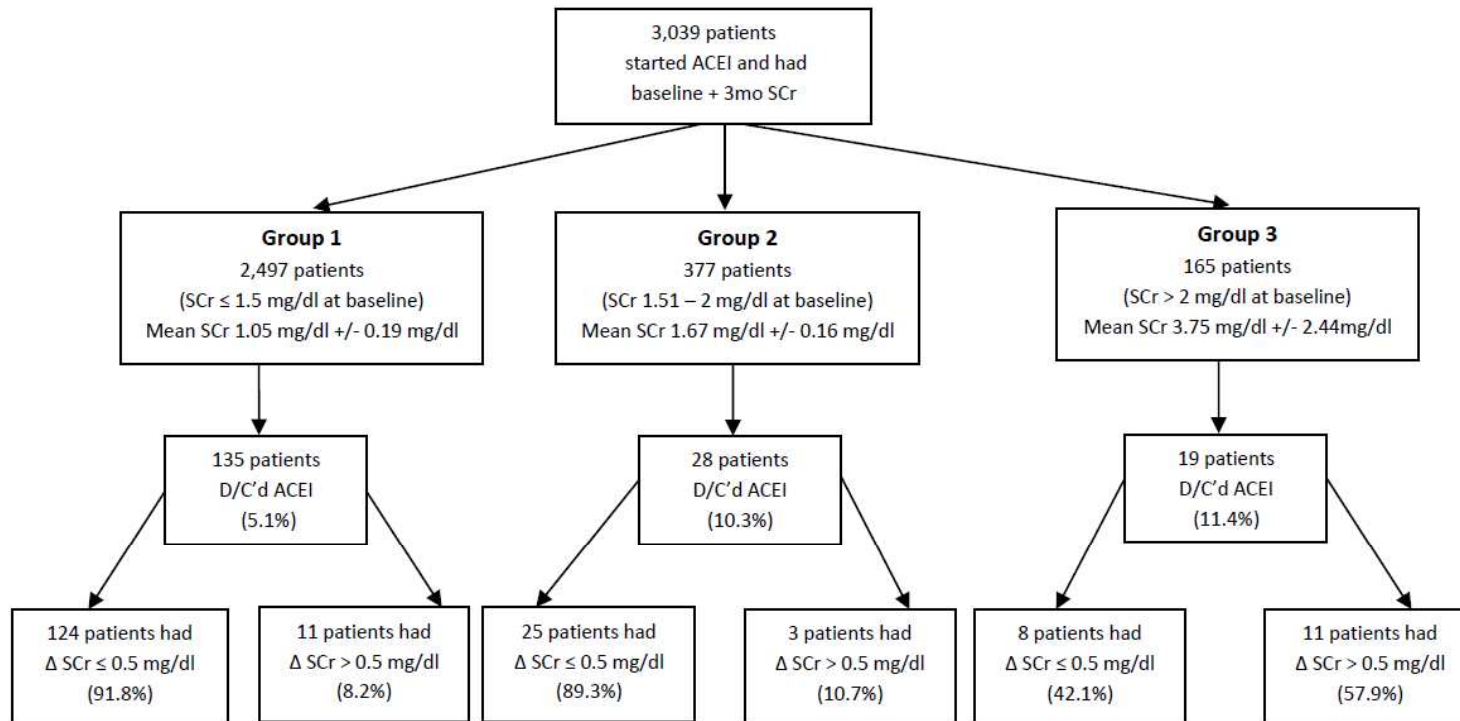

Figure1. Profile of patients included in analysis.  
ACEI: Angiotensin-Converting Enzyme Inhibitors; ADR: Adverse Drug Reaction; DIC'd: discontinued; SCr: Serum Creatinine.

Figure 2: Changes in Serum Creatinine at 1 Year for Patients with SCr >2 mg/dL

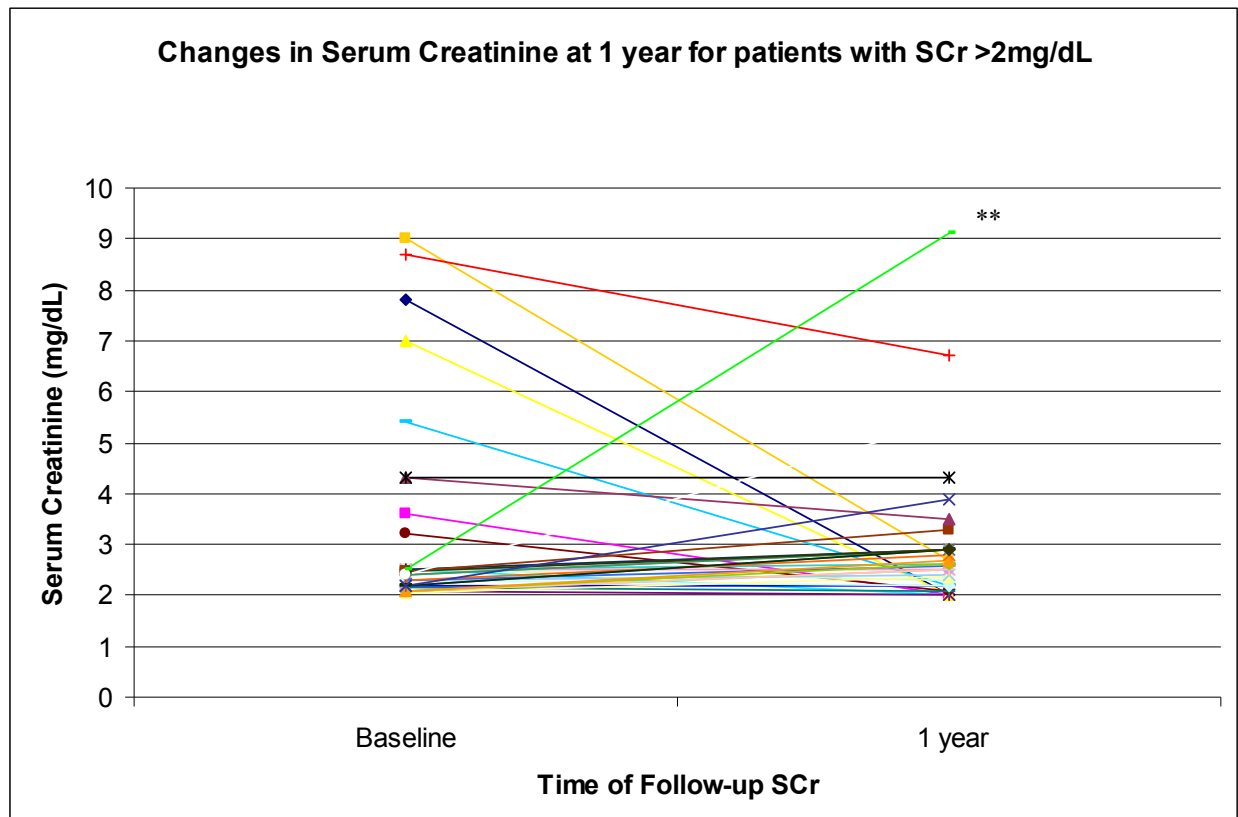

\*The mean change in serum creatinine was  $-0.24 \pm 0.56$  mg/dL with a median of  $-0.01$  mg/dL. Excluding outlier (\*\*), resulted in a mean in change serum creatinine of  $-0.44 \pm 1.96$  mg/dL with a median of  $-0.01$  mg/dL.

N= 35

## References

1. Hung SA, Abraham WT, Chin MH, et al. ACC/AHA 2005 guideline update for the diagnosis and management of chronic heart failure in the adult: a report of the American College of Cardiology/American Heart Association Task Force on Practice Guidelines (Writing Committee to Update the 2001 Guidelines for the Evaluation and Management of Heart Failure). American College of Cardiology Web Site. Available at: <http://www.acc.org/clinical/guidelines/failure//index.pdf>.
2. Antman EM, Anbe DT, Armstrong PW, et al. ACC/AHA Guidelines for the management of patients with ST-elevation myocardial infarction- Executive Summary. J Am Coll Cardiol 2004;44:671-7.
3. American Diabetes Association. Standards of Medical Care in Diabetes-2014. Diabetes Care 2014;37;S5-S13.
4. Marre M, Leblanc H, Suarez L, et al. Converting enzyme inhibition and kidney function in normotensive diabetic patients with persistent microalbuminuria. BMJ 1987;294:1448-52.
5. Chobanian AV, Bakris GL, Black HR, et al. The Seventh Report of the Joint National Committee on Prevention, Detection, Evaluation, and Treatment of High Blood Pressure. JAMA 2003;289:2560-72.
6. Matsuda H, Hayashi K, Arakawa K, et al. Zonal heterogeneity in action of angiotensin-converting enzyme inhibitor on renal microcirculation. J Am Soc Nephrol 1999;10:2272-82.
7. Ahmed A, Kiefe C, Allman R, et al. Survival benefits of angiotensin converting enzyme inhibitors in older heart failure patients with perceived contraindications. J Amer Ger Soc 2002;50:1659-66.

- 1  
2  
3 8. The CONSENSUS Trial Study Group. Effects of enalapril on mortality in severe congestive  
4 heart failure: results of the Cooperative North Scandinavian Enalapril Survival Study  
5 (CONSENSUS). *N Engl J Med* 1986;316:1429-35.  
6  
7
- 8 9. The SOLVD Investigators. Effects of enalapril on mortality and the development of heart  
9 failure in asymptomatic patients with reduced left ventricular ejection fractions. *N Engl J*  
10 *Med* 1987;325:293-302.  
11  
12
- 13 10. Ghali JK, Giles T, Gonzales M, et al. Patterns of physician use of angiotensin converting  
14 enzyme inhibitors in the inpatient treatment of congestive heart failure. *J. La State Med Soc*  
15 1997;149:474-84.  
16  
17
- 18 11. Hou FF, Zhang X, Zhang GH, et al. Efficacy and safety of benazepril for advanced chronic  
19 renal insufficiency. *N Engl J Med* 2006;354:131-40.  
20  
21
- 22 12. Schoolwerth AC, Sica D, Ballerma B, Wilcox C. Renal considerations in angiotensin  
23 converting enzyme inhibitor therapy: A statement of healthcare professional from the  
24 Council on the Kidney in Cardiovascular Disease and the Council of High Blood Pressure  
25 Research of the American Heart Association. *Circulation* 2001;104:1985-91.  
26  
27
- 28 13. Bakris GL, Weir MR. Angiotensin- converting enzyme inhibitor associated elevations in  
29 SCr. Is this a cause for concern? *Arch Intern Med* 2000;168:685-88.  
30  
31
- 32 14. Knight E, Glynn R, McIntyre K, et al. Predictors of decreased renal function in patients with  
33 heart failure during angiotensin-converting enzyme inhibitor therapy: results from the Studies  
34 of Left Ventricular Dysfunction (SOLVD). *Amer Heart J* 1999;138:849-55.  
35  
36
- 37 15. Ahmed A. Use of angiotensin-converting enzyme inhibitors in patients with heart failure and  
38 renal insufficiency: How concerned should we be by the rise in SCr. *J Amer Ger Soc*  
39 2002;50:1297-1300.  
40  
41  
42  
43  
44  
45  
46  
47  
48  
49  
50  
51  
52  
53  
54  
55  
56  
57  
58  
59  
60



16. Agusti A, Bonet S, Arnau J, et al. Adverse effects of ACE inhibitors in patients with chronic heart failure and/or ventricular dysfunction. *Drug Safety* 2003;26:895-908.
17. Raebel M, Lyons E, Andrade S, et al. Laboratory monitoring of drugs at initiation of therapy in ambulatory care. *J Gen Intern Med* 2005;20:1120-26.
18. Gurwitz JH, Field TS, Harrold LR, et al. Incidence and preventability of adverse drug events among older persons in the ambulatory setting. *JAMA* 2003;289:1107-16.
19. Raebel M, Lyons E, Chester E, et al. Randomized trial to improve safety monitoring of ongoing drug therapy in ambulatory patients. *Pharmacotherapy* 2006;5:626-29.
20. Hess D. Retrospective studies and chart reviews. *Respir Care* Oct 2004;49:1171-74.

STROBE 2007 (v4) Statement—Checklist of items that should be included in reports of cohort studies

| Section/Topic             | Item # | Recommendation                                                                                                                                                                       | Reported on page # |
|---------------------------|--------|--------------------------------------------------------------------------------------------------------------------------------------------------------------------------------------|--------------------|
| Title and abstract        | 1      | (a) Indicate the study’s design with a commonly used term in the title or the abstract                                                                                               | 1                  |
|                           |        | (b) Provide in the abstract an informative and balanced summary of what was done and what was found                                                                                  | 2                  |
| <b>Introduction</b>       |        |                                                                                                                                                                                      |                    |
| Background/rationale      | 2      | Explain the scientific background and rationale for the investigation being reported                                                                                                 | 3-4                |
| Objectives                | 3      | State specific objectives, including any prespecified hypotheses                                                                                                                     | 4                  |
| <b>Methods</b>            |        |                                                                                                                                                                                      |                    |
| Study design              | 4      | Present key elements of study design early in the paper                                                                                                                              | 5                  |
| Setting                   | 5      | Describe the setting, locations, and relevant dates, including periods of recruitment, exposure, follow-up, and data collection                                                      | 5-6                |
| Participants              | 6      | (a) Give the eligibility criteria, and the sources and methods of selection of participants. Describe methods of follow-up                                                           | 5-6                |
|                           |        | (b) For matched studies, give matching criteria and number of exposed and unexposed                                                                                                  | N/A                |
| Variables                 | 7      | Clearly define all outcomes, exposures, predictors, potential confounders, and effect modifiers. Give diagnostic criteria, if applicable                                             | 6                  |
| Data sources/ measurement | 8*     | For each variable of interest, give sources of data and details of methods of assessment (measurement). Describe comparability of assessment methods if there is more than one group | 5                  |
| Bias                      | 9      | Describe any efforts to address potential sources of bias                                                                                                                            | 6                  |
| Study size                | 10     | Explain how the study size was arrived at                                                                                                                                            | 5                  |
| Quantitative variables    | 11     | Explain how quantitative variables were handled in the analyses. If applicable, describe which groupings were chosen and why                                                         | 6                  |
| Statistical methods       | 12     | (a) Describe all statistical methods, including those used to control for confounding                                                                                                | 6                  |
|                           |        | (b) Describe any methods used to examine subgroups and interactions                                                                                                                  | N/A                |
|                           |        | (c) Explain how missing data were addressed                                                                                                                                          | N/A                |
|                           |        | (d) If applicable, explain how loss to follow-up was addressed                                                                                                                       | 6                  |
|                           |        | (e) Describe any sensitivity analyses                                                                                                                                                | N/A                |
| <b>Results</b>            |        |                                                                                                                                                                                      |                    |

|                          |     |                                                                                                                                                                                                              |            |
|--------------------------|-----|--------------------------------------------------------------------------------------------------------------------------------------------------------------------------------------------------------------|------------|
| Participants             | 13* | (a) Report numbers of individuals at each stage of study—eg numbers potentially eligible, examined for eligibility, confirmed eligible, included in the study, completing follow-up, and analysed            | 8,18       |
|                          |     | (b) Give reasons for non-participation at each stage                                                                                                                                                         | N/A        |
|                          |     | (c) Consider use of a flow diagram                                                                                                                                                                           | N/A        |
| Descriptive data         | 14* | (a) Give characteristics of study participants (eg demographic, clinical, social) and information on exposures and potential confounders                                                                     | 8,14-15    |
|                          |     | (b) Indicate number of participants with missing data for each variable of interest                                                                                                                          | N/A        |
|                          |     | (c) Summarise follow-up time (eg, average and total amount)                                                                                                                                                  | 8,18       |
| Outcome data             | 15* | Report numbers of outcome events or summary measures over time                                                                                                                                               | 8-9,17     |
| Main results             | 16  | (a) Give unadjusted estimates and, if applicable, confounder-adjusted estimates and their precision (eg, 95% confidence interval). Make clear which confounders were adjusted for and why they were included | 8-10,17    |
|                          |     | (b) Report category boundaries when continuous variables were categorized                                                                                                                                    | 8-10,14-17 |
|                          |     | (c) If relevant, consider translating estimates of relative risk into absolute risk for a meaningful time period                                                                                             | N/A        |
| Other analyses           | 17  | Report other analyses done—eg analyses of subgroups and interactions, and sensitivity analyses                                                                                                               | N/A        |
| <b>Discussion</b>        |     |                                                                                                                                                                                                              |            |
| Key results              | 18  | Summarise key results with reference to study objectives                                                                                                                                                     | 8-10       |
| <b>Limitations</b>       |     |                                                                                                                                                                                                              |            |
| Interpretation           | 20  | Give a cautious overall interpretation of results considering objectives, limitations, multiplicity of analyses, results from similar studies, and other relevant evidence                                   | 11-13      |
| Generalisability         | 21  | Discuss the generalisability (external validity) of the study results                                                                                                                                        | 13         |
| <b>Other information</b> |     |                                                                                                                                                                                                              |            |
| Funding                  | 22  | Give the source of funding and the role of the funders for the present study and, if applicable, for the original study on which the present article is based                                                | 20         |

\*Give information separately for cases and controls in case-control studies and, if applicable, for exposed and unexposed groups in cohort and cross-sectional studies.

**Note:** An Explanation and Elaboration article discusses each checklist item and gives methodological background and published examples of transparent reporting. The STROBE checklist is best used in conjunction with this article (freely available on the Web sites of PLoS Medicine at <http://www.plosmedicine.org/>, Annals of Internal Medicine at <http://www.annals.org/>, and Epidemiology at <http://www.epidem.com/>). Information on the STROBE Initiative is available at [www.strobe-statement.org](http://www.strobe-statement.org).

# BMJ Open

## Rates and Predictors of Angiotensin-Converting Enzyme Inhibitor Discontinuation Subsequent to Elevated Serum Creatinine: A Retrospective Cohort Study

|                                 |                                                                                                                                                                                                                                                                                           |
|---------------------------------|-------------------------------------------------------------------------------------------------------------------------------------------------------------------------------------------------------------------------------------------------------------------------------------------|
| Journal:                        | <i>BMJ Open</i>                                                                                                                                                                                                                                                                           |
| Manuscript ID:                  | bmjopen-2014-005181.R1                                                                                                                                                                                                                                                                    |
| Article Type:                   | Research                                                                                                                                                                                                                                                                                  |
| Date Submitted by the Author:   | 17-Jun-2014                                                                                                                                                                                                                                                                               |
| Complete List of Authors:       | Jackevicius, Cynthia; Western University of Health Sciences, Wong, Joyce; Western University of Health Sciences, Aroustamian, Irina; Western University of Health Sciences, Gee, Manyee; VA Greater Los Angeles Healthcare System, Mody, Freny; VA Greater Los Angeles Healthcare System, |
| <b>Primary Subject Heading</b>: | General practice / Family practice                                                                                                                                                                                                                                                        |
| Secondary Subject Heading:      | Pharmacology and therapeutics                                                                                                                                                                                                                                                             |
| Keywords:                       | INTERNAL MEDICINE, Adverse events < THERAPEUTICS, Chronic renal failure < NEPHROLOGY                                                                                                                                                                                                      |
|                                 |                                                                                                                                                                                                                                                                                           |

SCHOLARONE™  
Manuscripts

# Rates and Predictors of Angiotensin-Converting Enzyme Inhibitor Discontinuation

## Subsequent to Elevated Serum Creatinine: A Retrospective Cohort Study

Cynthia A. Jackevicius, BScPhm, MSc, PharmD<sup>1, 2, 3, 4, 5</sup>, Joyce Wong, PharmD<sup>1</sup>, Irina Aroustamian, PharmD<sup>1</sup>, Manyee Gee, PhD<sup>2</sup>, Freny Vaghaiwalla Mody, MD FACC<sup>2, 6</sup>

Department of Pharmacy Practice and Administration, Western University of Health Sciences<sup>1</sup>, Department of Medicine & Pharmacy, Veteran Affairs Greater Los Angeles Healthcare System<sup>2</sup>, Institute of Health Policy, Management and Evaluation, Faculty of Medicine, University of Toronto<sup>3</sup>, Institute for Clinical Evaluative Sciences<sup>4</sup>, Department of Pharmacy, University Health Network<sup>5</sup>, Division of Cardiology, Department of Medicine, David Geffen School of Medicine, University of California Los Angeles<sup>6</sup>

Corresponding author:

Freny Vaghaiwalla Mody, MD

VA Greater Los Angeles Healthcare System & David Geffen School of Medicine at UCLA

Phone: 310-268-3839 Fax: 310-268-4391 Email: freny.mody@va.gov

Running Title: Predictors of ACEI Discontinuation

Word count: 2714

**Key Words:** ACE inhibitors, serum creatinine, renal dysfunction, drug utilization, chronic kidney disease

## Abstract

Objectives: Angiotensin-converting enzyme inhibitors (ACEI) are underutilized despite cardiovascular benefits, in part due to concerns of known transient elevations in serum creatinine (SCr) after initiation. Our objectives were to evaluate rates and predictors of ACEI discontinuation after SCr elevation post-ACEI initiation since limited data are available that examine this issue.

Setting: Primary and tertiary Veterans healthcare system in Los Angeles, California

Participants: 3,039 outpatients initiating an ACEI with a SCr measured within 6 months prior to and approximately 3 months after initiating an ACEI. Patients were divided into 3 groups (SCr<1.5, 1.5-2.0 and >2.0).

Primary and Secondary Outcome Measures: Rates and factors associated with ACEI discontinuation subsequent to SCr elevation after ACEI initiation and for patients with baseline SCr>2mg/dL, the change in SCr associated with chronic use. Predictors were identified using multivariate logistic regression modeling.

Results: At 3 months follow-up, for those with an increase in SCr, the mean increase post-ACEI initiation was 26%, ranging from -0.01 mg/dL to 0.42 mg/dL varying according to level of baseline renal function. ACEI discontinuation was higher in patients with elevated baseline SCr (19/165, 11.5%) compared with those with SCr<1.5 (135/2,497, 5.4%), and those with SCr 1.5-2.0 (28/377, 7.4%). Male patients, and those with heart failure were less likely to discontinue ACEI after an elevation of serum creatinine post-ACEI initiation, while those taking NSAIDs, diuretics and beta-blockers were more likely to discontinue ACEI.

Conclusions: Serum creatinine increases <30% on average within 3 months of ACEI initiation,

1  
2  
3 with subsequent discontinuation rates varying by baseline SCr. Elevation in SCr was not  
4  
5 associated with ACEI discontinuation rates. In patients with SCr>2 mg/dL at baseline, despite an  
6  
7 acute increase in SCr after ACEI initiation, chronic ACEI use was associated with a decrease in  
8  
9 SCr in most patients.  
10  
11  
12  
13  
14  
15  
16  
17  
18  
19  
20  
21  
22  
23  
24  
25  
26  
27  
28  
29  
30  
31  
32  
33  
34  
35  
36  
37  
38  
39  
40  
41  
42  
43  
44  
45  
46  
47  
48  
49  
50  
51  
52  
53  
54  
55  
56  
57  
58  
59  
60

For peer review only

## Article Summary

### Strengths and Limitations of this Study

- To date, no studies have evaluated both the acute elevation in serum creatinine post-ACE inhibitor initiation and the predictors of subsequent discontinuation following an elevated serum creatinine.
- This study confirmed the mean increase in serum creatinine after ACE inhibitor initiation is 26%, varying with baseline renal function.
- Factors other than elevation in serum creatinine were associated with ACE inhibitor discontinuation, including, female sex, absence of heart failure, and use of NSAIDs, diuretics or beta-blockers.



## Introduction

Current guidelines recommend angiotensin-converting enzyme inhibitors (ACEIs) as the standard of therapy for post-myocardial infarction, chronic heart failure (CHF), and diabetes due to the substantial endothelial, cardiovascular and renal protection.<sup>1-4</sup> Furthermore, ACEIs have also been shown to be a beneficial therapy for hypertension.<sup>5</sup> The renal protective mechanism of ACEIs vary, ranging from improving vascular endothelium function to vasodilatation effects.<sup>6</sup> Despite evidence from numerous trials showing the benefits of improved morbidity and mortality by ACEIs, these drugs are still underutilized.<sup>1-4, 7-10</sup> Clinicians are reluctant to start and continue with adequate dosing of ACEIs primarily due to concerns of elevations in serum creatinine (SCr), particularly in patients with CKD despite evidence that this group of patients benefits from ACEI.<sup>10,11</sup> The most probable cause of an acute elevation in SCr post-ACEI initiation is the decrease in vasoconstriction in the efferent arterioles resulting in pressure reduction in the glomerular apparatus and decreased glomerular filtration rate (GFR).<sup>6</sup> However, homeostasis of hemodynamics occurs with long-term use with gradual return and improvement in GFR.<sup>7</sup> Even with concerns of an acute rise in SCr, ACEIs provide long-term benefits with some data suggesting an improvement in renal function with decrease in SCr with long-term use.<sup>7,11,12</sup> In heart failure (HF) patients, RCTs estimate that between 2.4% and 16% of patients experience an acute increase in SCr of > 0.5mg/dL after ACEI initiation, with improvement with chronic use.<sup>8-9</sup> In a practice-based setting, Bakris and colleagues demonstrated a mean increase in SCr of 30% in a hypertensive population using ACEIs with the increase stabilizing within 2 months after ACEI initiation. This rise in SCr is proportional to the baseline SCr, such that a 30% increase at a SCr of 2 would be 2.6 while at a SCr of 1, it would be only 1.3, it is reversible upon discontinuation, and it is less likely to occur beyond 4 weeks of initiation.<sup>13,14</sup> HF patients suffer

1  
2  
3 a more pronounced increase in SCr with ACEIs due to a reduction of blood flow to the kidneys  
4  
5 from reduced cardiac output, diuretic use, and vasodilation effect. Although the acute increase in  
6  
7 SCr seen in HF patients ranges from 75% to 200% from baseline after ACEI initiation, this  
8  
9 elevation was suggested as being acceptable since ACEIs have proven benefits in decreasing  
10  
11 mortality in this population.<sup>8,15</sup>  
12  
13

14  
15 The frequency of the discontinuation rate of ACEI and the determinant factors associated  
16  
17 with discontinuation in the real world setting has not been fully characterized. The  
18  
19 CONSENSUS II HF trial reported a discontinuation rate of 4.6% with enalapril subsequent to the  
20  
21 rise of SCr, while a meta-analysis of randomized controlled trials of HF patients found an ACEI  
22  
23 discontinuation rate of 13.8%, of which only 0.4% was attributed to an increase in SCr.<sup>7,16</sup>  
24  
25  
26

27 To date, no studies have evaluated both the acute elevation in SCr post-ACEI initiation  
28  
29 and the predictors of subsequent discontinuation following an elevated SCr. Assessment of these  
30  
31 patterns may provide insight into clinician decision making in a real world setting. The objective  
32  
33 of our study was to assess the rates and predictors of ACEI discontinuation following an increase  
34  
35 in SCr post-ACEI initiation, each according to baseline renal function.  
36  
37  
38  
39  
40  
41  
42  
43  
44  
45  
46  
47  
48  
49  
50  
51  
52  
53  
54  
55  
56  
57  
58  
59  
60

## Methods

We conducted a retrospective observational cohort study of all outpatients initiating an ACEI between 2002 and 2004 at the Veterans Affairs Greater Los Angeles Healthcare System (VAGLAHS). The Veterans Health Information System and Technology Architecture (VISTA) database was used to gather patient information (demographics, medication use, allergies, comorbidities, and lab results).

Initiation of ACEI was defined as the dispensing of an outpatient prescription for an ACEI with no previous record of ACEI use in the past 6 months. The following ACEI information was collected: initiation date, discontinuation date, adverse drug reactions (ADR), dosage, dosing frequency and the total daily dose. To determine the prevalence of a change in SCr, SCr was recorded at baseline (within 6 months of ACEI initiation) and 3-months (10-14 weeks) post-initiation. If SCr data was not available between 10-14 weeks (3 months), the data value of the most proximal assay was recorded. A 0.5mg/dL increase and 30% increase in SCr was considered to be clinically important since several studies have used this as a reference point to define a decrease in renal function.<sup>5-6,14</sup> Discontinuation of ACEI was defined as no refills within 90 days after the last filled prescription which allowed a lenient grace period for patients obtaining late refills. Patients were stratified into three baseline SCr groups (group 1: SCr <1.5mg/dL; group 2: 1.6-2.0mg/dL; and group 3: >2.0mg/dL) for analysis. We assessed above and below 0.5mg/dL and 30% to determine the threshold at which discontinuation occurred and to analyze possible differences in threshold by group. For those patients with a baseline SCr >2mg/dL and continued on an ACEI, SCr was recorded at 1-year to detect any changes post-initiation. Comorbidities (defined by ICD-9 codes: 425-cardiomyopathy, 428-congestive heart failure, 250-diabetes, 410-414-coronary artery disease, 274-gout, 401-hypertension) and

1  
2  
3 concurrent use of NSAIDs, diuretics, and beta-blockers were documented to determine potential  
4 factors associated with an increase in SCr and the discontinuation of ACEIs. Concomitant  
5 medication use was defined as having an active prescription within 1 month of the index date of  
6 ACEI prescription through the time of discontinuation.  
7  
8  
9  
10  
11

12 The endpoints of this study were: the proportion of patients with a significant increase in  
13 SCr post-ACEI initiation at 3-months follow-up defined as  $>0.5\text{mg/dL}$  or  $>30\%$  of baseline by  
14 group; the proportion of patients with ACEI discontinued following a rise in SCr by group; the  
15 threshold of increase in SCr associated with ACEI discontinuation, stratified by baseline SCr  
16 groups; factors (patient characteristics, comorbidities, and concurrent medications) that may be  
17 associated with discontinuation of ACEIs; and the change in SCr in patients with baseline SCr  
18  $>2\text{mg/dL}$  and continued on ACEIs for 1 year.  
19  
20  
21  
22  
23  
24  
25  
26  
27  
28

29 Continuous baseline characteristics were expressed as the mean  $\pm$ SD or median; and  
30 categorical baseline characteristics were expressed as a proportion. Chi square test was used to  
31 compare the discontinuation rate after detecting a rise in SCr post-ACEI use between groups and  
32 to compare the threshold of increase in SCr prior to discontinuation between groups. A multiple  
33 logistic regression model was constructed to identify the factors associated with SCr elevation  
34 subsequent to ACEI initiation and ACEI discontinuation. The univariate model included patient  
35 characteristics (i.e., age, gender), comorbidities (i.e., diabetes, hypertension, coronary artery  
36 disease, chronic heart failure, systolic blood pressure (SBP) $<100\text{mmHg}$ , gout), concomitant  
37 NSAID use, diuretic use (i.e. thiazide, loop,  $\text{K}^+$  sparing), beta-blocker use, and significant SCr  
38 elevation defined as  $>0.5\text{mg/dL}$  or  $>30\%$  of baseline. Variables with  $p < 0.2$  from the univariate  
39 model were placed in a multiple logistic regression model using stepwise selection. Odds ratio  
40 with 95% confidence interval were estimated from the regression model. A p-value  $< 0.05$  was  
41  
42  
43  
44  
45  
46  
47  
48  
49  
50  
51  
52  
53  
54  
55  
56  
57  
58  
59  
60

1  
2  
3 considered statistically significant. All results were analyzed using SAS [Version 8.2, SAS  
4  
5  
6 Institute, Cary, NC]. This was a non-funded study approved by the institutional review board at  
7  
8 VAGLAHS and Western University of Health Sciences.  
9  
10  
11  
12  
13  
14  
15  
16  
17  
18  
19  
20  
21  
22  
23  
24  
25  
26  
27  
28  
29  
30  
31  
32  
33  
34  
35  
36  
37  
38  
39  
40  
41  
42  
43  
44  
45  
46  
47  
48  
49  
50  
51  
52  
53  
54  
55  
56  
57  
58  
59  
60

For peer review only

## Results

1  
2  
3  
4  
5  
6  
7  
8  
9  
10  
11  
12  
13  
14  
15  
16  
17  
18  
19  
20  
21  
22  
23  
24  
25  
26  
27  
28  
29  
30  
31  
32  
33  
34  
35  
36  
37  
38  
39  
40  
41  
42  
43  
44  
45  
46  
47  
48  
49  
50  
51  
52  
53  
54  
55  
56  
57  
58  
59  
60

A total of 3,039 patients were initiated on an ACEI between January 2002 and December 2004 and had a SCr measured within 6 months prior to and 3 months after initiating an ACEI. (Figure 1) The average age was 65.0 years and 97.6% were male with a baseline SCr of 1.28 $\pm$ 0.86 mg/dL. Patients were stratified into three groups based on baseline SCr: Group 1 consisted of 2,497 patients with a SCr of <1.5 mg/dL (mean of 1.05 $\pm$ 0.19); group 2 had 377 patients with a SCr of 1.5-2.0 mg/dL (mean of 1.67  $\pm$ 0.16); and group 3 had 165 patients with a SCr of >2.0 mg/dL (mean of 3.75 $\pm$ 2.44). (Figure 1) Hypertension (44.2%) and diabetes (28.5%) were the most frequently documented comorbidities, and the most common concomitant medications were diuretics and beta-blockers. (Table 1)

On average, patients had a follow-up SCr available at a median of 3.8 months post-ACEI initiation. The mean changes in SCr at 3 months follow-up most proximal to the 3-month interval were 0.05  $\pm$ 0.30 mg/dL, -0.01 $\pm$ 0.31 mg/dL, and 0.42  $\pm$ 2.20 mg/dL respectively, by group ( $p>0.05$  vs. baseline for all groups). There was no change in median SCr at 3 months follow-up for all three groups. Counting only those patients with an increase in SCr for all 3 groups, based on an increase from baseline SCr ( $n=182$ ), the average percent increase in SCr prior to ACEI discontinuation was 25.98%  $\pm$ 41.72 with a median of 13.49%.

At 3 months, the discontinuation rate of ACEI with or without concomitant SCr rise of >0.5mg/dL was highest in group 3 (11.5%), followed by group 2 (7.4%) and group 1 (5.4%) ( $p<0.001$ ) (Figure 1). In the multiple logistic regression model the variables significantly associated with a greater likelihood of ACEI discontinuation were the use of NSAIDs, diuretics, and beta-blockers. (Table 2) Of note, a significant increase in SCr (defined as >0.5mg/dl or >30 %) was not associated with ACEI discontinuation. ( $p=0.498$  in the univariate model). A history of CHF,

1  
2  
3 SBP of <100mmHg at baseline and male sex were significantly associated with a reduced  
4  
5 likelihood of ACEI discontinuation.  
6  
7

8 Changes in SCr were further evaluated based on absolute and percent change. Table 3  
9  
10 depicts the change in SCr prior to ACEI discontinuation, at the threshold of 0.5mg/dL and 30%  
11  
12 increase in SCr (in 182 patients [5.9%] of all patients initiated on ACEI who had an increase in  
13  
14 SCr). Group 3 had the highest mean increase in SCr as both absolute and percent change. A  
15  
16 majority of the patients who experienced an increase in SCr had a change less than both 30%  
17  
18 increase and 0.5mg/dL increase prior to discontinuation. Thus, most ACEI discontinuation did  
19  
20 not occur following a clinically significant increase in SCr (>30% or >0.5mg/dL above baseline).  
21  
22  
23

24  
25 Of the 165 patients with a baseline SCr >2.0mg/dL (mean 3.75+/-2.44), only 50 patients  
26  
27 (30.3%) were continued on an ACEI at 1 year. A total of 69 of the 165 (41.8%) patients  
28  
29 experienced a decrease in SCr prior to discontinuation (average decrease was 1.04 +/- 1.77) and  
30  
31 76 (46.0%) of the patients experienced an increase (average increase was 1.86+/-0.87) and 20  
32  
33 (12.1%) patients experienced no change from baseline prior to discontinuation. Of the 50  
34  
35 patients who continued on ACEIs, only 35 patients had a follow-up in SCr at 1 year and their  
36  
37 mean decrease in SCr was -0.24 +/-0.56 with a median decrease of -0.01mg/dL. Of these 35  
38  
39 patients, one (2.86%) had a larger increase in SCr (from 2.5 to 9.1 mg/dL) as compared with the  
40  
41 remaining patients in the group (Figure 2). Excluding this subject as an outlier with a rise in SCr  
42  
43 at 1 year that is unlikely due to ACEI, resulted in a mean decrease in SCr at 1 year in group 3 of -  
44  
45 0.44+/-1.96 with a median of -0.01mg/dL. While the majority (54.28%) of patients in Group 3  
46  
47 experienced a clinically significant absolute (>0.5 mg/dL) increase in SCr of 0.98+/-1.58  
48  
49 compared with a baseline of 3.75+/-2.44, the 27% relative increase was not above the generally  
50  
51 accepted threshold of >30%. Forty percent of this group experienced a decrease in SCr of  
52  
53  
54  
55  
56  
57  
58  
59  
60

1  
2  
3 1.19+/-2.26 compared to baseline 3.75+/-2.44 and 5.7% had no change in SCr at 1-year follow-  
4  
5 up. The average magnitude of decrease in SCr was greater than the average magnitude of  
6  
7 increase in SCr with long term use of ACEI (1.19+/-2.26 mg/dL decrease versus 0.98 +/-  
8  
9 1.58mg/dL increase, p<0.001) in patients with SCr>2 mg/dL.  
10  
11  
12  
13  
14  
15  
16  
17  
18  
19  
20  
21  
22  
23  
24  
25  
26  
27  
28  
29  
30  
31  
32  
33  
34  
35  
36  
37  
38  
39  
40  
41  
42  
43  
44  
45  
46  
47  
48  
49  
50  
51  
52  
53  
54  
55  
56  
57  
58  
59  
60

For peer review only



## Discussion

In our study, which had a large hypertensive population, we showed an increase in SCr of approximately 26% post-ACEI initiation, for those with an increase in SCr. Previous studies have documented similar acute increases in SCr of 30% in hypertensive patients and up to 200% in HF patients.<sup>13,14</sup> It has been suggested that ACEI discontinuation be considered if an increase in SCr exceeds 30% with ACEI use since renal function may be compromised beyond this increase and the benefits of ACEI may not outweigh the risks.<sup>13</sup> Our study showed that the majority of ACEI discontinuation occurred with an increase of less than 30% in SCr, thus suggesting that the threshold of concern for renal deterioration is lower in clinical practice or other factors may be more likely associated with discontinuation.

According to previous trials, a change in SCr of >0.5mg/dL may also be considered clinically significant.<sup>8,9</sup> The majority of the patients that discontinued ACEI in our study experienced a <0.5mg/dL change in SCr. Our study further suggested that on average, SCr was not greatly affected by ACEI since all three groups had no change in median SCr over 3 months. Thus, the discontinuation of ACEI in our population was most likely attributed to drug intolerances, such as, cough, other comorbidities, and concomitant medications, rather than the change in SCr. Only 6% of patients in the lower baseline SCr group suffered from documented cough or nausea leading to the discontinuation of ACEI. The adjusted regression analysis demonstrated that concomitant use of NSAIDs, diuretics, and beta-blockers were factors associated with a higher likelihood of ACEI discontinuation. This may be anticipated since both NSAIDs and diuretics have been documented to decrease renal function and exacerbate SCr elevations when used concomitantly with ACEI.<sup>12</sup> However, this may have led to the discontinuation of ACEI at a lower threshold of SCr increase. If discontinuation of ACEI was

1  
2  
3 indeed at a lower threshold than that traditionally accepted (SCr rise >0.5 or 30%), improved  
4 awareness for clinicians of the short duration of an acute rise in SCr when initiating ACEI, and  
5  
6 dose reduction or reassessment of need for concomitant NSAIDs or diuretics may be beneficial  
7  
8 strategies. This may confer better clinical outcomes for patients, particularly diabetic patients  
9  
10 who would benefit from the nephroprotective actions of ACEI. Contrary to previous findings,  
11  
12 beta-blockers were associated with a higher likelihood of discontinuation with concomitant use  
13  
14 of ACEI in our study rather than exerting a renoprotective effect with ACEI use.<sup>14</sup> Male sex,  
15  
16 CHF history, and SBP of <100mmHg were also associated with a lower chance of ACEI  
17  
18 discontinuation. We postulated that patients with CHF and SBP <100mmHg were more likely to  
19  
20 be maintained on an ACEI since HF studies have documented benefits of ACEI in decreasing  
21  
22 morbidity and mortality.<sup>1,7-8</sup>  
23  
24  
25  
26  
27  
28

29 In patients with baseline SCr >2 mg/dL, our study showed that SCr can increase,  
30  
31 decrease, or remain unchanged with long term ACEI use. Even though the majority of these  
32  
33 patients experienced an acute increase in SCr, our results support ACEI use in renal impaired  
34  
35 patients since the median change in SCr decreased and in the long term, the magnitude of  
36  
37 decrease was much more impressive than the magnitude of increase. Our study is consistent  
38  
39 with the prospective findings by Hou et al and retrospective findings by Hirsch et al, who both  
40  
41 found that despite the acute increase in SCr, long term improvement in SCr occurs in many  
42  
43 patients with impaired renal function at baseline.<sup>11,15,16</sup> The use of ACEI is warranted in this  
44  
45 group of patients, along with close monitoring of renal function and electrolytes since benefits  
46  
47 were documented in this study as well as in previous studies.<sup>11-12,17-20</sup>  
48  
49  
50  
51  
52

53 Limitations of our study include its retrospective study design with potential for  
54  
55 confounding.<sup>21</sup> Given our VA population, the vast majority of patients were male, limiting  
56  
57  
58  
59  
60

1  
2  
3 generalizability to female patients. In addition, the electronic medical records may not be  
4 complete and accurate as is a limitation of any study relying on retrospective medical chart  
5 extraction. Finally, the sample size of patients with SCr >2 mg/dL was small both pre- and post-  
6 follow-up of SCr. However, the large population-based sample increases the generalizability of  
7 the findings.  
8  
9

10  
11  
12  
13  
14  
15 Many clinicians may be reluctant to prescribe ACEIs to all eligible patients due to  
16 concerns of an elevation in SCr. Based on this real world study, the magnitude of increase in  
17 SCr post-ACEI initiation was slightly lower than the commonly used threshold of 30%. We  
18 found that, instead of a clinically meaningful rise in SCr, ACEI discontinuation may be more  
19 likely associated with either comorbidities, concomitant medications that may increase SCr, or a  
20 low threshold of concern for SCr elevations. Identification of other factors that may increase  
21 SCr, such as, NSAID use, diuretic use, and volume depletion should be considered before an  
22 ACEI is discontinued. The importance of monitoring should be emphasized to detect any drastic  
23 increase in SCr >30% and to manage potential adverse drug reactions. Education may be  
24 required to change practice patterns in patients with impaired baseline renal function in order to  
25 confer the clinical benefit of chronic ACEI nephroprotection.  
26  
27  
28  
29  
30  
31  
32  
33  
34  
35  
36  
37  
38  
39  
40  
41  
42  
43  
44  
45  
46  
47  
48  
49  
50  
51  
52  
53  
54  
55  
56  
57  
58  
59  
60

**Author Contributions:**

Jackevicius: Concept/design, data interpretation, critical revision of article, approval of article, statistics

Wong: Design, data analysis/interpretation, drafting article, approval of article, statistics

Aroustamian: Data analysis, critical revision of article, approval of article, statistics

Gee: Data collection/interpretation, critical revision of article, approval of article

Mody: Concept/design, data interpretation, critical revision of article, approval of article

**Funding:** None.

**Data Sharing:** No additional data available.

**Acknowledgments:** None.

**Table 1. Baseline characteristics of cohort (n= 3,039)**

| Characteristic                                       | Value*                                      |
|------------------------------------------------------|---------------------------------------------|
| Age (years, mean+/-SD, median)                       | 65 +/-12, 65                                |
| Gender (n, %)                                        |                                             |
| Male                                                 | 2966 97.6%                                  |
| Ethnicity (n, %)                                     |                                             |
| African American                                     | 414 13.6%                                   |
| Caucasian                                            | 670 22.0%                                   |
| Hispanic                                             | 44 1.45%                                    |
| Other                                                | 341 11.2%                                   |
| Not documented                                       | 1570 51.7%                                  |
| Baseline serum creatinine (mg/dL, mean+/-SD, median) | Mean+/-SD, Median                           |
| Overall (n=3,039)                                    | Overall: Overall: 1.28 +/- 0.86, 1.10       |
| Group 1 : < 1.5mg/dL (n=2,497)                       | Group 1 : < 1.5mg/dL = 1.05 +/-0.19, 1.03   |
| Group 2 : 1.5-2.0 mg/dL (n=377)                      | Group 2 : 1.5-2.0 mg/dL = 1.67 +/-0.16, 1.6 |
| Group 3 : > 2 mg/dL (n=165)                          | Group 3 : > 2 mg/dL = 3.75+/-2.44, 2.7      |

---

| Co-morbidities (n, %)   | n    | %      |
|-------------------------|------|--------|
| Diabetes Mellitus       | 866  | 28.5 % |
| Hypertension            | 1343 | 44.2 % |
| Chronic Heart Failure   | 177  | 5.8 %  |
| Coronary Artery Disease | 445  | 14.6 % |
| Gout                    | 69   | 2.3 %  |
| SBP <100 mmHg           | 88   | 2.9 %  |
| Concomitant Use of:     |      |        |
| NSAIDs                  | 1053 | 34.6 % |
| Diuretics (total)       | 1771 | 58.3 % |
| Loops                   | 773  | 25.4 % |
| Thiazides               | 1264 | 41.6 % |
| K- sparing              | 239  | 7.9 %  |
| Beta-blockers           | 1601 | 52.7 % |

---

\*Values are reported as mean +/- SD; median unless otherwise noted

**Table 2. Multivariate odds ratios for discontinuation of angiotensin-converting enzyme inhibitors subsequent to elevation of SCr post-ACEI initiation**

| Co morbidities          | Multivariate<br>Odds Ratio<br>(95% CI) | P value |
|-------------------------|----------------------------------------|---------|
| Age                     | 1.00(1.00-1.00)*                       | 0.452   |
| Gender (Male)           | 0.74 (0.57-0.97)                       | 0.028   |
| Coronary Artery Disease | 0.89 (0.79-1.01)                       | 0.061   |
| Chronic Heart Failure   | 0.79 (0.63-0.99)                       | 0.041   |
| SBP <100mmHg            | 0.55 (0.40-0.76)                       | <0.001  |
| Concomitant use of:     |                                        |         |
| NSAIDs                  | 1.23(1.13-1.34)                        | <0.001  |
| Diuretics               | 1.07( 0.87-1.31)                       | <0.001  |
| Thiazides               | 1.18 (0.98-1.42)                       | 0.084   |
| Loops                   | 0.99 (0.84-1.18)                       | 0.925   |
| Beta-blockers           | 1.17( 1.08-1.27)                       | <0.001  |

\* Values rounded from 0.999( 0.995-1.002)

**Table 3. Distribution in magnitude of elevation of serum creatinine in patients who discontinued angiotensin-converting enzyme inhibitors within 90 days post-initiation**

| Threshold of increase in SCr | Group 1<br>< 1.5mg/dL<br>n=135            | Group 2<br>1.5-2mg/dL<br>n=28          | Group 3<br>> 2mg/dL<br>n=19              | P value |
|------------------------------|-------------------------------------------|----------------------------------------|------------------------------------------|---------|
| ≤ 0.5mg/dL increase          | 124 (91.85)<br>0.17 +/-0.11; 0.10         | 25(89.29)<br>0.18+/- 0.8; 0.17         | 8 (42.10)<br>0.27+/- 0.14; 0.3           | <0.001  |
| > 0.5mg/dL increase          | 11 (8.15)<br>1.23 +/- 0.99; 0.80          | 3 (10.71)<br>0.87 +/-0.25; 0.9         | 11 (57.90)<br>2.95 +/- 2.93; 1.7         | <0.001  |
| ≤ 30% increase               | 114 (84.45)<br>14.15%+/- 6.85%;<br>11.11% | 25 (89.29)<br>10.22%+/- 4.6%;<br>9.25% | 12 (63.15)<br>12.82%+/-6.64%;<br>12.99%  | 0.01    |
| > 30% increase               | 21 (15.55)<br>89.25%+/-81.07%;<br>46.67%  | 3 (10.71)<br>45.83% +/- 8.78%;<br>45%  | 7 (36.85)<br>100.32%+/-69.10%;<br>88.23% | <0.001  |

\*Values are n (%) and mean+/- SD; median



1  
2  
3  
4  
5  
6  
7  
8  
9  
10  
11  
12  
13  
14  
15  
16  
17  
18  
19  
20  
21  
22  
23  
24  
25  
26  
27  
28  
29  
30  
31  
32  
33  
34  
35  
36  
37  
38  
39  
40  
41  
42  
43  
44  
45  
46  
47  
48  
49

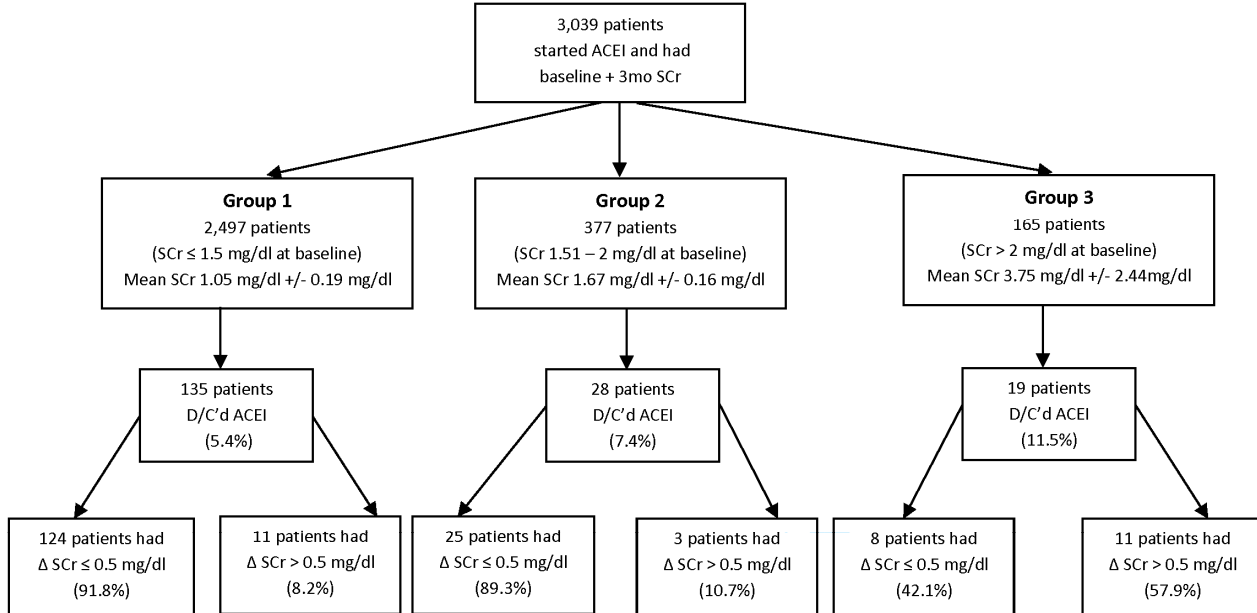

Figure1. Profile of patients included in analysis.  
 ACEI: Angiotensin-Converting Enzyme Inhibitors; ADR: Adverse Drug Reaction; DIC'd: discontinued; SCr: Serum Creatinine.

Figure 2: Changes in Serum Creatinine at 1 Year for Patients with SCr>2 mg/dL

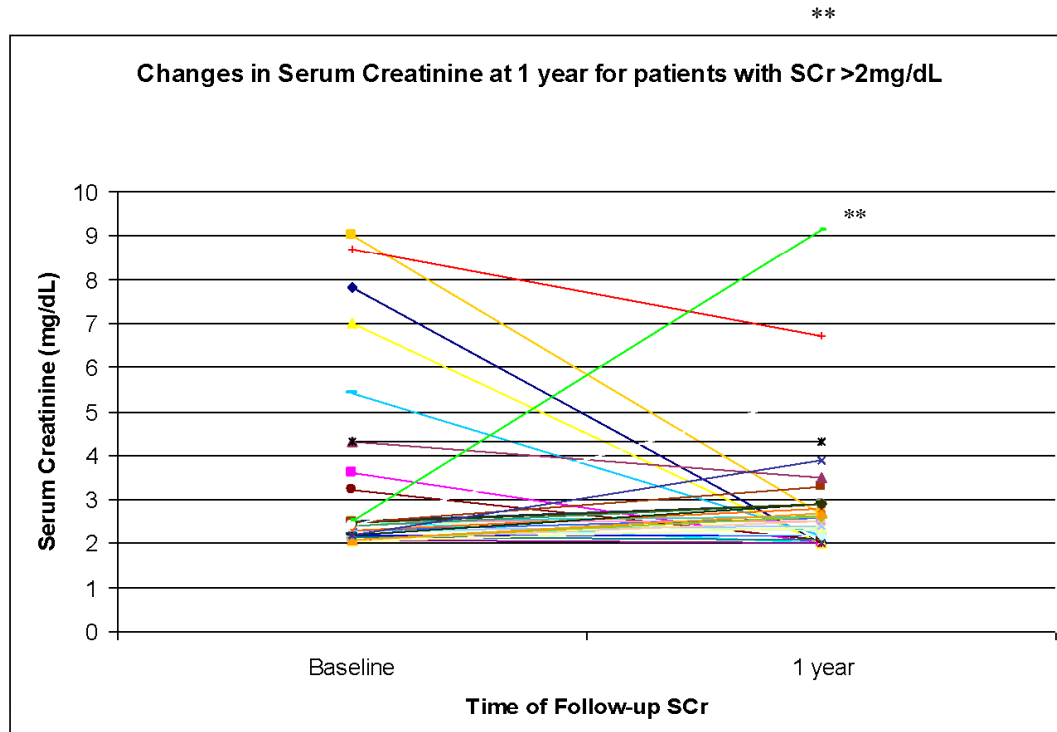

\*The mean change in serum creatinine was  $-0.24 \pm 0.56$  mg/dL with a median of  $-0.01$ mg/dL. Excluding outlier (\*\*), resulted in a mean in change serum creatinine of  $-0.44 \pm 1.96$  mg/dL with a median of  $-0.01$ mg/dL.

N= 35

1  
2  
3  
4  
5  
6  
7  
8  
9  
10  
11  
12  
13  
14  
15  
16  
17  
18  
19  
20  
21  
22  
23  
24  
25  
26  
27  
28  
29  
30  
31  
32  
33  
34  
35  
36  
37  
38  
39  
40  
41  
42  
43  
44  
45  
46  
47  
48  
49  
50  
51  
52  
53  
54  
55  
56  
57  
58  
59  
60

**Figure Legends**

**Figure 1:**

**Title: Profile of patients included in the analysis.**

**Figure 2:**

**Title: Change in Serum Creatinine at 1 Year for Patients with S<sub>Cr</sub>>2mg/dL**

**x-axis: Time of Follow-up S<sub>Cr</sub>**

**y-axis: Serum Creatinine (,g/dL)**

For peer review only

## References

1. Hung SA, Abraham WT, Chin MH, et al. ACC/AHA 2005 guideline update for the diagnosis and management of chronic heart failure in the adult: a report of the American College of Cardiology/American Heart Association Task Force on Practice Guidelines (Writing Committee to Update the 2001 Guidelines for the Evaluation and Management of Heart Failure). American College of Cardiology Web Site. Available at: <http://www.acc.org/clinical/guidelines/failure//index.pdf>.
2. Antman EM, Anbe DT, Armstrong PW, et al. ACC/AHA Guidelines for the management of patients with ST-elevation myocardial infarction- Executive Summary. J Am Coll Cardiol 2004;44:671-7.
3. American Diabetes Association. Standards of Medical Care in Diabetes-2014. Diabetes Care 2014;37;S5-S13.
4. Marre M, Leblanc H, Suarez L, et al. Converting enzyme inhibition and kidney function in normotensive diabetic patients with persistent microalbuminuria. BMJ 1987;294:1448-52.
5. Chobanian AV, Bakris GL, Black HR, et al. The Seventh Report of the Joint National Committee on Prevention, Detection, Evaluation, and Treatment of High Blood Pressure. JAMA 2003;289:2560-72.
6. Matsuda H, Hayashi K, Arakawa K, et al. Zonal heterogeneity in action of angiotensin-converting enzyme inhibitor on renal microcirculation. J Am Soc Nephrol 1999;10:2272-82.
7. Ahmed A, Kiefe C, Allman R, et al. Survival benefits of angiotensin converting enzyme inhibitors in older heart failure patients with perceived contraindications. J Amer Ger Soc 2002;50:1659-66.

- 1  
2  
3 8. The CONSENSUS Trial Study Group. Effects of enalapril on mortality in severe congestive  
4 heart failure: results of the Cooperative North Scandinavian Enalapril Survival Study  
5 (CONSENSUS). *N Engl J Med* 1986;316:1429-35.  
6  
7
- 8 9. The SOLVD Investigators. Effects of enalapril on mortality and the development of heart  
9 failure in asymptomatic patients with reduced left ventricular ejection fractions. *N Engl J*  
10 *Med* 1987;325:293-302.  
11  
12
- 13 10. Ghali JK, Giles T, Gonzales M, et al. Patterns of physician use of angiotensin converting  
14 enzyme inhibitors in the inpatient treatment of congestive heart failure. *J. La State Med Soc*  
15 1997;149:474-84.  
16  
17
- 18 11. Hou FF, Zhang X, Zhang GH, et al. Efficacy and safety of benazepril for advanced chronic  
19 renal insufficiency. *N Engl J Med* 2006;354:131-40.  
20  
21
- 22 12. Schoolwerth AC, Sica D, Ballerma B, Wilcox C. Renal considerations in angiotensin  
23 converting enzyme inhibitor therapy: A statement of healthcare professional from the  
24 Council on the Kidney in Cardiovascular Disease and the Council of High Blood Pressure  
25 Research of the American Heart Association. *Circulation* 2001;104:1985-91.  
26  
27
- 28 13. Bakris GL, Weir MR. Angiotensin- converting enzyme inhibitor associated elevations in  
29 SCr. Is this a cause for concern? *Arch Intern Med* 2000;168:685-88.  
30  
31
- 32 14. Knight E, Glynn R, McIntyre K, et al. Predictors of decreased renal function in patients with  
33 heart failure during angiotensin-converting enzyme inhibitor therapy: results from the Studies  
34 of Left Ventricular Dysfunction (SOLVD). *Amer Heart J* 1999;138:849-55.  
35  
36
- 37 15. Hirsch S, Hirsch J, Udayan B, Rovin BH. Tolerating increases in serum creatinine following  
38 aggressive treatment of chronic kidney disease, hypertension and proteinuria: pre-renal  
39 success. *Am J Nephrol* 2012;36:430-7.  
40  
41  
42  
43  
44  
45  
46  
47  
48  
49  
50  
51  
52  
53  
54  
55  
56  
57  
58  
59  
60

- 1  
2  
3 16. Ruggenenti P, Remuzzi G. Dealing with renin-angiotensin inhibitors, don't mind serum  
4  
5 creatinine. *Am J Nephrol* 2012;36:427-9.  
6  
7
- 8 17. Ahmed A. Use of angiotensin-converting enzyme inhibitors in patients with heart failure and  
9  
10 renal insufficiency: How concerned should we be by the rise in SCr. *J Amer Ger Soc*  
11  
12 2002;50:1297-1300.  
13  
14
- 15 18. Raebel M, Lyons E, Andrade S, et al. Laboratory monitoring of drugs at initiation of therapy  
16  
17 in ambulatory care. *J Gen Intern Med* 2005;20:1120-26.  
18  
19
- 20 19. Gurwitz JH, Field TS, Harrold LR, et al. Incidence and preventability of adverse drug events  
21  
22 among older persons in the ambulatory setting. *JAMA* 2003;289:1107-16.  
23  
24
- 25 20. Raebel M, Lyons E, Chester E, et al. Randomized trial to improve safety monitoring of  
26  
27 ongoing drug therapy in ambulatory patients. *Pharmacotherapy* 2006;5:626-29.  
28  
29
- 30 21. Hess D. Retrospective studies and chart reviews. *Respir Care* Oct 2004;49:1171-74.  
31  
32  
33  
34  
35  
36  
37  
38  
39  
40  
41  
42  
43  
44  
45  
46  
47  
48  
49  
50  
51  
52  
53  
54  
55  
56  
57  
58  
59  
60

## Rates and Predictors of Angiotensin-Converting Enzyme Inhibitor Discontinuation

### Subsequent to Elevated Serum Creatinine: A **Retrospective** Cohort Study

Cynthia A. Jackevicius, BScPhm, MSc, PharmD<sup>1, 2, 3, 4, 5</sup>, Joyce Wong, PharmD<sup>1</sup>, Irina Aroustamian, PharmD<sup>1</sup>, Manyee Gee, PhD<sup>2</sup>, Freny Vaghaiwalla Mody, MD FACC<sup>2, 6</sup>

Department of Pharmacy Practice and Administration, Western University of Health Sciences<sup>1</sup>, Department of Medicine & Pharmacy, Veteran Affairs Greater Los Angeles Healthcare System<sup>2</sup>, Institute of Health Policy, Management and Evaluation, Faculty of Medicine, University of Toronto<sup>3</sup>, Institute for Clinical Evaluative Sciences<sup>4</sup>, [Department of Pharmacy, University Health Network<sup>5</sup>](#), [Division of Cardiology, Department of Medicine, David Geffen School of Medicine, University of California Los Angeles<sup>6</sup>](#)

Corresponding author:

Freny Vaghaiwalla Mody, MD

VA Greater Los Angeles Healthcare System & David Geffen School of Medicine at UCLA

Phone: 310-268-3839 Fax: 310-268-4391 Email: [freny.mody@va.gov](mailto:freny.mody@va.gov)

Running Title: Predictors of ACEI Discontinuation

Word count: [27142602](#)

**Key Words:** ACE inhibitors, serum creatinine, renal dysfunction, drug utilization, chronic kidney disease

## Abstract

Background/Objectives: Angiotensin-converting enzyme inhibitors (ACEI) are underutilized despite cardiovascular benefits, in part due to concerns of known transient elevations in serum creatinine (SCr) after initiation. Our objectives were to~~We~~ evaluate rates and predictors of ACEI discontinuation after SCr elevation post-ACEI initiation since limited data are available that examine this issue.

Setting: Primary and tertiary Veterans healthcare system in Los Angeles, California

Participants: 3,039 outpatients initiating an ACEI with a SCr measured within 6 months prior to and approximately 3 months after initiating an ACEI. Patients were divided into 3 groups (SCr<1.5,1.5-2.0 and>2.0).

Primary and Secondary Outcome Measures: Rates and factors associated with ACEI discontinuation subsequent to SCr elevation after ACEI initiation and for patients with baseline SCr>2mg/dL, the change in SCr associated with chronic use. Predictors were identified using multivariate logistic regression modeling.

~~Methods: In this retrospective, cohort study, we estimated the rates and factors associated with ACEI discontinuation subsequent to SCr elevation after ACEI initiation, and for patients with baseline SCr>2mg/dL, the change in SCr associated with chronic use. All patients initiating ACEI from January 1/02 to December 31/04 with 3 months SCr were included, and divided into 3 groups (SCr<1.5,1.5-2.0 and>2.0). Predictors were identified using multivariate logistic regression modeling.~~

Results: At 3 months follow-up, for those with an increase in SCr, the mean increase ~~in SCr~~ post-ACEI initiation was 26%, ranging from -0.01 mg/dL to 0.42 mg/dL varying according to level of baseline renal function. ACEI discontinuation was higher~~rst~~ in patients with elevated baseline SCr



1  
2  
3 | ([19/165](#), 11.5%) compared with those with  $SCr < 1.5$  ([135/2,497](#), 5.4%), and those with  $SCr$  1.5-  
4 | 2.0 ([28/377](#), 7.4%). ~~Male Ppatients~~ ~~that were male~~, ~~or~~ and those with heart failure were less  
5 |  
6 | likely to discontinue ACEI after an elevation of serum creatinine post-ACEI initiation, while  
7 |  
8 | those taking NSAIDs, diuretics and beta-blockers were more likely to discontinue ACEI.  
9 |

10 |  
11 | Conclusions: Serum creatinine increases <30% on average within 3 months of ACEI initiation,  
12 |  
13 | with subsequent discontinuation rates varying by baseline  $SCr$ . Elevation in  $SCr$  was not  
14 |  
15 | associated with ACEI discontinuation rates. In patients with  $SCr > 2$  mg/dL at baseline, ~~D~~despite  
16 |  
17 | an acute increase in  $SCr$  after ACEI initiation, chronic ACEI use was associated with a decrease  
18 |  
19 | in  $SCr$  in most patients ~~with  $SCr > 2$  mg/dL~~.  
20 |  
21 |  
22 |  
23 |  
24 |  
25 |  
26 |  
27 |  
28 |  
29 |  
30 |  
31 |  
32 |  
33 |  
34 |  
35 |  
36 |  
37 |  
38 |  
39 |  
40 |  
41 |  
42 |  
43 |  
44 |  
45 |  
46 |  
47 |  
48 |  
49 |  
50 |  
51 |  
52 |  
53 |  
54 |  
55 |  
56 |  
57 |  
58 |  
59 |  
60 |

## Article Summary

### Strengths and Limitations of this Study

- To date, no studies have evaluated both the acute elevation in serum creatinine post-ACE inhibitor initiation and the predictors of subsequent discontinuation following an elevated serum creatinine.
- This study confirmed the mean increase in serum creatinine after ACE inhibitor initiation is 26%, varying with baseline renal function.
- Factors other than elevation in serum creatinine were associated with ACE inhibitor discontinuation, including, female sex, absence of heart failure, and use of NSAIDs, diuretics or beta-blockers.

## Introduction

Current guidelines recommend angiotensin-converting enzyme inhibitors (ACEIs) as the standard of therapy for post-myocardial infarction, chronic heart failure (CHF), and diabetes due to the substantial endothelial, cardiovascular and renal protection.<sup>1-4</sup> Furthermore, ACEIs have also been shown to be a beneficial therapy for hypertension.<sup>5</sup> The renal protective mechanism of ACEIs vary, ranging from improving vascular endothelium function to vasodilatation effects.<sup>6</sup> Despite evidence from numerous trials showing the benefits of improved morbidity and mortality by ACEIs, these drugs are still underutilized.<sup>1-4, 7-10</sup> Clinicians are reluctant to start and continue with adequate dosing of ACEIs primarily due to concerns of elevations in serum creatinine (SCr), particularly in patients with CKD despite evidence that this group of patients benefits from ACEI.<sup>10,11</sup> The most probable cause of an acute elevation in SCr post-ACEI initiation is the decrease in vasoconstriction in the efferent arterioles resulting in pressure reduction in the glomerular apparatus and decreased glomerular filtration rate (GFR).<sup>6</sup> However, homeostasis of hemodynamics occurs with long-term use with gradual return and improvement in GFR.<sup>7</sup> Even with concerns of an acute rise in SCr, ACEIs provide long-term benefits with some data suggesting an improvement in renal function with decrease in SCr with long-term use.<sup>7,11,12</sup> In heart failure (HF) patients, RCTs estimate that between 2.4% and 16% of patients experience an acute increase in SCr of > 0.5mg/dL after ACEI initiation, with improvement with chronic use.<sup>8-9</sup> In a practice-based setting, Bakris and colleagues demonstrated a mean increase in SCr of 30% in a hypertensive population using ACEIs with the increase stabilizing within 2 months after ACEI initiation. This rise in SCr is [proportional to the baseline SCr, such that a 30% increase at a SCr of 2 would be 2.6 while at a SCr of 1, it would be only 1.3, it is](#) reversible upon discontinuation, and [it](#) is less likely to occur beyond 4 weeks of initiation.<sup>13,14</sup> HF patients suffer

1  
2  
3 a more pronounced increase in SCr with ACEIs due to a reduction of blood flow to the kidneys  
4  
5 from reduced cardiac output, diuretic use, and vasodilation effect. Although the acute increase in  
6  
7 SCr seen in HF patients ranges from 75% to 200% from baseline after ACEI initiation, this  
8  
9 elevation was suggested as being acceptable since ACEIs have proven benefits in decreasing  
10  
11 mortality in this population.<sup>8,15</sup>  
12  
13

14  
15 The frequency of the discontinuation rate of ACEI and the determinant factors associated  
16  
17 with discontinuation in the real world setting has not been fully characterized. The  
18  
19 CONSENSUS II HF trial reported a discontinuation rate of 4.6% with enalapril subsequent to the  
20  
21 rise of SCr, while a meta-analysis of randomized controlled trials of HF patients found an ACEI  
22  
23 discontinuation rate of 13.8%, of which only 0.4% was attributed to an increase in SCr.<sup>7,16</sup>  
24  
25  
26

27 To date, no studies have evaluated both the acute elevation in SCr post-ACEI initiation  
28  
29 and the predictors of subsequent discontinuation following an elevated SCr. Assessment of these  
30  
31 patterns may provide insight into clinician decision making in a real world setting. The objective  
32  
33 of our study was to assess the rates and predictors of ACEI discontinuation following an increase  
34  
35 in SCr post-ACEI initiation, each according to baseline renal function.  
36  
37  
38  
39  
40  
41  
42  
43  
44  
45  
46  
47  
48  
49  
50  
51  
52  
53  
54  
55  
56  
57  
58  
59  
60

## Methods

We conducted a retrospective observational cohort study of all outpatients initiating an ACEI between 2002 and 2004 at the Veterans Affairs Greater Los Angeles Healthcare System (VAGLAHS). The Veterans Health Information System and Technology Architecture (VISTA) database was used to gather patient information (demographics, medication use, allergies, comorbidities, and lab results).

Initiation of ACEI was defined as the dispensing of an outpatient prescription for an ACEI with no previous record of ACEI use in the past 6 months. The following ACEI information was collected: initiation date, discontinuation date, adverse drug reactions (ADR), dosage, dosing frequency and the total daily dose. To determine the prevalence of a change in SCr, SCr was recorded at baseline (within 6 months of ACEI initiation) and 3-months (10-14 weeks) post-initiation. If SCr data was not available between 10-14 weeks (3 months), the data value of the most proximal assay was recorded. A 0.5mg/dL increase and 30% increase in SCr was considered to be clinically important since several studies have used this as a reference point to define a decrease in renal function.<sup>5-6,14</sup> Discontinuation of ACEI was defined as no refills within 90 days after the last filled prescription which allowed a lenient grace period for patients obtaining late refills. Patients were stratified into three baseline SCr groups (group 1: SCr <1.5mg/dL; group 2: 1.6-2.0mg/dL; and group 3: >2.0mg/dL) for analysis. We assessed above and below 0.5mg/dL and 30% to determine the threshold at which discontinuation occurred and to analyze possible differences in threshold by group. For those patients with a baseline SCr >2mg/dL and continued on an ACEI, SCr was recorded at 1-year to detect any changes post-initiation. Comorbidities (defined by ICD-9 codes: 425-cardiomyopathy, 428-congestive heart failure, 250-diabetes, 410-414-coronary artery disease, 274-gout, 401-hypertension) and

1  
2  
3 concurrent use of NSAIDs, diuretics, and beta-blockers were documented to determine potential  
4 factors associated with an increase in SCr and the discontinuation of ACEIs. Concomitant  
5 medication use was defined as having an active prescription within 1 month of the index date of  
6 ACEI prescription through the time of discontinuation.  
7  
8  
9  
10  
11

12 The endpoints of this study were: the proportion of patients with a significant increase in  
13 SCr post-ACEI initiation at 3-months follow-up defined as  $>0.5\text{mg/dL}$  or  $>30\%$  of baseline by  
14 group; the proportion of patients with ACEI discontinued following a rise in SCr by group; the  
15 threshold of increase in SCr associated with ACEI discontinuation, stratified by baseline SCr  
16 groups; factors (patient characteristics, comorbidities, and concurrent medications) that may be  
17 associated with discontinuation of ACEIs; and the change in SCr in patients with baseline SCr  
18  $>2\text{mg/dL}$  and continued on ACEIs for 1 year.  
19  
20  
21  
22  
23  
24  
25  
26  
27  
28

29 Continuous baseline characteristics were expressed as the mean  $\pm$ SD or median; and  
30 categorical baseline characteristics were expressed as a proportion. Chi square test was used to  
31 compare the discontinuation rate after detecting a rise in SCr post-ACEI use between groups and  
32 to compare the threshold of increase in SCr prior to discontinuation between groups. A multiple  
33 logistic regression model was constructed to identify the factors associated with SCr elevation  
34 subsequent to ACEI initiation and ACEI discontinuation. The univariate model included patient  
35 characteristics (i.e., age, gender), comorbidities (i.e., diabetes, hypertension, coronary artery  
36 disease, chronic heart failure, systolic blood pressure (SBP) $<100\text{mmHg}$ , gout), concomitant  
37 NSAID use, diuretic use (i.e. thiazide, loop,  $\text{K}^+$  sparing), beta-blocker use, and significant SCr  
38 elevation defined as  $>0.5\text{mg/dL}$  or  $>30\%$  of baseline. Variables with  $p < 0.2$  from the univariate  
39 model were placed in a multiple logistic regression model using stepwise selection. Odds ratio  
40 with 95% confidence interval were estimated from the regression model. A p-value  $< 0.05$  was  
41  
42  
43  
44  
45  
46  
47  
48  
49  
50  
51  
52  
53  
54  
55  
56  
57  
58  
59  
60

1  
2  
3 considered statistically significant. All results were analyzed using SAS [Version 8.2, SAS  
4  
5  
6 Institute, Cary, NC]. This was a non-funded study approved by the institutional review board at  
7  
8 VAGLAHS and Western University of Health Sciences.  
9  
10  
11  
12  
13  
14  
15  
16  
17  
18  
19  
20  
21  
22  
23  
24  
25  
26  
27  
28  
29  
30  
31  
32  
33  
34  
35  
36  
37  
38  
39  
40  
41  
42  
43  
44  
45  
46  
47  
48  
49  
50  
51  
52  
53  
54  
55  
56  
57  
58  
59  
60

For peer review only

## Results

At a total of 3,039 patients were initiated on an ACEI between January 2002 and December 2004 and had a SCr measured within 6 months prior to and 3 months after initiating an ACEI. (Figure 1) The average age was 65.0 years and 97.6% were male with a baseline SCr of 1.28 $\pm$ 0.86 mg/dL. Patients were stratified into three groups based on baseline SCr: Group 1 consisted of 2,497 patients with a SCr of <1.5 mg/dL (mean of 1.05 $\pm$  0.19); group 2 had 377 patients with a SCr of 1.5-2.0 mg/dL (mean of 1.67  $\pm$ 0.16); and group 3 had 165 patients with a SCr of >2.0 mg/dL (mean of 3.75 $\pm$ 2.44). (Figure 1) Hypertension (44.2%) and diabetes (28.5%) were the most frequently documented comorbidities, and the most common concomitant medications were diuretics and beta-blockers. (Table 1)

On average, patients had a follow-up SCr available at a median of 3.8 months post-ACEI initiation. The mean changes in SCr at 3 months follow-up [most proximal to the 3-month interval](#) were 0.05  $\pm$ 0.30 mg/dL, -0.01 $\pm$ 0.31 mg/dL, and 0.42  $\pm$ 2.20 mg/dL respectively, by group. ([p>0.05 vs. baseline for all groups](#)). There was no change in median SCr at 3 months follow-up for all three groups. Counting only those patients with an increase in SCr for all 3 groups, [based on an increase from baseline SCr \(n=182\)](#), the average percent increase in SCr prior to ACEI discontinuation was 25.98%  $\pm$ 41.72 with a median of 13.49%.

At 3 months, the discontinuation rate of ACEI with or without concomitant SCr rise of >0.5mg/dL was highest in group 3 (11.5%), followed by group 2 (7.4%) and group 1 (5.4%) ( $p<0.001$ ) (Figure 1). In the multiple logistic regression model the variables significantly associated with a greater likelihood of ACEI discontinuation were the use of NSAIDs, diuretics, and beta-blockers. (Table 2) Of note, a significant increase in SCr (defined as >0.5mg/dl or >30 %) was not associated with ACEI discontinuation. ( $p=0.498$  in the univariate model). A history of CHF,



1  
2  
3 SBP of <100mmHg at baseline and male sex were significantly associated with a reduced  
4  
5 likelihood of ACEI discontinuation.  
6  
7

8 Changes in SCr were further evaluated based on absolute and percent change. Table 3  
9  
10 depicts the change in SCr ~~subsequent to~~prior to ACEI discontinuation, at the threshold of  
11  
12 0.5mg/dL and 30% increase in SCr (in 182 patients [5.9%] of all patients initiated on ACEI who  
13  
14 had an increase in SCr). Group 3 had the highest mean increase in SCr as both absolute and  
15  
16 percent change. A majority of the patients who experienced an increase in SCr had a change less  
17  
18 than both 30% increase and 0.5mg/dL increase prior to discontinuation. Thus, most ACEI  
19  
20 discontinuation did not occur following a clinically significant increase in SCr (>30% or  
21  
22 >0.5mg/dL above baseline).  
23  
24  
25  
26

27 Of the 165 patients with a baseline SCr >2.0mg/dL (mean 3.75+/-2.44), only 50 patients  
28  
29 (30.3%) were continued on an ACEI at 1 year. ~~Of the 405 patients who discontinued ACEI, 165-~~  
30  
31 ~~patients discontinued within 90 days of a SCr result.~~ A total of 69 of the 165 (41.8%) patients  
32  
33 experienced a decrease in SCr prior to discontinuation (average decrease was 1.04 +/- 1.77) and  
34  
35 76 (46.0%) of the patients experienced an increase (average increase was 1.86+/-0.87) and 20  
36  
37 (12.1%) patients experienced no change from baseline prior to discontinuation. Of the 50  
38  
39 patients who continued on ACEIs, only 35 patients had a follow-up in SCr at 1 year and their  
40  
41 mean decrease in SCr was -0.24 +/-0.56 with a median decrease of -0.01mg/dL. Of these 35  
42  
43 patients, one (2.86%) had a larger increase in SCr (from 2.5 to 9.1 mg/dL) as compared with the  
44  
45 remaining patients in the group (Figure 2). Excluding this subject as an outlier with a rise in SCr  
46  
47 at 1 year that is unlikely due to ACEI, resulted in a mean decrease in SCr at 1 year in group 3 of -  
48  
49 0.44+/-1.96 with a median of -0.01mg/dL. While the majority (54.28%) of patients in Group 3  
50  
51 experienced a clinically significant absolute (>0.5 mg/dL) increase in SCr of 0.98+/-1.58  
52  
53  
54  
55  
56  
57  
58  
59  
60

1  
2  
3 compared with a baseline of 3.75+/-2.44, the 27% relative increase was not above the generally  
4  
5 accepted threshold of >30%. Forty percent of this group experienced a decrease in SCr of  
6  
7  
8 1.19+/-2.26 compared to baseline 3.75+/-2.44 and 5.7% had no change in SCr at 1-year follow-  
9  
10 up. The average magnitude of decrease in SCr was greater than the average magnitude of  
11  
12 increase in SCr with long term use of ACEI (1.19+/-2.26 mg/dL decrease versus 0.98 +/-  
13  
14 1.58mg/dL increase, p<0.001) in patients with SCr>2 mg/dL.  
15  
16  
17  
18  
19  
20  
21  
22  
23  
24  
25  
26  
27  
28  
29  
30  
31  
32  
33  
34  
35  
36  
37  
38  
39  
40  
41  
42  
43  
44  
45  
46  
47  
48  
49  
50  
51  
52  
53  
54  
55  
56  
57  
58  
59  
60

## Discussion

In our study, which had a large hypertensive population, we showed an increase in SCr of approximately 26% post-ACEI initiation [for those with an increase in SCr](#). Previous studies have documented similar acute increases in SCr of 30% in hypertensive patients and up to 200% in HF patients.<sup>13,14</sup> It has been suggested that ACEI discontinuation be considered if an increase in SCr exceeds 30% with ACEI use since renal function may be compromised beyond this increase and the benefits of ACEI may not outweigh the risks.<sup>13</sup> Our study showed that the majority of ACEI discontinuation occurred with an increase of less than 30% in SCr, thus suggesting that the threshold of concern for renal deterioration is lower in clinical practice or other factors may be more likely associated with discontinuation.

According to previous trials, a change in SCr of >0.5mg/dL may also be considered clinically significant.<sup>8,9</sup> The majority of the patients that discontinued ACEI in our study experienced a <0.5mg/dL change in SCr. Our study further suggested that on average, SCr was not greatly affected by ACEI since all three groups had no change in median SCr over 3 months. Thus, the discontinuation of ACEI in our population was most likely attributed to drug intolerances, such as, cough, other comorbidities, and concomitant medications, rather than the change in SCr. Only 6% of patients in the lower baseline SCr group suffered from documented cough or nausea leading to the discontinuation of ACEI. The adjusted regression analysis demonstrated that concomitant use of NSAIDs, diuretics, and beta-blockers were factors associated with a higher likelihood of ACEI discontinuation. This may be anticipated since both NSAIDs and diuretics have been documented to decrease renal function and exacerbate SCr elevations when used concomitantly with ACEI.<sup>12</sup> However, this may have led to the discontinuation of ACEI at a lower threshold of SCr increase. If discontinuation of ACEI was

1  
2  
3 indeed at a lower threshold than that traditionally accepted (SCr rise >0.5 or 30%), improved  
4 awareness for clinicians of the short duration of an acute rise in SCr when initiating ACEI, and  
5  
6 dose reduction or reassessment of need for concomitant NSAIDs or diuretics may be beneficial  
7  
8 strategies. This may confer better clinical outcomes for patients, particularly diabetic patients  
9  
10 who would benefit from the nephroprotective actions of ACEI. Contrary to previous findings,  
11  
12 beta-blockers were associated with a higher likelihood of discontinuation with concomitant use  
13  
14 of ACEI in our study rather than exerting a renoprotective effect with ACEI use.<sup>14</sup> Male sex,  
15  
16 CHF history, and SBP of <100mmHg were also associated with a lower chance of ACEI  
17  
18 discontinuation. We postulated that patients with CHF and SBP <100mmHg were more likely to  
19  
20 be maintained on an ACEI since HF studies have documented benefits of ACEI in decreasing  
21  
22 morbidity and mortality.<sup>1,7-8</sup>  
23  
24  
25  
26  
27  
28

29 In patients with baseline SCr >2 mg/dL, our study showed that SCr can increase,  
30  
31 decrease, or remain unchanged with long term ACEI use. Even though the majority of these  
32  
33 patients experienced an acute increase in SCr, our results support ACEI use in renal impaired  
34  
35 patients since the median change in SCr decreased and in the long term, the magnitude of  
36  
37 decrease was much more impressive than the magnitude of increase. Our study is consistent  
38  
39 with the prospective findings by Hou et al [and retrospective findings by Hirsch et al](#), [who both](#)  
40  
41 ~~that~~ found [that](#) despite the acute increase in SCr, long term improvement in SCr occurs in many  
42  
43 patients with impaired renal function at baseline.<sup>11,15,16</sup> The use of ACEI is warranted in this  
44  
45 group of patients, along with close monitoring of renal function and electrolytes since benefits  
46  
47 were documented in this study as well as in previous studies.<sup>11-12,17-20</sup>  
48  
49  
50  
51  
52

53 Limitations of our study include its retrospective study design with potential for  
54  
55 confounding.<sup>201</sup> [Given our VA population, the vast majority of patients were male, limiting](#)  
56  
57  
58  
59  
60

1  
2  
3 generalizability to female patients. In addition, the electronic medical records may not be  
4 complete and accurate as is a limitation of any study relying on retrospective documentation  
5  
6 medical chart extraction. Finally, the sample size of patients with SCr >2 mg/dL was small both  
7  
8 pre- and post-follow-up of SCr. However, the large population-based sample increases the  
9  
10 generalizability of the findings.  
11  
12

13  
14  
15 Many clinicians may be reluctant to prescribe ACEIs to all eligible patients due to  
16 concerns of an elevation in SCr. Based on this real world study, the magnitude of increase in  
17  
18 SCr post-ACEI initiation was slightly lower than the commonly used threshold of 30%. We  
19  
20 found that, instead of a clinically meaningful rise in SCr, ACEI discontinuation may be more  
21  
22 likely associated with either comorbidities, and concomitant medications that may increase SCr,  
23  
24 or a low threshold of concern for SCr elevations ~~may be more likely associated with ACEI~~  
25  
26 ~~discontinuation rather than a clinically meaningful rise in SCr.~~ Identification of other factors that  
27  
28 may increase SCr, such as, NSAID use, diuretic use, and volume depletion should be considered  
29  
30 before an ACEI is discontinued. The importance of monitoring should be emphasized to detect  
31  
32 any drastic increase in SCr >30% and to manage potential adverse drug reactions. ~~Identification~~  
33  
34 ~~of other factors that may increase SCr, such as, NSAID use, diuretic use, and volume depletion~~  
35  
36 ~~should be considered before an ACEI is discontinued.~~ Education may be required to change  
37  
38 practice patterns in patients with impaired baseline renal function in order to confer the clinical  
39  
40 benefit of chronic ACEI nephroprotection.  
41  
42  
43  
44  
45  
46  
47  
48  
49  
50  
51  
52  
53  
54  
55  
56  
57  
58  
59  
60

**Author Contributions:**

Jackevicius: Concept/design, data interpretation, critical revision of article, approval of article, statistics

Wong: Design, data analysis/interpretation, drafting article, approval of article, statistics

Aroustamian: Data analysis, critical revision of article, approval of article, statistics

Gee: Data collection/interpretation, critical revision of article, approval of article

Mody: Concept/design, data interpretation, critical revision of article, approval of article

**Funding:** None.

**Data Sharing:** No additional data available.

**Acknowledgments:** None.

**Table 1. Baseline characteristics of cohort (n= 3,039)**

| Characteristic                                       | Value*                                      |
|------------------------------------------------------|---------------------------------------------|
| Age (years, mean+/-SD, median)                       | 65 +/-12, 65                                |
| Gender (n, %)                                        |                                             |
| Male                                                 | 2966 97.6%                                  |
| Ethnicity (n, %)                                     |                                             |
| African American                                     | 414 13.6%                                   |
| Caucasian                                            | 670 22.0%                                   |
| Hispanic                                             | 44 1.45%                                    |
| Other                                                | 341 11.2%                                   |
| Not documented                                       | 1570 51.7%                                  |
| Baseline serum creatinine (mg/dL, mean+/-SD, median) | Mean+/-SD, Median                           |
| Overall (n=3,039)                                    | Overall: Overall: 1.28 +/- 0.86, 1.10       |
| Group 1 : < 1.5mg/dL (n=2,497)                       | Group 1 : < 1.5mg/dL = 1.05 +/-0.19, 1.03   |
| Group 2 : 1.5-2.0 mg/dL (n=377)                      | Group 2 : 1.5-2.0 mg/dL = 1.67 +/-0.16, 1.6 |
| Group 3 : > 2 mg/dL (n=165)                          | Group 3 : > 2 mg/dL = 3.75+/-2.44, 2.7      |

---

| Co-morbidities (n, %)   | n    | %      |
|-------------------------|------|--------|
| Diabetes Mellitus       | 866  | 28.5 % |
| Hypertension            | 1343 | 44.2 % |
| Chronic Heart Failure   | 177  | 5.8 %  |
| Coronary Artery Disease | 445  | 14.6 % |
| Gout                    | 69   | 2.3 %  |
| SBP <100 mmHg           | 88   | 2.9 %  |
| Concomitant Use of:     |      |        |
| NSAIDs                  | 1053 | 34.6 % |
| Diuretics (total)       | 1771 | 58.3 % |
| Loops                   | 773  | 25.4 % |
| Thiazides               | 1264 | 41.6 % |
| K- sparing              | 239  | 7.9 %  |
| Beta-blockers           | 1601 | 52.7 % |

---

\*Values are reported as mean +/- SD; median unless otherwise noted



**Table 2. Multivariate odds ratios for discontinuation of angiotensin-converting enzyme inhibitors subsequent to elevation of SCr post-ACEI initiation**

| Co morbidities          | Multivariate<br>Odds Ratio<br>(95% CI) | P value |
|-------------------------|----------------------------------------|---------|
| Age                     | 1.00(1.00-1.00)*                       | 0.452   |
| Gender (Male)           | 0.74 (0.57-0.97)                       | 0.028   |
| Coronary Artery Disease | 0.89 (0.79-1.01)                       | 0.061   |
| Chronic Heart Failure   | 0.79 (0.63-0.99)                       | 0.041   |
| SBP <100mmHg            | 0.55 (0.40-0.76)                       | <0.001  |
| Concomitant use of:     |                                        |         |
| NSAIDs                  | 1.23(1.13-1.34)                        | <0.001  |
| Diuretics               | 1.07( 0.87-1.31)                       | <0.001  |
| Thiazides               | 1.18 (0.98-1.42)                       | 0.084   |
| Loops                   | 0.99 (0.84-1.18)                       | 0.925   |
| Beta-blockers           | 1.17( 1.08-1.27)                       | <0.001  |

\* Values rounded from 0.999( 0.995-1.002)

**Table 3. Distribution in magnitude of elevation of serum creatinine in patients who discontinued angiotensin-converting enzyme inhibitors within 90 days post-initiation**

| Threshold of increase in SCr | Group 1<br>< 1.5mg/dL<br>n=135            | Group 2<br>1.5-2mg/dL<br>n=28          | Group 3<br>> 2mg/dL<br>n=19              | P value |
|------------------------------|-------------------------------------------|----------------------------------------|------------------------------------------|---------|
| ≤ 0.5mg/dL increase          | 124 (91.85)<br>0.17 +/-0.11; 0.10         | 25(89.29)<br>0.18+/- 0.8; 0.17         | 8 (42.10)<br>0.27+/- 0.14; 0.3           | <0.001  |
| > 0.5mg/dL increase          | 11 (8.15)<br>1.23 +/- 0.99; 0.80          | 3 (10.71)<br>0.87 +/-0.25; 0.9         | 11 (57.90)<br>2.95 +/- 2.93; 1.7         | <0.001  |
| ≤ 30% increase               | 114 (84.45)<br>14.15%+/- 6.85%;<br>11.11% | 25 (89.29)<br>10.22%+/- 4.6%;<br>9.25% | 12 (63.15)<br>12.82%+/-6.64%;<br>12.99%  | 0.01    |
| > 30% increase               | 21 (15.55)<br>89.25%+/-81.07%;<br>46.67%  | 3 (10.71)<br>45.83% +/- 8.78%;<br>45%  | 7 (36.85)<br>100.32%+/-69.10%;<br>88.23% | <0.001  |

\*Values are n (%) and mean+/- SD; median

1  
2  
3  
4  
5  
6  
7  
8  
9  
10  
11  
12  
13  
14  
15  
16  
17  
18  
19  
20  
21  
22  
23  
24  
25  
26  
27  
28  
29  
30  
31  
32  
33  
34  
35  
36  
37  
38  
39  
40  
41  
42  
43  
44  
45  
46  
47  
48  
49



Figure 1. Profile of patients included in analysis.  
 ACEI: Angiotensin-Converting Enzyme Inhibitors; ADR: Adverse Drug Reaction; DIC'd: discontinued; SCr: Serum Creatinine.

Figure 2: Changes in Serum Creatinine at 1 Year for Patients with SCr>2 mg/dL

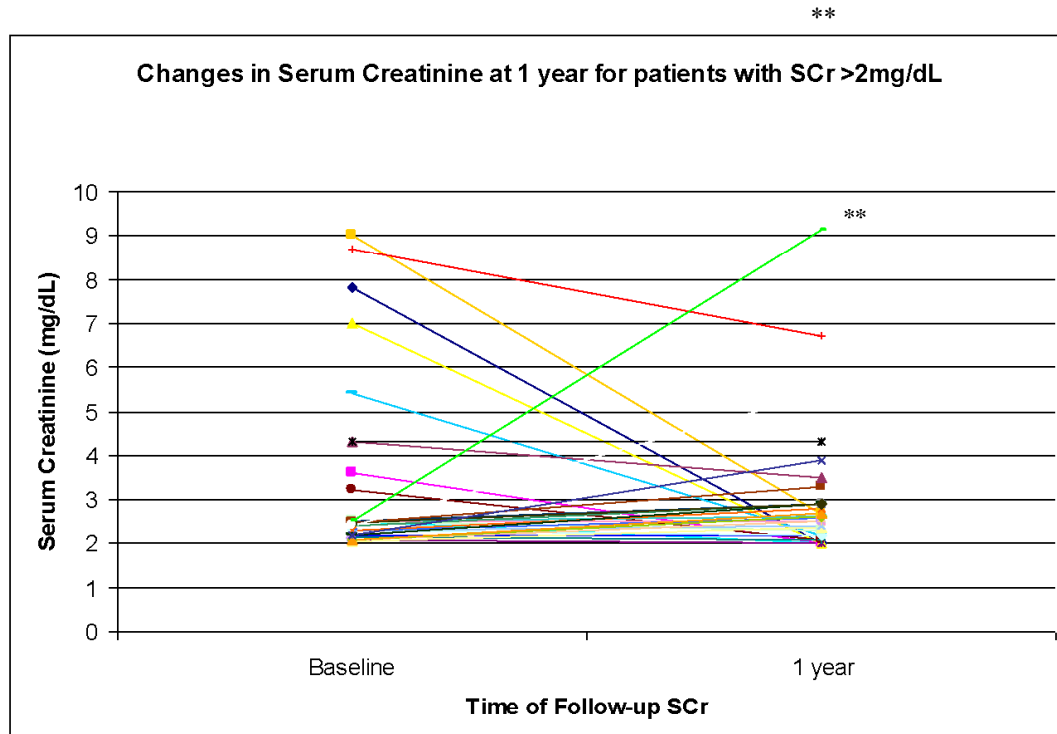

\*The mean change in serum creatinine was  $-0.24 \pm 0.56$  mg/dL with a median of  $-0.01$ mg/dL. Excluding outlier (\*\*), resulted in a mean in change serum creatinine of  $-0.44 \pm 1.96$  mg/dL with a median of  $-0.01$ mg/dL.

N= 35

1  
2  
3  
4  
5  
6  
7  
8  
9  
10  
11  
12  
13  
14  
15  
16  
17  
18  
19  
20  
21  
22  
23  
24  
25  
26  
27  
28  
29  
30  
31  
32  
33  
34  
35  
36  
37  
38  
39  
40  
41  
42  
43  
44  
45  
46  
47  
48  
49  
50  
51  
52  
53  
54  
55  
56  
57  
58  
59  
60

Figure Legends

Figure 1:

Title: Profile of patients included in the analysis.

Figure 2:

Title: Change in Serum Creatinine at 1 Year for Patients with SCr>2mg/dL

x-axis: Time of Follow-up SCr

y-axis: Serum Creatinine (,g/dL)

For peer review only

## References

1. Hung SA, Abraham WT, Chin MH, et al. ACC/AHA 2005 guideline update for the diagnosis and management of chronic heart failure in the adult: a report of the American College of Cardiology/American Heart Association Task Force on Practice Guidelines (Writing Committee to Update the 2001 Guidelines for the Evaluation and Management of Heart Failure). American College of Cardiology Web Site. Available at: <http://www.acc.org/clinical/guidelines/failure//index.pdf>.
2. Antman EM, Anbe DT, Armstrong PW, et al. ACC/AHA Guidelines for the management of patients with ST-elevation myocardial infarction- Executive Summary. J Am Coll Cardiol 2004;44:671-7.
3. American Diabetes Association. Standards of Medical Care in Diabetes-2014. Diabetes Care 2014;37;S5-S13.
4. Marre M, Leblanc H, Suarez L, et al. Converting enzyme inhibition and kidney function in normotensive diabetic patients with persistent microalbuminuria. BMJ 1987;294:1448-52.
5. Chobanian AV, Bakris GL, Black HR, et al. The Seventh Report of the Joint National Committee on Prevention, Detection, Evaluation, and Treatment of High Blood Pressure. JAMA 2003;289:2560-72.
6. Matsuda H, Hayashi K, Arakawa K, et al. Zonal heterogeneity in action of angiotensin-converting enzyme inhibitor on renal microcirculation. J Am Soc Nephrol 1999;10:2272-82.
7. Ahmed A, Kiefe C, Allman R, et al. Survival benefits of angiotensin converting enzyme inhibitors in older heart failure patients with perceived contraindications. J Amer Ger Soc 2002;50:1659-66.

- 1  
2  
3 8. The CONSENSUS Trial Study Group. Effects of enalapril on mortality in severe congestive  
4 heart failure: results of the Cooperative North Scandinavian Enalapril Survival Study  
5 (CONSENSUS). *N Engl J Med* 1986;316:1429-35.  
6  
7
- 8 9. The SOLVD Investigators. Effects of enalapril on mortality and the development of heart  
9 failure in asymptomatic patients with reduced left ventricular ejection fractions. *N Engl J*  
10 *Med* 1987;325:293-302.  
11  
12
- 13 10. Ghali JK, Giles T, Gonzales M, et al. Patterns of physician use of angiotensin converting  
14 enzyme inhibitors in the inpatient treatment of congestive heart failure. *J. La State Med Soc*  
15 1997;149:474-84.  
16  
17
- 18 11. Hou FF, Zhang X, Zhang GH, et al. Efficacy and safety of benazepril for advanced chronic  
19 renal insufficiency. *N Engl J Med* 2006;354:131-40.  
20  
21
- 22 12. Schoolwerth AC, Sica D, Ballerma B, Wilcox C. Renal considerations in angiotensin  
23 converting enzyme inhibitor therapy: A statement of healthcare professional from the  
24 Council on the Kidney in Cardiovascular Disease and the Council of High Blood Pressure  
25 Research of the American Heart Association. *Circulation* 2001;104:1985-91.  
26  
27
- 28 13. Bakris GL, Weir MR. Angiotensin- converting enzyme inhibitor associated elevations in  
29 SCr. Is this a cause for concern? *Arch Intern Med* 2000;168:685-88.  
30  
31
- 32 14. Knight E, Glynn R, McIntyre K, et al. Predictors of decreased renal function in patients with  
33 heart failure during angiotensin-converting enzyme inhibitor therapy: results from the Studies  
34 of Left Ventricular Dysfunction (SOLVD). *Amer Heart J* 1999;138:849-55.  
35  
36
- 37 15. [Hirsch S, Hirsch J, Udayan B, Rovin BH. Tolerating increases in serum creatinine following  
38 aggressive treatment of chronic kidney disease, hypertension and proteinuria: pre-renal  
39 success. \*Am J Nephrol\* 2012;36:430-7.](#)  
40  
41  
42  
43  
44  
45  
46  
47  
48  
49  
50  
51  
52  
53  
54  
55  
56  
57  
58  
59  
60

- 1  
2  
3  
4  
5  
6  
7  
8  
9  
10  
11  
12  
13  
14  
15  
16  
17  
18  
19  
20  
21  
22  
23  
24  
25  
26  
27  
28  
29  
30  
31  
32  
33  
34  
35  
36  
37  
38  
39  
40  
41  
42  
43  
44  
45  
46  
47  
48  
49  
50  
51  
52  
53  
54  
55  
56  
57  
58  
59  
60
16. [Ruggenti P, Remuzzi G. Dealing with renin-angiotensin inhibitors, don't mind serum creatinine. Am J Nephrol 2012;36:427-9.](#)
- ~~15.~~17. Ahmed A. Use of angiotensin-converting enzyme inhibitors in patients with heart failure and renal insufficiency: How concerned should we be by the rise in SCr. J Amer Ger Soc 2002;50:1297-1300.
- ~~16.~~ Agusti A, Bonet S, Arnau J, et al. ~~Adverse effects of ACE inhibitors in patients with chronic heart failure and/or ventricular dysfunction. Drug Safety 2003;26:895-908.~~
- ~~17.~~18. Raebel M, Lyons E, Andrade S, et al. Laboratory monitoring of drugs at initiation of therapy in ambulatory care. J Gen Intern Med 2005;20:1120-26.
- ~~18.~~19. Gurwitz JH, Field TS, Harrold LR, et al. Incidence and preventability of adverse drug events among older persons in the ambulatory setting. JAMA 2003;289:1107-16.
- ~~19.~~20. Raebel M, Lyons E, Chester E, et al. Randomized trial to improve safety monitoring of ongoing drug therapy in ambulatory patients. Pharmacotherapy 2006;5:626-29.
- ~~20.~~21. Hess D. Retrospective studies and chart reviews. Respir Care Oct 2004;49:1171-74.



1  
2  
3  
4  
5  
6  
7  
8  
9  
10  
11  
12  
13  
14  
15  
16  
17  
18  
19  
20  
21  
22  
23  
24  
25  
26  
27  
28  
29  
30  
31  
32  
33  
34  
35  
36  
37  
38  
39  
40  
41  
42  
43  
44  
45  
46  
47  
48  
49  
50  
51  
52  
53  
54  
55  
56  
57  
58  
59  
60

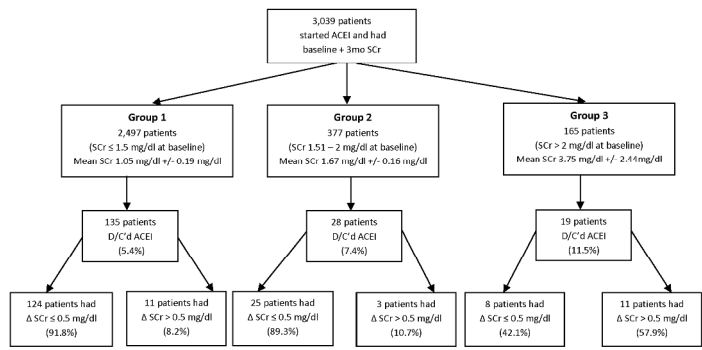

Figure 1. Profile of patients included in analysis.  
ACEI: Angiotensin-Converting Enzyme Inhibitors; ADR: Adverse Drug Reaction; DIC'd: discontinued; SCR: Serum Creatinine.

279x215mm (300 x 300 DPI)

View only

1  
2  
3  
4  
5  
6  
7  
8  
9  
10  
11  
12  
13  
14  
15  
16  
17  
18  
19  
20  
21  
22  
23  
24  
25  
26  
27  
28  
29  
30  
31  
32  
33  
34  
35  
36  
37  
38  
39  
40  
41  
42  
43  
44  
45  
46  
47  
48  
49  
50  
51  
52  
53  
54  
55  
56  
57  
58  
59  
60

Figure 2: Changes in Serum Creatinine at 1 Year for Patients with SCr>2 mg/dL

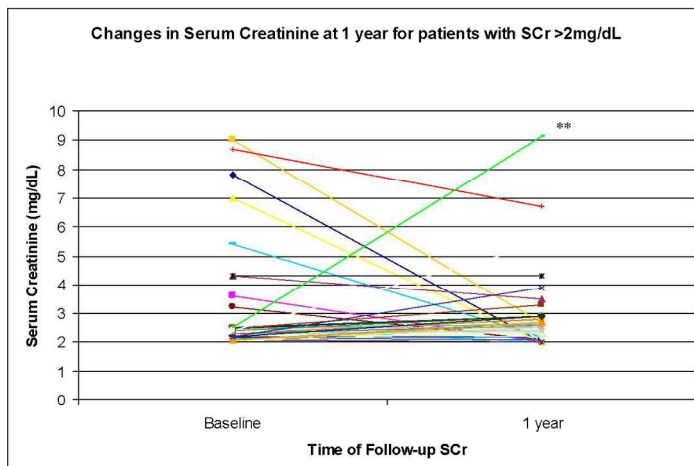

\*The mean change in serum creatinine was -0.24 +/- 0.56 mg/dL with a median of -0.01mg/dL. Excluding outlier (\*\*\*) resulted in a mean in change serum creatinine of -0.44 +/- 1.96 mg/dL with a median of -0.01mg/dL.

N= 35

215x279mm (300 x 300 DPI)

STROBE 2007 (v4) Statement—Checklist of items that should be included in reports of cohort studies

| Section/Topic             | Item # | Recommendation                                                                                                                                                                       | Reported on page # |
|---------------------------|--------|--------------------------------------------------------------------------------------------------------------------------------------------------------------------------------------|--------------------|
| Title and abstract        | 1      | (a) Indicate the study’s design with a commonly used term in the title or the abstract                                                                                               | 1                  |
|                           |        | (b) Provide in the abstract an informative and balanced summary of what was done and what was found                                                                                  | 2                  |
| <b>Introduction</b>       |        |                                                                                                                                                                                      |                    |
| Background/rationale      | 2      | Explain the scientific background and rationale for the investigation being reported                                                                                                 | 3-4                |
| Objectives                | 3      | State specific objectives, including any prespecified hypotheses                                                                                                                     | 4                  |
| <b>Methods</b>            |        |                                                                                                                                                                                      |                    |
| Study design              | 4      | Present key elements of study design early in the paper                                                                                                                              | 5                  |
| Setting                   | 5      | Describe the setting, locations, and relevant dates, including periods of recruitment, exposure, follow-up, and data collection                                                      | 5-6                |
| Participants              | 6      | (a) Give the eligibility criteria, and the sources and methods of selection of participants. Describe methods of follow-up                                                           | 5-6                |
|                           |        | (b) For matched studies, give matching criteria and number of exposed and unexposed                                                                                                  | N/A                |
| Variables                 | 7      | Clearly define all outcomes, exposures, predictors, potential confounders, and effect modifiers. Give diagnostic criteria, if applicable                                             | 6                  |
| Data sources/ measurement | 8*     | For each variable of interest, give sources of data and details of methods of assessment (measurement). Describe comparability of assessment methods if there is more than one group | 5                  |
| Bias                      | 9      | Describe any efforts to address potential sources of bias                                                                                                                            | 6                  |
| Study size                | 10     | Explain how the study size was arrived at                                                                                                                                            | 5                  |
| Quantitative variables    | 11     | Explain how quantitative variables were handled in the analyses. If applicable, describe which groupings were chosen and why                                                         | 6                  |
| Statistical methods       | 12     | (a) Describe all statistical methods, including those used to control for confounding                                                                                                | 6                  |
|                           |        | (b) Describe any methods used to examine subgroups and interactions                                                                                                                  | N/A                |
|                           |        | (c) Explain how missing data were addressed                                                                                                                                          | N/A                |
|                           |        | (d) If applicable, explain how loss to follow-up was addressed                                                                                                                       | 6                  |
|                           |        | (e) Describe any sensitivity analyses                                                                                                                                                | N/A                |
| <b>Results</b>            |        |                                                                                                                                                                                      |                    |

|                          |     |                                                                                                                                                                                                              |            |
|--------------------------|-----|--------------------------------------------------------------------------------------------------------------------------------------------------------------------------------------------------------------|------------|
| Participants             | 13* | (a) Report numbers of individuals at each stage of study—eg numbers potentially eligible, examined for eligibility, confirmed eligible, included in the study, completing follow-up, and analysed            | 8,18       |
|                          |     | (b) Give reasons for non-participation at each stage                                                                                                                                                         | N/A        |
|                          |     | (c) Consider use of a flow diagram                                                                                                                                                                           | N/A        |
| Descriptive data         | 14* | (a) Give characteristics of study participants (eg demographic, clinical, social) and information on exposures and potential confounders                                                                     | 8,14-15    |
|                          |     | (b) Indicate number of participants with missing data for each variable of interest                                                                                                                          | N/A        |
|                          |     | (c) Summarise follow-up time (eg, average and total amount)                                                                                                                                                  | 8,18       |
| Outcome data             | 15* | Report numbers of outcome events or summary measures over time                                                                                                                                               | 8-9,17     |
| Main results             | 16  | (a) Give unadjusted estimates and, if applicable, confounder-adjusted estimates and their precision (eg, 95% confidence interval). Make clear which confounders were adjusted for and why they were included | 8-10,17    |
|                          |     | (b) Report category boundaries when continuous variables were categorized                                                                                                                                    | 8-10,14-17 |
|                          |     | (c) If relevant, consider translating estimates of relative risk into absolute risk for a meaningful time period                                                                                             | N/A        |
| Other analyses           | 17  | Report other analyses done—eg analyses of subgroups and interactions, and sensitivity analyses                                                                                                               | N/A        |
| <b>Discussion</b>        |     |                                                                                                                                                                                                              |            |
| Key results              | 18  | Summarise key results with reference to study objectives                                                                                                                                                     | 8-10       |
| <b>Limitations</b>       |     |                                                                                                                                                                                                              |            |
| Interpretation           | 20  | Give a cautious overall interpretation of results considering objectives, limitations, multiplicity of analyses, results from similar studies, and other relevant evidence                                   | 11-13      |
| Generalisability         | 21  | Discuss the generalisability (external validity) of the study results                                                                                                                                        | 13         |
| <b>Other information</b> |     |                                                                                                                                                                                                              |            |
| Funding                  | 22  | Give the source of funding and the role of the funders for the present study and, if applicable, for the original study on which the present article is based                                                | 20         |

\*Give information separately for cases and controls in case-control studies and, if applicable, for exposed and unexposed groups in cohort and cross-sectional studies.

**Note:** An Explanation and Elaboration article discusses each checklist item and gives methodological background and published examples of transparent reporting. The STROBE checklist is best used in conjunction with this article (freely available on the Web sites of PLoS Medicine at <http://www.plosmedicine.org/>, Annals of Internal Medicine at <http://www.annals.org/>, and Epidemiology at <http://www.epidem.com/>). Information on the STROBE Initiative is available at [www.strobe-statement.org](http://www.strobe-statement.org).

# BMJ Open

## Rates and Predictors of Angiotensin-Converting Enzyme Inhibitor Discontinuation Subsequent to Elevated Serum Creatinine: A Retrospective Cohort Study

|                                 |                                                                                                                                                                                                                                                                                           |
|---------------------------------|-------------------------------------------------------------------------------------------------------------------------------------------------------------------------------------------------------------------------------------------------------------------------------------------|
| Journal:                        | <i>BMJ Open</i>                                                                                                                                                                                                                                                                           |
| Manuscript ID:                  | bmjopen-2014-005181.R2                                                                                                                                                                                                                                                                    |
| Article Type:                   | Research                                                                                                                                                                                                                                                                                  |
| Date Submitted by the Author:   | 15-Jul-2014                                                                                                                                                                                                                                                                               |
| Complete List of Authors:       | Jackevicius, Cynthia; Western University of Health Sciences, Wong, Joyce; Western University of Health Sciences, Aroustamian, Irina; Western University of Health Sciences, Gee, Manyee; VA Greater Los Angeles Healthcare System, Mody, Freny; VA Greater Los Angeles Healthcare System, |
| <b>Primary Subject Heading</b>: | General practice / Family practice                                                                                                                                                                                                                                                        |
| Secondary Subject Heading:      | Pharmacology and therapeutics                                                                                                                                                                                                                                                             |
| Keywords:                       | INTERNAL MEDICINE, Adverse events < THERAPEUTICS, Chronic renal failure < NEPHROLOGY                                                                                                                                                                                                      |
|                                 |                                                                                                                                                                                                                                                                                           |

SCHOLARONE™  
Manuscripts

1  
2  
3 **Rates and Predictors of Angiotensin-Converting Enzyme Inhibitor Discontinuation**  
4  
5  
6  
7 **Subsequent to Elevated Serum Creatinine: A Retrospective Cohort Study**  
8  
9

10  
11  
12  
13  
14 Cynthia A. Jackevicius, BScPhm, MSc, PharmD<sup>1, 2, 3, 4, 5</sup>, Joyce Wong, PharmD<sup>1</sup>, Irina  
15 Aroustamian, PharmD<sup>1</sup>, Manyee Gee, PhD<sup>2</sup>, Freny Vaghaiwalla Mody, MD FACC<sup>2, 6</sup>  
16  
17  
18

19  
20 Department of Pharmacy Practice and Administration, Western University of Health  
21 Sciences<sup>1</sup>, Department of Medicine & Pharmacy, Veteran Affairs Greater Los Angeles  
22 Healthcare System<sup>2</sup>, Institute of Health Policy, Management and Evaluation, Faculty of  
23 Medicine, University of Toronto<sup>3</sup>, Institute for Clinical Evaluative Sciences<sup>4</sup>, Department of  
24 Pharmacy, University Health Network<sup>5</sup>, Division of Cardiology, Department of Medicine,  
25 David Geffen School of Medicine, University of California Los Angeles<sup>6</sup>  
26  
27  
28  
29  
30  
31  
32

33  
34  
35  
36 Corresponding author:

37  
38 Freny Vaghaiwalla Mody, MD  
39

40  
41 VA Greater Los Angeles Healthcare System & David Geffen School of Medicine at UCLA  
42

43  
44 Phone: 310-268-3839 Fax: 310-268-4391 Email: freny.mody@va.gov  
45  
46  
47

48 Running Title: Predictors of ACEI Discontinuation  
49

50 Word count: 2753  
51  
52

53 **Key Words:** ACE inhibitors, serum creatinine, renal dysfunction, drug utilization, chronic  
54 kidney disease  
55  
56  
57  
58  
59  
60

## Abstract

Objectives: Angiotensin-converting enzyme inhibitors (ACEI) are underutilized despite cardiovascular benefits, in part due to concerns of known transient elevations in serum creatinine (SCr) after initiation. Our objectives were to evaluate rates and predictors of ACEI discontinuation after SCr elevation post-ACEI initiation since limited data are available that examine this issue.

Setting: Primary and tertiary Veterans healthcare system in Los Angeles, California

Participants: 3,039 outpatients initiating an ACEI with a SCr measured within 6 months prior to and approximately 3 months after initiating an ACEI. Patients were divided into 3 groups (SCr<1.5, 1.5-2.0 and >2.0).

Primary and Secondary Outcome Measures: Rates and factors associated with ACEI discontinuation subsequent to SCr elevation after ACEI initiation and for patients with baseline SCr>2mg/dL, the change in SCr associated with chronic use. Predictors were identified using multivariate logistic regression modeling.

Results: At 3 months follow-up, for those with an increase in SCr, the mean increase post-ACEI initiation was 26%, ranging from -0.01 mg/dL to 0.42 mg/dL varying according to level of baseline renal function. ACEI discontinuation was higher in patients with elevated baseline SCr (19/165, 11.5%) compared with those with SCr<1.5 (135/2,497, 5.4%), and those with SCr 1.5-2.0 (28/377, 7.4%). Male patients, and those with heart failure were less likely to discontinue ACEI after an elevation of serum creatinine post-ACEI initiation, while those taking NSAIDs, diuretics and beta-blockers were more likely to discontinue ACEI.

Conclusions: Serum creatinine increases <30% on average within 3 months of ACEI initiation,

1  
2  
3 with subsequent discontinuation rates varying by baseline SCr. Elevation in SCr was not  
4  
5 associated with ACEI discontinuation rates. In patients with SCr>2 mg/dL at baseline, despite an  
6  
7 acute increase in SCr after ACEI initiation, chronic ACEI use was associated with a decrease in  
8  
9 SCr in most patients.  
10  
11  
12  
13  
14  
15  
16  
17  
18  
19  
20  
21  
22  
23  
24  
25  
26  
27  
28  
29  
30  
31  
32  
33  
34  
35  
36  
37  
38  
39  
40  
41  
42  
43  
44  
45  
46  
47  
48  
49  
50  
51  
52  
53  
54  
55  
56  
57  
58  
59  
60

For peer review only



## Article Summary

### Strengths and Limitations of this Study

- To date, no studies have evaluated both the acute elevation in serum creatinine post-ACE inhibitor initiation and the predictors of subsequent discontinuation following an elevated serum creatinine.
- This study confirmed the mean increase in serum creatinine after ACE inhibitor initiation is 26%, varying with baseline renal function.
- Factors other than elevation in serum creatinine were associated with ACE inhibitor discontinuation, including, female sex, absence of heart failure, and use of NSAIDs, diuretics or beta-blockers.

## Introduction

Current guidelines recommend angiotensin-converting enzyme inhibitors (ACEIs) as the standard of therapy for post-myocardial infarction, chronic heart failure (CHF), and diabetes due to the substantial endothelial, cardiovascular and renal protection.<sup>1-4</sup> Furthermore, ACEIs have also been shown to be a beneficial therapy for hypertension.<sup>5</sup> The renal protective mechanism of ACEIs vary, ranging from improving vascular endothelium function to vasodilatation effects.<sup>6</sup> Despite evidence from numerous trials showing the benefits of improved morbidity and mortality by ACEIs, these drugs are still underutilized.<sup>1-4, 7-10</sup> Clinicians are reluctant to start and continue with adequate dosing of ACEIs primarily due to concerns of elevations in serum creatinine (SCr), particularly in patients with CKD despite evidence that this group of patients benefits from ACEI.<sup>10,11</sup> The most probable cause of an acute elevation in SCr post-ACEI initiation is the decrease in vasoconstriction in the efferent arterioles resulting in pressure reduction in the glomerular apparatus and decreased glomerular filtration rate (GFR).<sup>6</sup> However, homeostasis of hemodynamics occurs with long-term use with gradual return and improvement in GFR.<sup>7</sup> Even with concerns of an acute rise in SCr, ACEIs provide long-term benefits with some data suggesting an improvement in renal function with decrease in SCr with long-term use.<sup>7,11,12</sup> In heart failure (HF) patients, RCTs estimate that between 2.4% and 16% of patients experience an acute increase in SCr of > 0.5mg/dL after ACEI initiation, with improvement with chronic use.<sup>8-9</sup> In a practice-based setting, Bakris and colleagues demonstrated a mean increase in SCr of 30% in a hypertensive population using ACEIs with the increase stabilizing within 2 months after ACEI initiation. This rise in SCr is proportional to the baseline SCr, such that a 30% increase at a SCr of 2 would be 2.6 while at a SCr of 1, it would be only 1.3, it is reversible upon discontinuation, and it is less likely to occur beyond 4 weeks of initiation.<sup>13,14</sup> HF patients suffer

1  
2  
3 a more pronounced increase in SCr with ACEIs due to a reduction of blood flow to the kidneys  
4  
5 from reduced cardiac output, diuretic use, and vasodilation effect. Although the acute increase in  
6  
7 SCr seen in HF patients ranges from 75% to 200% from baseline after ACEI initiation, this  
8  
9 elevation was suggested as being acceptable since ACEIs have proven benefits in decreasing  
10  
11 mortality in this population.<sup>8,15</sup>  
12  
13

14  
15 The frequency of the discontinuation rate of ACEI and the determinant factors associated  
16  
17 with discontinuation in the real world setting has not been fully characterized. The  
18  
19 CONSENSUS II HF trial reported a discontinuation rate of 4.6% with enalapril subsequent to the  
20  
21 rise of SCr, while a meta-analysis of randomized controlled trials of HF patients found an ACEI  
22  
23 discontinuation rate of 13.8%, of which only 0.4% was attributed to an increase in SCr.<sup>7,16</sup>  
24  
25  
26

27 To date, no studies have evaluated both the acute elevation in SCr post-ACEI initiation  
28  
29 and the predictors of subsequent discontinuation following an elevated SCr. Assessment of these  
30  
31 patterns may provide insight into clinician decision making in a real world setting. The objective  
32  
33 of our study was to assess the rates and predictors of ACEI discontinuation following an increase  
34  
35 in SCr post-ACEI initiation, each according to baseline renal function.  
36  
37  
38  
39  
40  
41  
42  
43  
44  
45  
46  
47  
48  
49  
50  
51  
52  
53  
54  
55  
56  
57  
58  
59  
60

## Methods

We conducted a retrospective observational cohort study of all outpatients initiating an ACEI between 2002 and 2004 at the Veterans Affairs Greater Los Angeles Healthcare System (VAGLAHS). The Veterans Health Information System and Technology Architecture (VISTA) database was used to gather patient information (demographics, medication use, allergies, comorbidities, and lab results).

Initiation of ACEI was defined as the dispensing of an outpatient prescription for an ACEI with no previous record of ACEI use in the past 6 months. The following ACEI information was collected: initiation date, discontinuation date, adverse drug reactions (ADR), dosage, dosing frequency and the total daily dose. To determine the prevalence of a change in SCr, SCr was recorded at baseline (within 6 months of ACEI initiation) and 3-months (10-14 weeks) post-initiation. If SCr data was not available between 10-14 weeks (3 months), the data value of the most proximal assay was recorded. A 0.5mg/dL increase and 30% increase in SCr was considered to be clinically important since several studies have used this as a reference point to define a decrease in renal function.<sup>5-6,14</sup> Discontinuation of ACEI was defined as no refills within 90 days after the last filled prescription which allowed a lenient grace period for patients obtaining late refills. Patients were stratified into three baseline SCr groups (group 1: SCr <1.5mg/dL; group 2: 1.6-2.0mg/dL; and group 3: >2.0mg/dL) for analysis. We assessed above and below 0.5mg/dL and 30% to determine the threshold at which discontinuation occurred and to analyze possible differences in threshold by group. For those patients with a baseline SCr >2mg/dL and continued on an ACEI, SCr was recorded at 1-year to detect any changes post-initiation. Comorbidities (defined by ICD-9 codes: 425-cardiomyopathy, 428-congestive heart failure, 250-diabetes, 410-414-coronary artery disease, 274-gout, 401-hypertension) and

1  
2  
3 concurrent use of NSAIDs, diuretics, and beta-blockers were documented to determine potential  
4 factors associated with an increase in SCr and the discontinuation of ACEIs. Concomitant  
5 medication use was defined as having an active prescription within 1 month of the index date of  
6 ACEI prescription through the time of discontinuation.  
7  
8  
9  
10  
11

12 The endpoints of this study were: the proportion of patients with a significant increase in  
13 SCr post-ACEI initiation at 3-months follow-up defined as  $>0.5\text{mg/dL}$  or  $>30\%$  of baseline by  
14 group; the proportion of patients with ACEI discontinued following a rise in SCr by group; the  
15 threshold of increase in SCr associated with ACEI discontinuation, stratified by baseline SCr  
16 groups; factors (patient characteristics, comorbidities, and concurrent medications) that may be  
17 associated with discontinuation of ACEIs; and the change in SCr in patients with baseline SCr  
18  $>2\text{mg/dL}$  and continued on ACEIs for 1 year.  
19  
20  
21  
22  
23  
24  
25  
26  
27  
28

29 Continuous baseline characteristics were expressed as the mean  $\pm$ SD or median; and  
30 categorical baseline characteristics were expressed as a proportion. Chi square test was used to  
31 compare the discontinuation rate after detecting a rise in SCr post-ACEI use between groups and  
32 to compare the threshold of increase in SCr prior to discontinuation between groups. A multiple  
33 logistic regression model was constructed to identify the factors associated with SCr elevation  
34 subsequent to ACEI initiation and ACEI discontinuation. The univariate model included patient  
35 characteristics (i.e., age, gender), comorbidities (i.e., diabetes, hypertension, coronary artery  
36 disease, chronic heart failure, systolic blood pressure (SBP) $<100\text{mmHg}$ , gout), concomitant  
37 NSAID use, diuretic use (i.e. thiazide, loop,  $\text{K}^+$  sparing), beta-blocker use, and significant SCr  
38 elevation defined as  $>0.5\text{mg/dL}$  or  $>30\%$  of baseline. Variables with  $p < 0.2$  from the univariate  
39 model were placed in a multiple logistic regression model using stepwise selection. Odds ratio  
40 with 95% confidence interval were estimated from the regression model. A p-value  $< 0.05$  was  
41  
42  
43  
44  
45  
46  
47  
48  
49  
50  
51  
52  
53  
54  
55  
56  
57  
58  
59  
60

1  
2  
3 considered statistically significant. All results were analyzed using SAS [Version 8.2, SAS  
4  
5  
6 Institute, Cary, NC]. This was a non-funded study approved by the institutional review board at  
7  
8 VAGLAHS and Western University of Health Sciences.  
9  
10  
11  
12  
13  
14  
15  
16  
17  
18  
19  
20  
21  
22  
23  
24  
25  
26  
27  
28  
29  
30  
31  
32  
33  
34  
35  
36  
37  
38  
39  
40  
41  
42  
43  
44  
45  
46  
47  
48  
49  
50  
51  
52  
53  
54  
55  
56  
57  
58  
59  
60

For peer review only

## Results

At a total of 3,039 patients were initiated on an ACEI between January 2002 and December 2004 and had a SCr measured within 6 months prior to and 3 months after initiating an ACEI. (Figure 1) The average age was 65.0 years and 97.6% were male with a baseline SCr of 1.28 $\pm$ 0.86 mg/dL. Patients were stratified into three groups based on baseline SCr: Group 1 consisted of 2,497 patients with a SCr of <1.5 mg/dL (mean of 1.05 $\pm$  0.19); group 2 had 377 patients with a SCr of 1.5-2.0 mg/dL (mean of 1.67  $\pm$ 0.16); and group 3 had 165 patients with a SCr of >2.0 mg/dL (mean of 3.75 $\pm$ 2.44). (Figure 1) Hypertension (44.2%) and diabetes (28.5%) were the most frequently documented comorbidities, and the most common concomitant medications were diuretics and beta-blockers. (Table 1)

On average, patients had a follow-up SCr available at a median of 3.8 months post-ACEI initiation. The mean changes in SCr at 3 months follow-up most proximal to the 3-month interval were 0.05  $\pm$ 0.30 mg/dL, -0.01 $\pm$ 0.31 mg/dL, and 0.42  $\pm$ 2.20 mg/dL respectively, by group ( $p$ >0.05 vs. baseline for all groups). There was no change in median SCr at 3 months follow-up for all three groups. Counting only those patients with an increase in SCr for all 3 groups, based on an increase from baseline SCr ( $n$ =182), the average percent increase in SCr prior to ACEI discontinuation was 25.98%  $\pm$ 41.72 with a median of 13.49%.

At 3 months, the discontinuation rate of ACEI with or without concomitant SCr rise of >0.5mg/dL was highest in group 3 (11.5%), followed by group 2 (7.4%) and group 1 (5.4%) ( $p$ <0.001) (Figure 1). In the multiple logistic regression model the variables significantly associated with a greater likelihood of ACEI discontinuation were the use of NSAIDs, diuretics, and beta-blockers. (Table 2) Of note, a significant increase in SCr (defined as >0.5mg/dl or >30 %) was not associated with ACEI discontinuation. ( $p$ =0.498 in the univariate model). A history of CHF,

1  
2  
3 SBP of <100mmHg at baseline and male sex were significantly associated with a reduced  
4  
5 likelihood of ACEI discontinuation.  
6  
7

8 Changes in SCr were further evaluated based on absolute and percent change. Table 3  
9  
10 depicts the change in SCr prior to ACEI discontinuation, at the threshold of 0.5mg/dL and 30%  
11  
12 increase in SCr (in 182 patients [5.9%] of all patients initiated on ACEI who had an increase in  
13  
14 SCr). Group 3 had the highest mean increase in SCr as both absolute and percent change. A  
15  
16 majority of the patients who experienced an increase in SCr had a change less than both 30%  
17  
18 increase and 0.5mg/dL increase prior to discontinuation. Thus, most ACEI discontinuation did  
19  
20 not occur following a clinically significant increase in SCr (>30% or >0.5mg/dL above baseline).  
21  
22  
23

24  
25 Of the 165 patients with a baseline SCr >2.0mg/dL (mean 3.75+/-2.44), only 50 patients  
26  
27 (30.3%) were continued on an ACEI at 1 year. A total of 69 of the 165 (41.8%) patients  
28  
29 experienced a decrease in SCr prior to discontinuation (average decrease was 1.04 +/- 1.77) and  
30  
31 76 (46.0%) of the patients experienced an increase (average increase was 1.86+/-0.87) and 20  
32  
33 (12.1%) patients experienced no change from baseline prior to discontinuation. Of the 50  
34  
35 patients who continued on ACEIs, only 35 patients had a follow-up in SCr at 1 year and their  
36  
37 mean decrease in SCr was -0.24 +/-0.56 with a median decrease of -0.01mg/dL. Of these 35  
38  
39 patients, one (2.86%) had a larger increase in SCr (from 2.5 to 9.1 mg/dL) as compared with the  
40  
41 remaining patients in the group (Figure 2). Excluding this subject as an outlier with a rise in SCr  
42  
43 at 1 year that is unlikely due to ACEI, resulted in a mean decrease in SCr at 1 year in group 3 of -  
44  
45 0.44+/-1.96 with a median of -0.01mg/dL. While the majority (54.28%) of patients in Group 3  
46  
47 experienced a clinically significant absolute (>0.5 mg/dL) increase in SCr of 0.98+/-1.58  
48  
49 compared with a baseline of 3.75+/-2.44, the 27% relative increase was not above the generally  
50  
51 accepted threshold of >30%. Forty percent of this group experienced a decrease in SCr of  
52  
53  
54  
55  
56  
57  
58  
59  
60



1  
2  
3 1.19+/-2.26 compared to baseline 3.75+/-2.44 and 5.7% had no change in SCr at 1-year follow-  
4  
5 up. The average magnitude of decrease in SCr was greater than the average magnitude of  
6  
7 increase in SCr with long term use of ACEI (1.19+/-2.26 mg/dL decrease versus 0.98 +/-  
8  
9 1.58mg/dL increase, p<0.001) in patients with SCr>2 mg/dL.  
10  
11  
12  
13  
14  
15  
16  
17  
18  
19  
20  
21  
22  
23  
24  
25  
26  
27  
28  
29  
30  
31  
32  
33  
34  
35  
36  
37  
38  
39  
40  
41  
42  
43  
44  
45  
46  
47  
48  
49  
50  
51  
52  
53  
54  
55  
56  
57  
58  
59  
60

For peer review only

## Discussion

In our study, which had a large hypertensive population, we showed an increase in SCr of approximately 26% post-ACEI initiation, for those with an increase in SCr. Previous studies have documented similar acute increases in SCr of 30% in hypertensive patients and up to 200% in HF patients.<sup>13,14</sup> It has been suggested that ACEI discontinuation be considered if an increase in SCr exceeds 30% with ACEI use since renal function may be compromised beyond this increase and the benefits of ACEI may not outweigh the risks.<sup>13</sup> Our study showed that the majority of ACEI discontinuation occurred with an increase of less than 30% in SCr, thus suggesting that the threshold of concern for renal deterioration is lower in clinical practice or other factors may be more likely associated with discontinuation.

According to previous trials, a change in SCr of  $>0.5\text{mg/dL}$  may also be considered clinically significant.<sup>8,9</sup> The majority of the patients that discontinued ACEI in our study experienced a  $<0.5\text{mg/dL}$  change in SCr. Our study further suggested that on average, SCr was not greatly affected by ACEI since all three groups had no change in median SCr over 3 months. Thus, the discontinuation of ACEI in our population was most likely attributed to drug intolerances, such as, cough, other comorbidities, and concomitant medications, rather than the change in SCr. Only 6% of patients in the lower baseline SCr group suffered from documented cough or nausea leading to the discontinuation of ACEI. The adjusted regression analysis demonstrated that concomitant use of NSAIDs, diuretics, and beta-blockers were factors associated with a higher likelihood of ACEI discontinuation. This may be anticipated since both NSAIDs and diuretics have been documented to decrease renal function and exacerbate SCr elevations when used concomitantly with ACEI.<sup>12</sup> However, this may have led to the discontinuation of ACEI at a lower threshold of SCr increase. If discontinuation of ACEI was

1  
2  
3 indeed at a lower threshold than that traditionally accepted (SCr rise >0.5 or 30%), improved  
4 awareness for clinicians of the short duration of an acute rise in SCr when initiating ACEI, and  
5  
6 dose reduction or reassessment of need for concomitant NSAIDs or diuretics may be beneficial  
7  
8 strategies. This may confer better clinical outcomes for patients, particularly diabetic patients  
9  
10 who would benefit from the nephroprotective actions of ACEI. Contrary to previous findings,  
11  
12 beta-blockers were associated with a higher likelihood of discontinuation with concomitant use  
13  
14 of ACEI in our study rather than exerting a renoprotective effect with ACEI use.<sup>14</sup> Male sex,  
15  
16 CHF history, and SBP of <100mmHg were also associated with a lower chance of ACEI  
17  
18 discontinuation. We postulated that patients with CHF and SBP <100mmHg were more likely to  
19  
20 be maintained on an ACEI since HF studies have documented benefits of ACEI in decreasing  
21  
22 morbidity and mortality.<sup>1,7-8</sup>  
23  
24  
25  
26  
27  
28

29 In patients with baseline SCr >2 mg/dL, our study showed that SCr can increase,  
30  
31 decrease, or remain unchanged with long term ACEI use. Even though the majority of these  
32  
33 patients experienced an acute increase in SCr, our results support ACEI use in renal impaired  
34  
35 patients since the median change in SCr decreased and in the long term, the magnitude of  
36  
37 decrease was much more impressive than the magnitude of increase. Our study is consistent  
38  
39 with the prospective findings by Hou et al and retrospective findings by Hirsch et al, who both  
40  
41 found that despite the acute increase in SCr, long term improvement in SCr occurs in many  
42  
43 patients with impaired renal function at baseline.<sup>11,15,16</sup> The use of ACEI is warranted in this  
44  
45 group of patients, along with close monitoring of renal function and electrolytes since benefits  
46  
47 were documented in this study as well as in previous studies.<sup>11-12,17-20</sup>  
48  
49  
50  
51  
52

53 Limitations of our study include its retrospective study design with potential for  
54  
55 confounding.<sup>21</sup> Given our VA population, the vast majority of patients were male, limiting  
56  
57  
58  
59  
60

1  
2  
3 generalizability to female patients. In addition, the electronic medical records may not be  
4 complete and accurate as is a limitation of any study relying on retrospective medical chart  
5 extraction. We did not have data on the peak creatinine, nor comprehensive assessment of all  
6 adverse events given our data extraction methods. Finally, the sample size of patients with SCr  
7 >2 mg/dL was small both pre- and post-follow-up of SCr, particularly at 1-year follow-up.  
8  
9 Exploration of the reasons for ACEI discontinuation long-term in this group would be beneficial.  
10  
11 However, the large population-based sample increases the generalizability of the findings.  
12  
13  
14

15  
16  
17  
18  
19  
20 Many clinicians may be reluctant to prescribe ACEIs to all eligible patients due to  
21 concerns of an elevation in SCr. Based on this real world study, the magnitude of increase in  
22 SCr post-ACEI initiation was slightly lower than the commonly used threshold of 30%. We  
23 found that, instead of a clinically meaningful rise in SCr, ACEI discontinuation may be more  
24 likely associated with either comorbidities, concomitant medications that may increase SCr, or a  
25 low threshold of concern for SCr elevations. Identification of other factors that may increase  
26 SCr, such as, NSAID use, diuretic use, and volume depletion should be considered before an  
27 ACEI is discontinued. The importance of monitoring should be emphasized to detect any drastic  
28 increase in SCr >30% and to manage potential adverse drug reactions. Education may be  
29 required to change practice patterns in patients with impaired baseline renal function in order to  
30 confer the clinical benefit of chronic ACEI nephroprotection.  
31  
32  
33  
34  
35  
36  
37  
38  
39  
40  
41  
42  
43  
44  
45  
46  
47  
48  
49  
50  
51  
52  
53  
54  
55  
56  
57  
58  
59  
60

**Author Contributions:**

Jackevicius: Concept/design, data interpretation, critical revision of article, approval of article, statistics

Wong: Design, data analysis/interpretation, drafting article, approval of article, statistics

Aroustamian: Data analysis, critical revision of article, approval of article, statistics

Gee: Data collection/interpretation, critical revision of article, approval of article

Mody: Concept/design, data interpretation, critical revision of article, approval of article

**Funding:** None.

**Data Sharing:** No additional data available.

**Acknowledgments:** None.

**Table 1. Baseline characteristics of cohort (n= 3,039)**

| Characteristic                                       | Value*                                      |
|------------------------------------------------------|---------------------------------------------|
| Age (years, mean+/-SD, median)                       | 65 +/-12, 65                                |
| Gender (n, %)                                        |                                             |
| Male                                                 | 2966 97.6%                                  |
| Ethnicity (n, %)                                     |                                             |
| African American                                     | 414 13.6%                                   |
| Caucasian                                            | 670 22.0%                                   |
| Hispanic                                             | 44 1.45%                                    |
| Other                                                | 341 11.2%                                   |
| Not documented                                       | 1570 51.7%                                  |
| Baseline serum creatinine (mg/dL, mean+/-SD, median) | Mean+/-SD, Median                           |
| Overall (n=3,039)                                    | Overall: Overall: 1.28 +/- 0.86, 1.10       |
| Group 1 : < 1.5mg/dL (n=2,497)                       | Group 1 : < 1.5mg/dL = 1.05 +/-0.19, 1.03   |
| Group 2 : 1.5-2.0 mg/dL (n=377)                      | Group 2 : 1.5-2.0 mg/dL = 1.67 +/-0.16, 1.6 |
| Group 3 : > 2 mg/dL (n=165)                          | Group 3 : > 2 mg/dL = 3.75+/-2.44, 2.7      |

---

| Co-morbidities (n, %)   | n    | %      |
|-------------------------|------|--------|
| Diabetes Mellitus       | 866  | 28.5 % |
| Hypertension            | 1343 | 44.2 % |
| Chronic Heart Failure   | 177  | 5.8 %  |
| Coronary Artery Disease | 445  | 14.6 % |
| Gout                    | 69   | 2.3 %  |
| SBP <100 mmHg           | 88   | 2.9 %  |
| Concomitant Use of:     |      |        |
| NSAIDs                  | 1053 | 34.6 % |
| Diuretics (total)       | 1771 | 58.3 % |
| Loops                   | 773  | 25.4 % |
| Thiazides               | 1264 | 41.6 % |
| K- sparing              | 239  | 7.9 %  |
| Beta-blockers           | 1601 | 52.7 % |

---

\*Values are reported as mean +/- SD; median unless otherwise noted

**Table 2. Multivariate odds ratios for discontinuation of angiotensin-converting enzyme inhibitors subsequent to elevation of SCr post-ACEI initiation**

| Co morbidities          | Multivariate<br>Odds Ratio<br>(95% CI) | P value |
|-------------------------|----------------------------------------|---------|
| Age                     | 1.00(1.00-1.00)*                       | 0.452   |
| Gender (Male)           | 0.74 (0.57-0.97)                       | 0.028   |
| Coronary Artery Disease | 0.89 (0.79-1.01)                       | 0.061   |
| Chronic Heart Failure   | 0.79 (0.63-0.99)                       | 0.041   |
| SBP <100mmHg            | 0.55 (0.40-0.76)                       | <0.001  |
| Concomitant use of:     |                                        |         |
| NSAIDs                  | 1.23(1.13-1.34)                        | <0.001  |
| Diuretics               | 1.07( 0.87-1.31)                       | <0.001  |
| Thiazides               | 1.18 (0.98-1.42)                       | 0.084   |
| Loops                   | 0.99 (0.84-1.18)                       | 0.925   |
| Beta-blockers           | 1.17( 1.08-1.27)                       | <0.001  |

\* Values rounded from 0.999( 0.995-1.002)



**Table 3. Distribution in magnitude of elevation of serum creatinine in patients who discontinued angiotensin-converting enzyme inhibitors within 90 days post-initiation**

| Threshold of increase in SCr | Group 1<br>< 1.5mg/dL<br>n=135            | Group 2<br>1.5-2mg/dL<br>n=28          | Group 3<br>> 2mg/dL<br>n=19              | P value |
|------------------------------|-------------------------------------------|----------------------------------------|------------------------------------------|---------|
| ≤ 0.5mg/dL increase          | 124 (91.85)<br>0.17 +/-0.11; 0.10         | 25(89.29)<br>0.18+/- 0.8; 0.17         | 8 (42.10)<br>0.27+/- 0.14; 0.3           | <0.001  |
| > 0.5mg/dL increase          | 11 (8.15)<br>1.23 +/- 0.99; 0.80          | 3 (10.71)<br>0.87 +/-0.25; 0.9         | 11 (57.90)<br>2.95 +/- 2.93; 1.7         | <0.001  |
| ≤ 30% increase               | 114 (84.45)<br>14.15%+/- 6.85%;<br>11.11% | 25 (89.29)<br>10.22%+/- 4.6%;<br>9.25% | 12 (63.15)<br>12.82%+/-6.64%;<br>12.99%  | 0.01    |
| > 30% increase               | 21 (15.55)<br>89.25%+/-81.07%;<br>46.67%  | 3 (10.71)<br>45.83% +/- 8.78%;<br>45%  | 7 (36.85)<br>100.32%+/-69.10%;<br>88.23% | <0.001  |

\*Values are n (%) and mean+/- SD; medi

## References

1. Hung SA, Abraham WT, Chin MH, et al. ACC/AHA 2005 guideline update for the diagnosis and management of chronic heart failure in the adult: a report of the American College of Cardiology/American Heart Association Task Force on Practice Guidelines (Writing Committee to Update the 2001 Guidelines for the Evaluation and Management of Heart Failure). American College of Cardiology Web Site. Available at: <http://www.acc.org/clinical/guidelines/failure//index.pdf>.
2. Antman EM, Anbe DT, Armstrong PW, et al. ACC/AHA Guidelines for the management of patients with ST-elevation myocardial infarction- Executive Summary. J Am Coll Cardiol 2004;44:671-7.
3. American Diabetes Association. Standards of Medical Care in Diabetes-2014. Diabetes Care 2014;37:S5-S13.
4. Marre M, Leblanc H, Suarez L, et al. Converting enzyme inhibition and kidney function in normotensive diabetic patients with persistent microalbuminuria. BMJ 1987;294:1448-52.
5. Chobanian AV, Bakris GL, Black HR, et al. The Seventh Report of the Joint National Committee on Prevention, Detection, Evaluation, and Treatment of High Blood Pressure. JAMA 2003;289:2560-72.
6. Matsuda H, Hayashi K, Arakawa K, et al. Zonal heterogeneity in action of angiotensin-converting enzyme inhibitor on renal microcirculation. J Am Soc Nephrol 1999;10:2272-82.
7. Ahmed A, Kiefe C, Allman R, et al. Survival benefits of angiotensin converting enzyme inhibitors in older heart failure patients with perceived contraindications. J Amer Ger Soc 2002;50:1659-66.

- 1  
2  
3 8. The CONSENSUS Trial Study Group. Effects of enalapril on mortality in severe congestive heart failure: results of the  
4  
5 Cooperative North Scandinavian Enalapril Survival Study (CONSENSUS). *N Engl J Med* 1986;316:1429-35.  
6  
7
- 8 9. The SOLVD Investigators. Effects of enalapril on mortality and the development of heart failure in asymptomatic patients with  
9  
10 reduced left ventricular ejection fractions. *N Engl J Med* 1987;325:293-302.  
11  
12
- 13 10. Ghali JK, Giles T, Gonzales M, et al. Patterns of physician use of angiotensin converting enzyme inhibitors in the inpatient  
14  
15 treatment of congestive heart failure. *J. La State Med Soc* 1997;149:474-84.  
16  
17
- 18 11. Hou FF, Zhang X, Zhang GH, et al. Efficacy and safety of benazepril for advanced chronic renal insufficiency. *N Engl J Med*  
19  
20 2006;354:131-40.  
21
- 22 12. Schoolwerth AC, Sica D, Ballerma B, et al. Renal considerations in angiotensin converting enzyme inhibitor therapy: A statement  
23  
24 of healthcare professional from the Council on the Kidney in Cardiovascular Disease and the Council of High Blood Pressure  
25  
26 Research of the American Heart Association. *Circulation* 2001;104:1985-91.  
27  
28
- 29 13. Bakris GL, Weir MR. Angiotensin- converting enzyme inhibitor associated elevations in SCr. Is this a cause for concern? *Arch*  
30  
31 *Intern Med* 2000;168:685-88.  
32  
33
- 34 14. Knight E, Glynn R, McIntyre K, et al. Predictors of decreased renal function in patients with heart failure during angiotensin-  
35  
36 converting enzyme inhibitor therapy: results from the Studies of Left Ventricular Dysfunction (SOLVD). *Amer Heart J*  
37  
38 1999;138:849-55.  
39  
40  
41  
42  
43  
44  
45

15. Hirsch S, Hirsch J, Udayan B et al. Tolerating increases in serum creatinine following aggressive treatment of chronic kidney disease, hypertension and proteinuria: pre-renal success. *Am J Nephrol* 2012;36:430-7.
16. Ruggenti P, Remuzzi G. Dealing with renin-angiotensin inhibitors, don't mind serum creatinine. *Am J Nephrol* 2012;36:427-9.
17. Ahmed A. Use of angiotensin-converting enzyme inhibitors in patients with heart failure and renal insufficiency: How concerned should we be by the rise in SCr. *J Amer Ger Soc* 2002;50:1297-1300.
18. Raebel M, Lyons E, Andrade S, et al. Laboratory monitoring of drugs at initiation of therapy in ambulatory care. *J Gen Intern Med* 2005;20:1120-26.
19. Gurwitz JH, Field TS, Harrold LR, et al. Incidence and preventability of adverse drug events among older persons in the ambulatory setting. *JAMA* 2003;289:1107-16.
20. Raebel M, Lyons E, Chester E, et al. Randomized trial to improve safety monitoring of ongoing drug therapy in ambulatory patients. *Pharmacotherapy* 2006;5:626-29.
21. Hess D. Retrospective studies and chart reviews. *Respir Care* Oct 2004;49:1171-74.

1  
2  
3 **Figure Legends**  
4

5  
6 **Figure 1:**  
7

8  
9 **Title: Profile of patients included in the analysis.**  
10  
11

12  
13  
14  
15 **Figure 2:**  
16

17  
18 **Title: Change in Serum Creatinine at 1 Year for Patients with SCr>2mg/dL**  
19

20  
21 **x-axis: Time of Follow-up SCr**  
22

23  
24 **y-axis: Serum Creatinine (,g/dL**  
25  
26  
27  
28  
29  
30  
31  
32  
33  
34  
35  
36  
37  
38  
39  
40  
41  
42  
43  
44  
45  
46  
47  
48  
49

1  
2  
3  
4  
5  
6  
7  
8  
9  
10  
11  
12  
13  
14  
15  
16  
17  
18  
19  
20  
21  
22  
23  
24  
25  
26  
27  
28  
29  
30  
31  
32  
33  
34  
35  
36  
37  
38  
39  
40  
41  
42  
43  
44  
45  
46  
47  
48  
49  
50  
51  
52  
53  
54  
55  
56  
57  
58  
59  
60

For peer review only

# Rates and Predictors of Angiotensin-Converting Enzyme Inhibitor Discontinuation

## Subsequent to Elevated Serum Creatinine: A Retrospective Cohort Study

Cynthia A. Jackevicius, BScPhm, MSc, PharmD<sup>1, 2, 3, 4, 5</sup>, Joyce Wong, PharmD<sup>1</sup>, Irina Aroustamian, PharmD<sup>1</sup>, Manyee Gee, PhD<sup>2</sup>, Freny Vaghaiwalla Mody, MD FACC<sup>2, 6</sup>

Department of Pharmacy Practice and Administration, Western University of Health Sciences<sup>1</sup>, Department of Medicine & Pharmacy, Veteran Affairs Greater Los Angeles Healthcare System<sup>2</sup>, Institute of Health Policy, Management and Evaluation, Faculty of Medicine, University of Toronto<sup>3</sup>, Institute for Clinical Evaluative Sciences<sup>4</sup>, Department of Pharmacy, University Health Network<sup>5</sup>, Division of Cardiology, Department of Medicine, David Geffen School of Medicine, University of California Los Angeles<sup>6</sup>

Corresponding author:

Freny Vaghaiwalla Mody, MD

VA Greater Los Angeles Healthcare System & David Geffen School of Medicine at UCLA

Phone: 310-268-3839 Fax: 310-268-4391 Email: freny.mody@va.gov

Running Title: Predictors of ACEI Discontinuation

Word count: 27~~53~~14

**Key Words:** ACE inhibitors, serum creatinine, renal dysfunction, drug utilization, chronic kidney disease

## Abstract

Objectives: Angiotensin-converting enzyme inhibitors (ACEI) are underutilized despite cardiovascular benefits, in part due to concerns of known transient elevations in serum creatinine (SCr) after initiation. Our objectives were to evaluate rates and predictors of ACEI discontinuation after SCr elevation post-ACEI initiation since limited data are available that examine this issue.

Setting: Primary and tertiary Veterans healthcare system in Los Angeles, California

Participants: 3,039 outpatients initiating an ACEI with a SCr measured within 6 months prior to and approximately 3 months after initiating an ACEI. Patients were divided into 3 groups (SCr<1.5, 1.5-2.0 and >2.0).

Primary and Secondary Outcome Measures: Rates and factors associated with ACEI discontinuation subsequent to SCr elevation after ACEI initiation and for patients with baseline SCr>2mg/dL, the change in SCr associated with chronic use. Predictors were identified using multivariate logistic regression modeling.

Results: At 3 months follow-up, for those with an increase in SCr, the mean increase post-ACEI initiation was 26%, ranging from -0.01 mg/dL to 0.42 mg/dL varying according to level of baseline renal function. ACEI discontinuation was higher in patients with elevated baseline SCr (19/165, 11.5%) compared with those with SCr<1.5 (135/2,497, 5.4%), and those with SCr 1.5-2.0 (28/377, 7.4%). Male patients, and those with heart failure were less likely to discontinue ACEI after an elevation of serum creatinine post-ACEI initiation, while those taking NSAIDs, diuretics and beta-blockers were more likely to discontinue ACEI.

Conclusions: Serum creatinine increases <30% on average within 3 months of ACEI initiation,



1  
2  
3 with subsequent discontinuation rates varying by baseline SCr. Elevation in SCr was not  
4  
5 associated with ACEI discontinuation rates. In patients with SCr>2 mg/dL at baseline, despite an  
6  
7 acute increase in SCr after ACEI initiation, chronic ACEI use was associated with a decrease in  
8  
9 SCr in most patients.  
10  
11  
12  
13  
14  
15  
16  
17  
18  
19  
20  
21  
22  
23  
24  
25  
26  
27  
28  
29  
30  
31  
32  
33  
34  
35  
36  
37  
38  
39  
40  
41  
42  
43  
44  
45  
46  
47  
48  
49  
50  
51  
52  
53  
54  
55  
56  
57  
58  
59  
60

For peer review only

## Article Summary

### Strengths and Limitations of this Study

- To date, no studies have evaluated both the acute elevation in serum creatinine post-ACE inhibitor initiation and the predictors of subsequent discontinuation following an elevated serum creatinine.
- This study confirmed the mean increase in serum creatinine after ACE inhibitor initiation is 26%, varying with baseline renal function.
- Factors other than elevation in serum creatinine were associated with ACE inhibitor discontinuation, including, female sex, absence of heart failure, and use of NSAIDs, diuretics or beta-blockers.

## Introduction

Current guidelines recommend angiotensin-converting enzyme inhibitors (ACEIs) as the standard of therapy for post-myocardial infarction, chronic heart failure (CHF), and diabetes due to the substantial endothelial, cardiovascular and renal protection.<sup>1-4</sup> Furthermore, ACEIs have also been shown to be a beneficial therapy for hypertension.<sup>5</sup> The renal protective mechanism of ACEIs vary, ranging from improving vascular endothelium function to vasodilatation effects.<sup>6</sup> Despite evidence from numerous trials showing the benefits of improved morbidity and mortality by ACEIs, these drugs are still underutilized.<sup>1-4, 7-10</sup> Clinicians are reluctant to start and continue with adequate dosing of ACEIs primarily due to concerns of elevations in serum creatinine (SCr), particularly in patients with CKD despite evidence that this group of patients benefits from ACEI.<sup>10,11</sup> The most probable cause of an acute elevation in SCr post-ACEI initiation is the decrease in vasoconstriction in the efferent arterioles resulting in pressure reduction in the glomerular apparatus and decreased glomerular filtration rate (GFR).<sup>6</sup> However, homeostasis of hemodynamics occurs with long-term use with gradual return and improvement in GFR.<sup>7</sup> Even with concerns of an acute rise in SCr, ACEIs provide long-term benefits with some data suggesting an improvement in renal function with decrease in SCr with long-term use.<sup>7,11,12</sup> In heart failure (HF) patients, RCTs estimate that between 2.4% and 16% of patients experience an acute increase in SCr of > 0.5mg/dL after ACEI initiation, with improvement with chronic use.<sup>8-9</sup> In a practice-based setting, Bakris and colleagues demonstrated a mean increase in SCr of 30% in a hypertensive population using ACEIs with the increase stabilizing within 2 months after ACEI initiation. This rise in SCr is proportional to the baseline SCr, such that a 30% increase at a SCr of 2 would be 2.6 while at a SCr of 1, it would be only 1.3, it is reversible upon discontinuation, and it is less likely to occur beyond 4 weeks of initiation.<sup>13,14</sup> HF patients suffer

1  
2  
3 a more pronounced increase in SCr with ACEIs due to a reduction of blood flow to the kidneys  
4  
5 from reduced cardiac output, diuretic use, and vasodilation effect. Although the acute increase in  
6  
7 SCr seen in HF patients ranges from 75% to 200% from baseline after ACEI initiation, this  
8  
9 elevation was suggested as being acceptable since ACEIs have proven benefits in decreasing  
10  
11 mortality in this population.<sup>8,15</sup>  
12  
13

14  
15 The frequency of the discontinuation rate of ACEI and the determinant factors associated  
16  
17 with discontinuation in the real world setting has not been fully characterized. The  
18  
19 CONSENSUS II HF trial reported a discontinuation rate of 4.6% with enalapril subsequent to the  
20  
21 rise of SCr, while a meta-analysis of randomized controlled trials of HF patients found an ACEI  
22  
23 discontinuation rate of 13.8%, of which only 0.4% was attributed to an increase in SCr.<sup>7,16</sup>  
24  
25  
26

27 To date, no studies have evaluated both the acute elevation in SCr post-ACEI initiation  
28  
29 and the predictors of subsequent discontinuation following an elevated SCr. Assessment of these  
30  
31 patterns may provide insight into clinician decision making in a real world setting. The objective  
32  
33 of our study was to assess the rates and predictors of ACEI discontinuation following an increase  
34  
35 in SCr post-ACEI initiation, each according to baseline renal function.  
36  
37  
38  
39  
40  
41  
42  
43  
44  
45  
46  
47  
48  
49  
50  
51  
52  
53  
54  
55  
56  
57  
58  
59  
60

## Methods

We conducted a retrospective observational cohort study of all outpatients initiating an ACEI between 2002 and 2004 at the Veterans Affairs Greater Los Angeles Healthcare System (VAGLAHS). The Veterans Health Information System and Technology Architecture (VISTA) database was used to gather patient information (demographics, medication use, allergies, comorbidities, and lab results).

Initiation of ACEI was defined as the dispensing of an outpatient prescription for an ACEI with no previous record of ACEI use in the past 6 months. The following ACEI information was collected: initiation date, discontinuation date, adverse drug reactions (ADR), dosage, dosing frequency and the total daily dose. To determine the prevalence of a change in SCr, SCr was recorded at baseline (within 6 months of ACEI initiation) and 3-months (10-14 weeks) post-initiation. If SCr data was not available between 10-14 weeks (3 months), the data value of the most proximal assay was recorded. A 0.5mg/dL increase and 30% increase in SCr was considered to be clinically important since several studies have used this as a reference point to define a decrease in renal function.<sup>5-6,14</sup> Discontinuation of ACEI was defined as no refills within 90 days after the last filled prescription which allowed a lenient grace period for patients obtaining late refills. Patients were stratified into three baseline SCr groups (group 1: SCr <1.5mg/dL; group 2: 1.6-2.0mg/dL; and group 3: >2.0mg/dL) for analysis. We assessed above and below 0.5mg/dL and 30% to determine the threshold at which discontinuation occurred and to analyze possible differences in threshold by group. For those patients with a baseline SCr >2mg/dL and continued on an ACEI, SCr was recorded at 1-year to detect any changes post-initiation. Comorbidities (defined by ICD-9 codes: 425-cardiomyopathy, 428-congestive heart failure, 250-diabetes, 410-414-coronary artery disease, 274-gout, 401-hypertension) and

1  
2  
3 concurrent use of NSAIDs, diuretics, and beta-blockers were documented to determine potential  
4 factors associated with an increase in SCr and the discontinuation of ACEIs. Concomitant  
5 medication use was defined as having an active prescription within 1 month of the index date of  
6 ACEI prescription through the time of discontinuation.  
7  
8  
9  
10  
11

12 The endpoints of this study were: the proportion of patients with a significant increase in  
13 SCr post-ACEI initiation at 3-months follow-up defined as  $>0.5\text{mg/dL}$  or  $>30\%$  of baseline by  
14 group; the proportion of patients with ACEI discontinued following a rise in SCr by group; the  
15 threshold of increase in SCr associated with ACEI discontinuation, stratified by baseline SCr  
16 groups; factors (patient characteristics, comorbidities, and concurrent medications) that may be  
17 associated with discontinuation of ACEIs; and the change in SCr in patients with baseline SCr  
18  $>2\text{mg/dL}$  and continued on ACEIs for 1 year.  
19  
20  
21  
22  
23  
24  
25  
26  
27  
28

29 Continuous baseline characteristics were expressed as the mean  $\pm$ SD or median; and  
30 categorical baseline characteristics were expressed as a proportion. Chi square test was used to  
31 compare the discontinuation rate after detecting a rise in SCr post-ACEI use between groups and  
32 to compare the threshold of increase in SCr prior to discontinuation between groups. A multiple  
33 logistic regression model was constructed to identify the factors associated with SCr elevation  
34 subsequent to ACEI initiation and ACEI discontinuation. The univariate model included patient  
35 characteristics (i.e., age, gender), comorbidities (i.e., diabetes, hypertension, coronary artery  
36 disease, chronic heart failure, systolic blood pressure (SBP) $<100\text{mmHg}$ , gout), concomitant  
37 NSAID use, diuretic use (i.e. thiazide, loop,  $\text{K}^+$  sparing), beta-blocker use, and significant SCr  
38 elevation defined as  $>0.5\text{mg/dL}$  or  $>30\%$  of baseline. Variables with  $p < 0.2$  from the univariate  
39 model were placed in a multiple logistic regression model using stepwise selection. Odds ratio  
40 with 95% confidence interval were estimated from the regression model. A p-value  $< 0.05$  was  
41  
42  
43  
44  
45  
46  
47  
48  
49  
50  
51  
52  
53  
54  
55  
56  
57  
58  
59  
60

1  
2  
3 considered statistically significant. All results were analyzed using SAS [Version 8.2, SAS  
4  
5  
6 Institute, Cary, NC]. This was a non-funded study approved by the institutional review board at  
7  
8 VAGLAHS and Western University of Health Sciences.  
9  
10  
11  
12  
13  
14  
15  
16  
17  
18  
19  
20  
21  
22  
23  
24  
25  
26  
27  
28  
29  
30  
31  
32  
33  
34  
35  
36  
37  
38  
39  
40  
41  
42  
43  
44  
45  
46  
47  
48  
49  
50  
51  
52  
53  
54  
55  
56  
57  
58  
59  
60

For peer review only

## Results

1  
2  
3  
4  
5  
6 At a total of 3,039 patients were initiated on an ACEI between January 2002 and December  
7  
8 2004 and had a SCr measured within 6 months prior to and 3 months after initiating an ACEI.  
9  
10 (Figure 1) The average age was 65.0 years and 97.6% were male with a baseline SCr of 1.28+/-  
11  
12 0.86 mg/dL. Patients were stratified into three groups based on baseline SCr: Group 1 consisted  
13  
14 of 2,497 patients with a SCr of <1.5 mg/dL (mean of 1.05+/- 0.19); group 2 had 377 patients  
15  
16 with a SCr of 1.5-2.0 mg/dL (mean of 1.67 +/-0.16); and group 3 had 165 patients with a SCr of  
17  
18 >2.0 mg/dL (mean of 3.75+/-2.44). (Figure 1) Hypertension (44.2%) and diabetes (28.5%) were  
19  
20 the most frequently documented comorbidities, and the most common concomitant medications  
21  
22 were diuretics and beta-blockers. (Table 1)  
23  
24  
25

26  
27 On average, patients had a follow-up SCr available at a median of 3.8 months post-ACEI  
28  
29 initiation. The mean changes in SCr at 3 months follow-up most proximal to the 3-month interval  
30  
31 were 0.05 +/-0.30 mg/dL, -0.01+/-0.31 mg/dL, and 0.42 +/-2.20 mg/dL respectively, by group  
32  
33 (p>0.05 vs. baseline for all groups). There was no change in median SCr at 3 months follow-up  
34  
35 for all three groups. Counting only those patients with an increase in SCr for all 3 groups, based  
36  
37 on an increase from baseline SCr (n=182), the average percent increase in SCr prior to ACEI  
38  
39 discontinuation was 25.98% +/-41.72 with a median of 13.49%.  
40  
41  
42

43  
44 At 3 months, the discontinuation rate of ACEI with or without concomitant SCr rise of  
45  
46 >0.5mg/dL was highest in group 3 (11.5%), followed by group 2 (7.4%) and group 1 (5.4%) (p<  
47  
48 0.001) (Figure 1). In the multiple logistic regression model the variables significantly associated  
49  
50 with a greater likelihood of ACEI discontinuation were the use of NSAIDs, diuretics, and beta-  
51  
52 blockers. (Table 2) Of note, a significant increase in SCr (defined as >0.5mg/dl or >30 %) was  
53  
54 not associated with ACEI discontinuation. (p=0.498 in the univariate model). A history of CHF,  
55  
56  
57  
58  
59  
60



1  
2  
3 SBP of <100mmHg at baseline and male sex were significantly associated with a reduced  
4  
5 likelihood of ACEI discontinuation.  
6  
7

8 Changes in SCr were further evaluated based on absolute and percent change. Table 3  
9  
10 depicts the change in SCr prior to ACEI discontinuation, at the threshold of 0.5mg/dL and 30%  
11  
12 increase in SCr (in 182 patients [5.9%] of all patients initiated on ACEI who had an increase in  
13  
14 SCr). Group 3 had the highest mean increase in SCr as both absolute and percent change. A  
15  
16 majority of the patients who experienced an increase in SCr had a change less than both 30%  
17  
18 increase and 0.5mg/dL increase prior to discontinuation. Thus, most ACEI discontinuation did  
19  
20 not occur following a clinically significant increase in SCr (>30% or >0.5mg/dL above baseline).  
21  
22  
23  
24

25 Of the 165 patients with a baseline SCr >2.0mg/dL (mean 3.75+/-2.44), only 50 patients  
26  
27 (30.3%) were continued on an ACEI at 1 year. A total of 69 of the 165 (41.8%) patients  
28  
29 experienced a decrease in SCr prior to discontinuation (average decrease was 1.04 +/- 1.77) and  
30  
31 76 (46.0%) of the patients experienced an increase (average increase was 1.86+/-0.87) and 20  
32  
33 (12.1%) patients experienced no change from baseline prior to discontinuation. Of the 50  
34  
35 patients who continued on ACEIs, only 35 patients had a follow-up in SCr at 1 year and their  
36  
37 mean decrease in SCr was -0.24 +/-0.56 with a median decrease of -0.01mg/dL. Of these 35  
38  
39 patients, one (2.86%) had a larger increase in SCr (from 2.5 to 9.1 mg/dL) as compared with the  
40  
41 remaining patients in the group (Figure 2). Excluding this subject as an outlier with a rise in SCr  
42  
43 at 1 year that is unlikely due to ACEI, resulted in a mean decrease in SCr at 1 year in group 3 of -  
44  
45 0.44+/-1.96 with a median of -0.01mg/dL. While the majority (54.28%) of patients in Group 3  
46  
47 experienced a clinically significant absolute (>0.5 mg/dL) increase in SCr of 0.98+/-1.58  
48  
49 compared with a baseline of 3.75+/-2.44, the 27% relative increase was not above the generally  
50  
51 accepted threshold of >30%. Forty percent of this group experienced a decrease in SCr of  
52  
53  
54  
55  
56  
57  
58  
59  
60

1  
2  
3 1.19+/-2.26 compared to baseline 3.75+/-2.44 and 5.7% had no change in SCr at 1-year follow-  
4  
5 up. The average magnitude of decrease in SCr was greater than the average magnitude of  
6  
7 increase in SCr with long term use of ACEI (1.19+/-2.26 mg/dL decrease versus 0.98 +/-  
8  
9 1.58mg/dL increase, p<0.001) in patients with SCr>2 mg/dL.  
10  
11  
12  
13  
14  
15  
16  
17  
18  
19  
20  
21  
22  
23  
24  
25  
26  
27  
28  
29  
30  
31  
32  
33  
34  
35  
36  
37  
38  
39  
40  
41  
42  
43  
44  
45  
46  
47  
48  
49  
50  
51  
52  
53  
54  
55  
56  
57  
58  
59  
60

For peer review only

## Discussion

In our study, which had a large hypertensive population, we showed an increase in SCr of approximately 26% post-ACEI initiation, for those with an increase in SCr. Previous studies have documented similar acute increases in SCr of 30% in hypertensive patients and up to 200% in HF patients.<sup>13,14</sup> It has been suggested that ACEI discontinuation be considered if an increase in SCr exceeds 30% with ACEI use since renal function may be compromised beyond this increase and the benefits of ACEI may not outweigh the risks.<sup>13</sup> Our study showed that the majority of ACEI discontinuation occurred with an increase of less than 30% in SCr, thus suggesting that the threshold of concern for renal deterioration is lower in clinical practice or other factors may be more likely associated with discontinuation.

According to previous trials, a change in SCr of  $>0.5\text{mg/dL}$  may also be considered clinically significant.<sup>8,9</sup> The majority of the patients that discontinued ACEI in our study experienced a  $<0.5\text{mg/dL}$  change in SCr. Our study further suggested that on average, SCr was not greatly affected by ACEI since all three groups had no change in median SCr over 3 months. Thus, the discontinuation of ACEI in our population was most likely attributed to drug intolerances, such as, cough, other comorbidities, and concomitant medications, rather than the change in SCr. Only 6% of patients in the lower baseline SCr group suffered from documented cough or nausea leading to the discontinuation of ACEI. The adjusted regression analysis demonstrated that concomitant use of NSAIDs, diuretics, and beta-blockers were factors associated with a higher likelihood of ACEI discontinuation. This may be anticipated since both NSAIDs and diuretics have been documented to decrease renal function and exacerbate SCr elevations when used concomitantly with ACEI.<sup>12</sup> However, this may have led to the discontinuation of ACEI at a lower threshold of SCr increase. If discontinuation of ACEI was

1  
2  
3 indeed at a lower threshold than that traditionally accepted (SCr rise >0.5 or 30%), improved  
4 awareness for clinicians of the short duration of an acute rise in SCr when initiating ACEI, and  
5  
6 dose reduction or reassessment of need for concomitant NSAIDs or diuretics may be beneficial  
7  
8 strategies. This may confer better clinical outcomes for patients, particularly diabetic patients  
9  
10 who would benefit from the nephroprotective actions of ACEI. Contrary to previous findings,  
11  
12 beta-blockers were associated with a higher likelihood of discontinuation with concomitant use  
13  
14 of ACEI in our study rather than exerting a renoprotective effect with ACEI use.<sup>14</sup> Male sex,  
15  
16 CHF history, and SBP of <100mmHg were also associated with a lower chance of ACEI  
17  
18 discontinuation. We postulated that patients with CHF and SBP <100mmHg were more likely to  
19  
20 be maintained on an ACEI since HF studies have documented benefits of ACEI in decreasing  
21  
22 morbidity and mortality.<sup>1,7-8</sup>  
23  
24  
25  
26  
27  
28

29 In patients with baseline SCr >2 mg/dL, our study showed that SCr can increase,  
30  
31 decrease, or remain unchanged with long term ACEI use. Even though the majority of these  
32  
33 patients experienced an acute increase in SCr, our results support ACEI use in renal impaired  
34  
35 patients since the median change in SCr decreased and in the long term, the magnitude of  
36  
37 decrease was much more impressive than the magnitude of increase. Our study is consistent  
38  
39 with the prospective findings by Hou et al and retrospective findings by Hirsch et al, who both  
40  
41 found that despite the acute increase in SCr, long term improvement in SCr occurs in many  
42  
43 patients with impaired renal function at baseline.<sup>11,15,16</sup> The use of ACEI is warranted in this  
44  
45 group of patients, along with close monitoring of renal function and electrolytes since benefits  
46  
47 were documented in this study as well as in previous studies.<sup>11-12,17-20</sup>  
48  
49  
50  
51  
52

53 Limitations of our study include its retrospective study design with potential for  
54  
55 confounding.<sup>21</sup> Given our VA population, the vast majority of patients were male, limiting  
56  
57  
58  
59  
60

1  
2  
3 generalizability to female patients. In addition, the electronic medical records may not be  
4 complete and accurate as is a limitation of any study relying on retrospective medical chart  
5 extraction. We did not have data on the peak creatinine, nor comprehensive assessment of all  
6 adverse events given our data extraction methods. Finally, the sample size of patients with SCr  
7 >2 mg/dL was small both pre- and post-follow-up of SCr, particularly at 1-year follow-up.  
8 Exploration of the reasons for ACEI discontinuation long-term in this group would be beneficial.  
9  
10  
11  
12  
13  
14  
15  
16  
17 However, the large population-based sample increases the generalizability of the findings.

18  
19  
20 Many clinicians may be reluctant to prescribe ACEIs to all eligible patients due to  
21 concerns of an elevation in SCr. Based on this real world study, the magnitude of increase in  
22 SCr post-ACEI initiation was slightly lower than the commonly used threshold of 30%. We  
23 found that, instead of a clinically meaningful rise in SCr, ACEI discontinuation may be more  
24 likely associated with either comorbidities, concomitant medications that may increase SCr, or a  
25 low threshold of concern for SCr elevations. Identification of other factors that may increase  
26 SCr, such as, NSAID use, diuretic use, and volume depletion should be considered before an  
27 ACEI is discontinued. The importance of monitoring should be emphasized to detect any drastic  
28 increase in SCr >30% and to manage potential adverse drug reactions. Education may be  
29 required to change practice patterns in patients with impaired baseline renal function in order to  
30 confer the clinical benefit of chronic ACEI nephroprotection.  
31  
32  
33  
34  
35  
36  
37  
38  
39  
40  
41  
42  
43  
44  
45  
46  
47  
48  
49  
50  
51  
52  
53  
54  
55  
56  
57  
58  
59  
60

**Author Contributions:**

Jackevicius: Concept/design, data interpretation, critical revision of article, approval of article, statistics

Wong: Design, data analysis/interpretation, drafting article, approval of article, statistics

Aroustamian: Data analysis, critical revision of article, approval of article, statistics

Gee: Data collection/interpretation, critical revision of article, approval of article

Mody: Concept/design, data interpretation, critical revision of article, approval of article

**Funding:** None.

**Data Sharing:** No additional data available.

**Acknowledgments:** None.

**Table 1. Baseline characteristics of cohort (n= 3,039)**

| Characteristic                                       | Value*                                      |
|------------------------------------------------------|---------------------------------------------|
| Age (years, mean+/-SD, median)                       | 65 +/-12, 65                                |
| Gender (n, %)                                        |                                             |
| Male                                                 | 2966 97.6%                                  |
| Ethnicity (n, %)                                     |                                             |
| African American                                     | 414 13.6%                                   |
| Caucasian                                            | 670 22.0%                                   |
| Hispanic                                             | 44 1.45%                                    |
| Other                                                | 341 11.2%                                   |
| Not documented                                       | 1570 51.7%                                  |
| Baseline serum creatinine (mg/dL, mean+/-SD, median) | Mean+/-SD, Median                           |
| Overall (n=3,039)                                    | Overall: Overall: 1.28 +/- 0.86, 1.10       |
| Group 1 : < 1.5mg/dL (n=2,497)                       | Group 1 : < 1.5mg/dL = 1.05 +/-0.19, 1.03   |
| Group 2 : 1.5-2.0 mg/dL (n=377)                      | Group 2 : 1.5-2.0 mg/dL = 1.67 +/-0.16, 1.6 |
| Group 3 : > 2 mg/dL (n=165)                          | Group 3 : > 2 mg/dL = 3.75+/-2.44, 2.7      |

| Co-morbidities (n, %)   | n    | %      |
|-------------------------|------|--------|
| Diabetes Mellitus       | 866  | 28.5 % |
| Hypertension            | 1343 | 44.2 % |
| Chronic Heart Failure   | 177  | 5.8 %  |
| Coronary Artery Disease | 445  | 14.6 % |
| Gout                    | 69   | 2.3 %  |
| SBP <100 mmHg           | 88   | 2.9 %  |
| Concomitant Use of:     |      |        |
| NSAIDs                  | 1053 | 34.6 % |
| Diuretics (total)       | 1771 | 58.3 % |
| Loops                   | 773  | 25.4 % |
| Thiazides               | 1264 | 41.6 % |
| K- sparing              | 239  | 7.9 %  |
| Beta-blockers           | 1601 | 52.7 % |

\*Values are reported as mean +/- SD; median unless otherwise noted



**Table 2. Multivariate odds ratios for discontinuation of angiotensin-converting enzyme inhibitors subsequent to elevation of SCr post-ACEI initiation**

| Co morbidities          | Multivariate<br>Odds Ratio<br>(95% CI) | P value |
|-------------------------|----------------------------------------|---------|
| Age                     | 1.00(1.00-1.00)*                       | 0.452   |
| Gender (Male)           | 0.74 (0.57-0.97)                       | 0.028   |
| Coronary Artery Disease | 0.89 (0.79-1.01)                       | 0.061   |
| Chronic Heart Failure   | 0.79 (0.63-0.99)                       | 0.041   |
| SBP <100mmHg            | 0.55 (0.40-0.76)                       | <0.001  |
| Concomitant use of:     |                                        |         |
| NSAIDs                  | 1.23(1.13-1.34)                        | <0.001  |
| Diuretics               | 1.07( 0.87-1.31)                       | <0.001  |
| Thiazides               | 1.18 (0.98-1.42)                       | 0.084   |
| Loops                   | 0.99 (0.84-1.18)                       | 0.925   |
| Beta-blockers           | 1.17( 1.08-1.27)                       | <0.001  |

\* Values rounded from 0.999( 0.995-1.002)

**Table 3. Distribution in magnitude of elevation of serum creatinine in patients who discontinued angiotensin-converting enzyme inhibitors within 90 days post-initiation**

| Threshold of increase in SCr | Group 1<br>< 1.5mg/dL<br>n=135            | Group 2<br>1.5-2mg/dL<br>n=28          | Group 3<br>> 2mg/dL<br>n=19              | P value |
|------------------------------|-------------------------------------------|----------------------------------------|------------------------------------------|---------|
| ≤ 0.5mg/dL increase          | 124 (91.85)<br>0.17 +/-0.11; 0.10         | 25(89.29)<br>0.18+/- 0.8; 0.17         | 8 (42.10)<br>0.27+/- 0.14; 0.3           | <0.001  |
| > 0.5mg/dL increase          | 11 (8.15)<br>1.23 +/- 0.99; 0.80          | 3 (10.71)<br>0.87 +/-0.25; 0.9         | 11 (57.90)<br>2.95 +/- 2.93; 1.7         | <0.001  |
| ≤ 30% increase               | 114 (84.45)<br>14.15%+/- 6.85%;<br>11.11% | 25 (89.29)<br>10.22%+/- 4.6%;<br>9.25% | 12 (63.15)<br>12.82%+/-6.64%;<br>12.99%  | 0.01    |
| > 30% increase               | 21 (15.55)<br>89.25%+/-81.07%;<br>46.67%  | 3 (10.71)<br>45.83% +/- 8.78%;<br>45%  | 7 (36.85)<br>100.32%+/-69.10%;<br>88.23% | <0.001  |

\*Values are n (%) and mean+/- SD; median

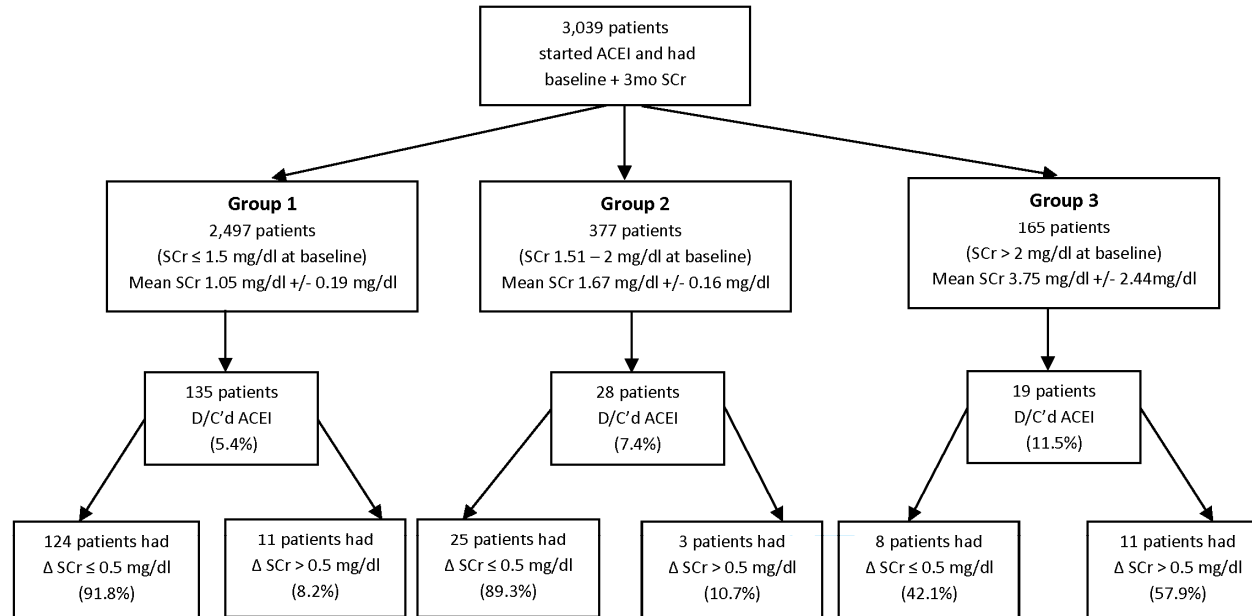

Figure1. Profile of patients included in analysis.  
ACEI: Angiotensin-Converting Enzyme Inhibitors; ADR: Adverse Drug Reaction; DIC'd: discontinued; SCr: Serum Creatinine.

1  
2  
3  
4  
5  
6  
7  
8  
9  
10  
11  
12  
13  
14  
15  
16  
17  
18  
19  
20  
21  
22  
23  
24  
25  
26  
27  
28  
29  
30  
31  
32  
33  
34  
35  
36  
37  
38  
39  
40  
41  
42  
43  
44  
45  
46  
47  
48  
49  
50  
51  
52  
53  
54  
55  
56  
57  
58  
59  
60

Figure 2: Changes in Serum Creatinine at 1 Year for Patients with SCr>2 mg/dL

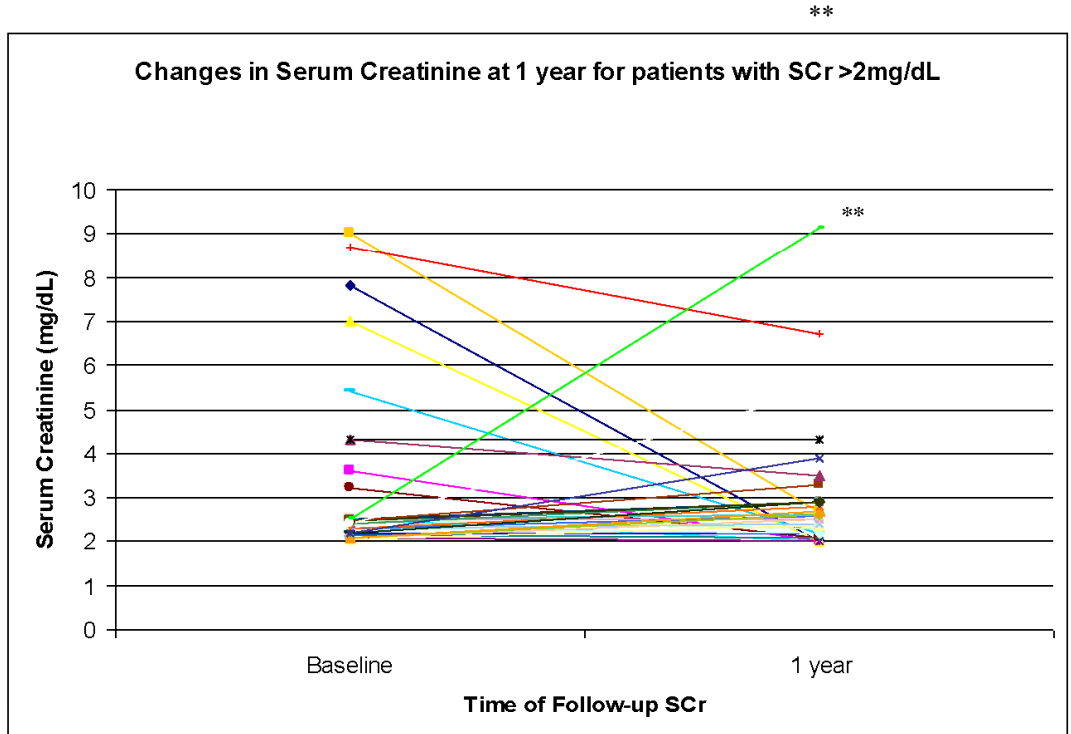

\*The mean change in serum creatinine was -0.24 +/- 0.56 mg/dL with a median of -0.01mg/dL. Excluding outlier (\*\*), resulted in a mean in change serum creatinine of -0.44 +/- 1.96 mg/dL with a median of -0.01mg/dL.

N= 35

1  
2  
3 **Figure Legends**  
4

5  
6 **Figure 1:**  
7

8  
9 **Title: Profile of patients included in the analysis.**  
10  
11

12  
13  
14  
15 **Figure 2:**  
16

17  
18 **Title: Change in Serum Creatinine at 1 Year for Patients with S<sub>Cr</sub>>2mg/dL**  
19

20  
21 **x-axis: Time of Follow-up S<sub>Cr</sub>**  
22

23  
24 **y-axis: Serum Creatinine (,g/dL)**  
25  
26  
27  
28  
29  
30  
31  
32  
33  
34  
35  
36  
37  
38  
39  
40  
41  
42  
43  
44  
45  
46  
47  
48  
49  
50  
51  
52  
53  
54  
55  
56  
57  
58  
59  
60

## References

1. Hung SA, Abraham WT, Chin MH, et al. ACC/AHA 2005 guideline update for the diagnosis and management of chronic heart failure in the adult: a report of the American College of Cardiology/American Heart Association Task Force on Practice Guidelines (Writing Committee to Update the 2001 Guidelines for the Evaluation and Management of Heart Failure). American College of Cardiology Web Site. Available at: <http://www.acc.org/clinical/guidelines/failure//index.pdf>.
2. Antman EM, Anbe DT, Armstrong PW, et al. ACC/AHA Guidelines for the management of patients with ST-elevation myocardial infarction- Executive Summary. J Am Coll Cardiol 2004;44:671-7.
3. American Diabetes Association. Standards of Medical Care in Diabetes-2014. Diabetes Care 2014;37;S5-S13.
4. Marre M, Leblanc H, Suarez L, et al. Converting enzyme inhibition and kidney function in normotensive diabetic patients with persistent microalbuminuria. BMJ 1987;294:1448-52.
5. Chobanian AV, Bakris GL, Black HR, et al. The Seventh Report of the Joint National Committee on Prevention, Detection, Evaluation, and Treatment of High Blood Pressure. JAMA 2003;289:2560-72.
6. Matsuda H, Hayashi K, Arakawa K, et al. Zonal heterogeneity in action of angiotensin-converting enzyme inhibitor on renal microcirculation. J Am Soc Nephrol 1999;10:2272-82.
7. Ahmed A, Kiefe C, Allman R, et al. Survival benefits of angiotensin converting enzyme inhibitors in older heart failure patients with perceived contraindications. J Amer Ger Soc 2002;50:1659-66.

- 1  
2  
3 8. The CONSENSUS Trial Study Group. Effects of enalapril on mortality in severe congestive  
4 heart failure: results of the Cooperative North Scandinavian Enalapril Survival Study  
5 (CONSENSUS). *N Engl J Med* 1986;316:1429-35.  
6  
7
- 8 9. The SOLVD Investigators. Effects of enalapril on mortality and the development of heart  
9 failure in asymptomatic patients with reduced left ventricular ejection fractions. *N Engl J*  
10 *Med* 1987;325:293-302.  
11  
12
- 13 10. Ghali JK, Giles T, Gonzales M, et al. Patterns of physician use of angiotensin converting  
14 enzyme inhibitors in the inpatient treatment of congestive heart failure. *J. La State Med Soc*  
15 *1997;149:474-84.*  
16  
17
- 18 11. Hou FF, Zhang X, Zhang GH, et al. Efficacy and safety of benazepril for advanced chronic  
19 renal insufficiency. *N Engl J Med* 2006;354:131-40.  
20  
21
- 22 12. Schoolwerth AC, Sica D, Ballerma B, Wilcox C. Renal considerations in angiotensin  
23 converting enzyme inhibitor therapy: A statement of healthcare professional from the  
24 Council on the Kidney in Cardiovascular Disease and the Council of High Blood Pressure  
25 Research of the American Heart Association. *Circulation* 2001;104:1985-91.  
26  
27
- 28 13. Bakris GL, Weir MR. Angiotensin- converting enzyme inhibitor associated elevations in  
29 SCr. Is this a cause for concern? *Arch Intern Med* 2000;168:685-88.  
30  
31
- 32 14. Knight E, Glynn R, McIntyre K, et al. Predictors of decreased renal function in patients with  
33 heart failure during angiotensin-converting enzyme inhibitor therapy: results from the Studies  
34 of Left Ventricular Dysfunction (SOLVD). *Amer Heart J* 1999;138:849-55.  
35  
36
- 37 15. Hirsch S, Hirsch J, Udayan B, Rovin BH. Tolerating increases in serum creatinine following  
38 aggressive treatment of chronic kidney disease, hypertension and proteinuria: pre-renal  
39 success. *Am J Nephrol* 2012;36:430-7.  
40  
41  
42  
43  
44  
45  
46  
47  
48  
49  
50  
51  
52  
53  
54  
55  
56  
57  
58  
59  
60

- 1  
2  
3 16. Ruggenenti P, Remuzzi G. Dealing with renin-angiotensin inhibitors, don't mind serum  
4  
5 creatinine. *Am J Nephrol* 2012;36:427-9.  
6  
7
- 8 17. Ahmed A. Use of angiotensin-converting enzyme inhibitors in patients with heart failure and  
9  
10 renal insufficiency: How concerned should we be by the rise in SCr. *J Amer Ger Soc*  
11  
12 2002;50:1297-1300.  
13
- 14 18. Raebel M, Lyons E, Andrade S, et al. Laboratory monitoring of drugs at initiation of therapy  
15  
16 in ambulatory care. *J Gen Intern Med* 2005;20:1120-26.  
17  
18
- 19 19. Gurwitz JH, Field TS, Harrold LR, et al. Incidence and preventability of adverse drug events  
20  
21 among older persons in the ambulatory setting. *JAMA* 2003;289:1107-16.  
22  
23
- 24 20. Raebel M, Lyons E, Chester E, et al. Randomized trial to improve safety monitoring of  
25  
26 ongoing drug therapy in ambulatory patients. *Pharmacotherapy* 2006;5:626-29.  
27  
28
- 29 21. Hess D. Retrospective studies and chart reviews. *Respir Care* Oct 2004;49:1171-74.  
30  
31  
32  
33  
34  
35  
36  
37  
38  
39  
40  
41  
42  
43  
44  
45  
46  
47  
48  
49  
50  
51  
52  
53  
54  
55  
56  
57  
58  
59  
60



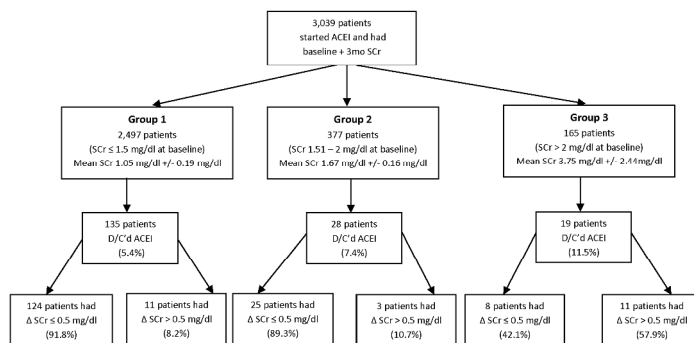

Figure 1. Profile of patients included in analysis.  
ACEI: Angiotensin-Converting Enzyme Inhibitors; ADR: Adverse Drug Reaction; D/C'd: discontinued; SCr: Serum Creatinine.

279x215mm (300 x 300 DPI)

Review only

1  
2  
3  
4  
5  
6  
7  
8  
9  
10  
11  
12  
13  
14  
15  
16  
17  
18  
19  
20  
21  
22  
23  
24  
25  
26  
27  
28  
29  
30  
31  
32  
33  
34  
35  
36  
37  
38  
39  
40  
41  
42  
43  
44  
45  
46  
47  
48  
49  
50  
51  
52  
53  
54  
55  
56  
57  
58  
59  
60

Figure 2: Changes in Serum Creatinine at 1 Year for Patients with SCr>2 mg/dL

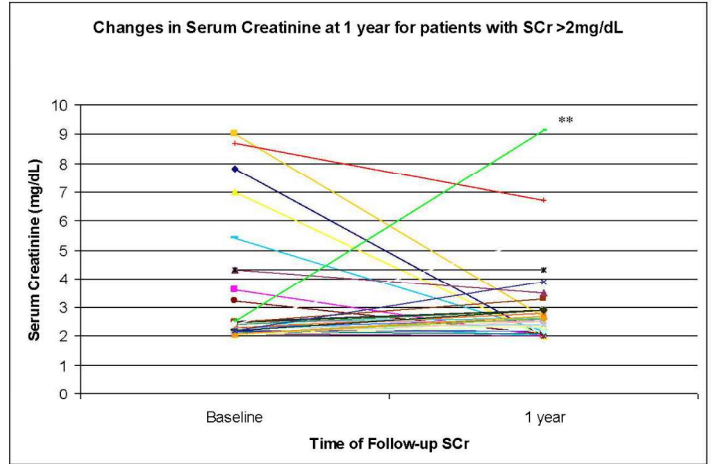

\*The mean change in serum creatinine was -0.24 +/- 0.56 mg/dL with a median of -0.01mg/dL. Excluding outlier (\*\*\*) resulted in a mean in change serum creatinine of -0.44 +/- 1.96 mg/dL with a median of -0.01mg/dL.

N= 35

215x279mm (300 x 300 DPI)

STROBE 2007 (v4) Statement—Checklist of items that should be included in reports of *cohort studies*

| Section/Topic                | Item # | Recommendation                                                                                                                                                                       | Reported on page # |
|------------------------------|--------|--------------------------------------------------------------------------------------------------------------------------------------------------------------------------------------|--------------------|
| Title and abstract           | 1      | (a) Indicate the study's design with a commonly used term in the title or the abstract                                                                                               | 1                  |
|                              |        | (b) Provide in the abstract an informative and balanced summary of what was done and what was found                                                                                  | 2                  |
| <b>Introduction</b>          |        |                                                                                                                                                                                      |                    |
| Background/rationale         | 2      | Explain the scientific background and rationale for the investigation being reported                                                                                                 | 3-4                |
| Objectives                   | 3      | State specific objectives, including any prespecified hypotheses                                                                                                                     | 4                  |
| <b>Methods</b>               |        |                                                                                                                                                                                      |                    |
| Study design                 | 4      | Present key elements of study design early in the paper                                                                                                                              | 5                  |
| Setting                      | 5      | Describe the setting, locations, and relevant dates, including periods of recruitment, exposure, follow-up, and data collection                                                      | 5-6                |
| Participants                 | 6      | (a) Give the eligibility criteria, and the sources and methods of selection of participants. Describe methods of follow-up                                                           | 5-6                |
|                              |        | (b) For matched studies, give matching criteria and number of exposed and unexposed                                                                                                  | N/A                |
| Variables                    | 7      | Clearly define all outcomes, exposures, predictors, potential confounders, and effect modifiers. Give diagnostic criteria, if applicable                                             | 6                  |
| Data sources/<br>measurement | 8*     | For each variable of interest, give sources of data and details of methods of assessment (measurement). Describe comparability of assessment methods if there is more than one group | 5                  |
| Bias                         | 9      | Describe any efforts to address potential sources of bias                                                                                                                            | 6                  |
| Study size                   | 10     | Explain how the study size was arrived at                                                                                                                                            | 5                  |
| Quantitative variables       | 11     | Explain how quantitative variables were handled in the analyses. If applicable, describe which groupings were chosen and why                                                         | 6                  |
| Statistical methods          | 12     | (a) Describe all statistical methods, including those used to control for confounding                                                                                                | 6                  |
|                              |        | (b) Describe any methods used to examine subgroups and interactions                                                                                                                  | N/A                |
|                              |        | (c) Explain how missing data were addressed                                                                                                                                          | N/A                |
|                              |        | (d) If applicable, explain how loss to follow-up was addressed                                                                                                                       | 6                  |
|                              |        | (e) Describe any sensitivity analyses                                                                                                                                                | N/A                |
| <b>Results</b>               |        |                                                                                                                                                                                      |                    |

|                          |     |                                                                                                                                                                                                              |            |
|--------------------------|-----|--------------------------------------------------------------------------------------------------------------------------------------------------------------------------------------------------------------|------------|
| Participants             | 13* | (a) Report numbers of individuals at each stage of study—eg numbers potentially eligible, examined for eligibility, confirmed eligible, included in the study, completing follow-up, and analysed            | 8,18       |
|                          |     | (b) Give reasons for non-participation at each stage                                                                                                                                                         | N/A        |
|                          |     | (c) Consider use of a flow diagram                                                                                                                                                                           | N/A        |
| Descriptive data         | 14* | (a) Give characteristics of study participants (eg demographic, clinical, social) and information on exposures and potential confounders                                                                     | 8,14-15    |
|                          |     | (b) Indicate number of participants with missing data for each variable of interest                                                                                                                          | N/A        |
|                          |     | (c) Summarise follow-up time (eg, average and total amount)                                                                                                                                                  | 8,18       |
| Outcome data             | 15* | Report numbers of outcome events or summary measures over time                                                                                                                                               | 8-9,17     |
| Main results             | 16  | (a) Give unadjusted estimates and, if applicable, confounder-adjusted estimates and their precision (eg, 95% confidence interval). Make clear which confounders were adjusted for and why they were included | 8-10,17    |
|                          |     | (b) Report category boundaries when continuous variables were categorized                                                                                                                                    | 8-10,14-17 |
|                          |     | (c) If relevant, consider translating estimates of relative risk into absolute risk for a meaningful time period                                                                                             | N/A        |
| Other analyses           | 17  | Report other analyses done—eg analyses of subgroups and interactions, and sensitivity analyses                                                                                                               | N/A        |
| <b>Discussion</b>        |     |                                                                                                                                                                                                              |            |
| Key results              | 18  | Summarise key results with reference to study objectives                                                                                                                                                     | 8-10       |
| <b>Limitations</b>       |     |                                                                                                                                                                                                              |            |
| Interpretation           | 20  | Give a cautious overall interpretation of results considering objectives, limitations, multiplicity of analyses, results from similar studies, and other relevant evidence                                   | 11-13      |
| Generalisability         | 21  | Discuss the generalisability (external validity) of the study results                                                                                                                                        | 13         |
| <b>Other information</b> |     |                                                                                                                                                                                                              |            |
| Funding                  | 22  | Give the source of funding and the role of the funders for the present study and, if applicable, for the original study on which the present article is based                                                | 20         |

\*Give information separately for cases and controls in case-control studies and, if applicable, for exposed and unexposed groups in cohort and cross-sectional studies.

**Note:** An Explanation and Elaboration article discusses each checklist item and gives methodological background and published examples of transparent reporting. The STROBE checklist is best used in conjunction with this article (freely available on the Web sites of PLoS Medicine at <http://www.plosmedicine.org/>, Annals of Internal Medicine at <http://www.annals.org/>, and Epidemiology at <http://www.epidem.com/>). Information on the STROBE Initiative is available at [www.strobe-statement.org](http://www.strobe-statement.org).
